# Supplementary material for: F-element metalated dipyrrins: synthesis and characterization of a family of uranyl bis(dipyrrinate) complexes
Source: Royal Society of Chemistry journal article supplement (doi:10.1039/c7dt00150a), 2017-01-01
Supplement: c7dt00150a1.pdf [file c7dt00150a1.pdf]

Supporting Information for:

***F*-element metalated dipyrrens: Synthesis and characterization of a family of uranyl bis(dipyrriinate) complexes**

*Duer Bolotaulo, Alejandro J. Metta-Magaña, and Skye Fortier\**

Dept. of Chemistry, University of Texas at El Paso, El Paso, TX 79968

\*To whom correspondence should be addressed. Email: [asfortier@utep.edu](mailto:asfortier@utep.edu)

## TABLE OF CONTENTS TABLE OF CONTENTS

|                                                                                  |     |
|----------------------------------------------------------------------------------|-----|
| <b>Figure S1.</b> $^1\text{H}$ NMR spectrum of $2^{\text{Fc}}$ .....             | S5  |
| <b>Figure S2.</b> $^{13}\text{C}$ NMR spectrum of $2^{\text{Fc}}$ in. ....       | S6  |
| <b>Figure S3.</b> HMQCGP NMR spectrum of $2^{\text{Fc}}$ .....                   | S7  |
| <b>Figure S4.</b> $^1\text{H}$ NMR spectrum of $3^{\text{tol}}$ .....            | S8  |
| <b>Figure S5.</b> $^{13}\text{C}$ NMR spectrum of $3^{\text{tol}}$ .....         | S9  |
| <b>Figure S6.</b> HMQCGP NMR spectrum of $3^{\text{tol}}$ .....                  | S10 |
| <b>Figure S7.</b> $^1\text{H}$ NMR spectrum of $3^{\text{anis}}$ .....           | S11 |
| <b>Figure S8.</b> $^{13}\text{C}$ NMR spectrum of $3^{\text{anis}}$ .....        | S12 |
| <b>Figure S9.</b> HMQCGP NMR spectrum of $3^{\text{anis}}$ .....                 | S13 |
| <b>Figure S10.</b> $^1\text{H}$ NMR spectrum of $3^{\text{mes}}$ .....           | S14 |
| <b>Figure S11.</b> $^{13}\text{C}$ NMR spectrum of $3^{\text{mes}}$ .....        | S15 |
| <b>Figure S12.</b> HMQCGP NMR spectrum of $3^{\text{mes}}$ .....                 | S16 |
| <b>Figure S13.</b> $^1\text{H}$ NMR spectrum of $3^{\text{Fc}}$ .....            | S17 |
| <b>Figure S14.</b> $^{13}\text{C}$ NMR spectrum of $3^{\text{Fc}}$ .....         | S18 |
| <b>Figure S15.</b> HMQCGP NMR spectrum of $3^{\text{Fc}}$ .....                  | S19 |
| <b>Figure S16.</b> $^1\text{H}$ NMR spectrum of $4^{\text{tol}}$ -THF. ....      | S20 |
| <b>Figure S17.</b> $^1\text{H}$ NMR spectrum of $4^{\text{anis}}$ -THF. ....     | S21 |
| <b>Figure S18.</b> $^1\text{H}$ NMR spectrum of $4^{\text{mes}}$ -THF. ....      | S22 |
| <b>Figure S19.</b> $^1\text{H}$ NMR spectrum of $4^{\text{Fc}}$ -THF. ....       | S23 |
| <b>Figure S20.</b> $^1\text{H}$ NMR spectrum of $4^{\text{tol}}$ -DMAP. ....     | S24 |
| <b>Figure S21.</b> $^{13}\text{C}$ NMR spectrum of $4^{\text{tol}}$ -DMAP. ....  | S25 |
| <b>Figure S22.</b> HMQCGP NMR spectrum of $4^{\text{tol}}$ -DMAP. ....           | S26 |
| <b>Figure S23.</b> $^1\text{H}$ NMR spectrum of $4^{\text{anis}}$ -DMAP. ....    | S27 |
| <b>Figure S24.</b> $^{13}\text{C}$ NMR spectrum of $4^{\text{anis}}$ -DMAP. .... | S28 |

|                                                                                                                                |     |
|--------------------------------------------------------------------------------------------------------------------------------|-----|
| <b>Figure S25.</b> HMQCGP NMR spectrum of <b>4<sup>anis</sup></b> -DMAP.....                                                   | S29 |
| <b>Figure S26.</b> <sup>1</sup> H NMR spectrum of <b>4<sup>mes</sup></b> -DMAP.....                                            | S30 |
| <b>Figure S27.</b> <sup>13</sup> C NMR spectrum of <b>4<sup>mes</sup></b> -DMAP.....                                           | S31 |
| <b>Figure S28.</b> HMQCGP NMR spectrum of <b>4<sup>mes</sup></b> -DMAP.....                                                    | S32 |
| <b>Figure S29.</b> <sup>1</sup> H NMR spectral array of <b>4<sup>Fc</sup></b> -DMAP.....                                       | S33 |
| <b>Figure S30.</b> <sup>1</sup> H NMR spectrum of <b>4<sup>Fc</sup></b> -DMAP at -30 °C.....                                   | S34 |
| <b>Figure S31.</b> <sup>1</sup> H NMR spectrum of <b>4<sup>tol</sup></b> -DMAP at 30 °C.....                                   | S35 |
| <b>Figure S32.</b> <sup>1</sup> H NMR spectrum of <b>4<sup>tol</sup></b> -DMAP in at 80 °C.....                                | S36 |
| <b>Figure S33.</b> Solid-state molecular structure of <b>4<sup>tol</sup></b> -THF·3THF.....                                    | S37 |
| <b>Figure S34.</b> Solid-state molecular structure of <b>4<sup>anis</sup></b> -THF·THF·C <sub>5</sub> H <sub>12</sub> .....    | S38 |
| <b>Figure S35.</b> Solid-state molecular structure of <b>4<sup>Fc</sup></b> -THF·C <sub>5</sub> H <sub>12</sub> .....          | S39 |
| <b>Figure S36.</b> Solid-state molecular structure of <b>4<sup>mes</sup></b> -DMAP·THF·0.5C <sub>5</sub> H <sub>12</sub> ..... | S40 |
| <b>Figure S37.</b> Solid-state molecular structure of <b>4<sup>tol</sup></b> -THF·3THF with space filling atoms.....           | S41 |
| <b>Table S1.</b> X-ray crystallographic data for uranyl complexes.....                                                         | S42 |
| <b>Figure S38.</b> Room temperature UV/vis absorption spectra for <b>2<sup>tol</sup></b> .....                                 | S43 |
| <b>Figure S39.</b> Room temperature UV/vis absorption spectra for <b>2<sup>anis</sup></b> .....                                | S44 |
| <b>Figure S40.</b> Room temperature UV/vis absorption spectra for <b>2<sup>mes</sup></b> .....                                 | S45 |
| <b>Figure S41.</b> Room temperature UV/vis absorption spectra for <b>2<sup>Fc</sup></b> .....                                  | S46 |
| <b>Figure S42.</b> Room temperature UV/vis absorption spectra for protonated dipyrins.....                                     | S47 |
| <b>Figure S43.</b> Room temperature UV/vis absorption spectra for sodium dipyrins.....                                         | S48 |
| <b>Figure S44.</b> Room temperature UV/vis absorption spectra for uranyl dipyrins.....                                         | S49 |
| <b>Table S2.</b> Table of UV/vis absorption spectral data.....                                                                 | S50 |
| <b>Figure S45.</b> Room temperature cyclic voltammogram of <b>4<sup>tol</sup></b> -DMAP in THF.....                            | S51 |
| <b>Figure S46.</b> Room temperature cyclic voltammogram of wave 1 of <b>4<sup>tol</sup></b> -DMAP in THF.....                  | S52 |
| <b>Figure S47.</b> Room temperature cyclic voltammogram of wave 2 of <b>4<sup>tol</sup></b> -DMAP in THF.....                  | S53 |

|                                                                                                                                       |     |
|---------------------------------------------------------------------------------------------------------------------------------------|-----|
| <b>Figure S48.</b> Room temperature cyclic voltammogram of wave 3 of $4^{\text{tol}}$ -DMAP in THF .....                              | S54 |
| <b>Figure S49.</b> Room temperature cyclic voltammogram of $4^{\text{anis}}$ -DMAP in THF .....                                       | S55 |
| <b>Figure S50.</b> Room temperature cyclic voltammogram of wave 1 of $4^{\text{anis}}$ -DMAP in THF .....                             | S56 |
| <b>Figure S51.</b> Room temperature cyclic voltammogram of wave 2 of $4^{\text{anis}}$ -DMAP in THF .....                             | S57 |
| <b>Figure S52.</b> Room temperature cyclic voltammogram of wave 3 of $4^{\text{anis}}$ -DMAP in THF .....                             | S58 |
| <b>Figure S53.</b> Room temperature cyclic voltammogram of $4^{\text{mes}}$ -DMAP in THF .....                                        | S59 |
| <b>Figure S54.</b> Room temperature cyclic voltammogram of wave 1 of $4^{\text{mes}}$ -DMAP in THF .....                              | S60 |
| <b>Figure S55.</b> Room temperature cyclic voltammogram of wave 2 of $4^{\text{mes}}$ -DMAP in THF .....                              | S61 |
| <b>Figure S56.</b> Room temperature cyclic voltammogram of wave 3 of $4^{\text{mes}}$ -DMAP in THF .....                              | S62 |
| <b>Figure S57.</b> Room temperature cyclic voltammogram of wave 4 of $4^{\text{mes}}$ -DMAP in THF .....                              | S63 |
| <b>Figure S58.</b> Room temperature cyclic voltammogram of $4^{\text{Fc}}$ -DMAP. ....                                                | S64 |
| <b>Figure S59.</b> Room temperature cyclic voltammogram of $4^{\text{Fc}}$ -DMAP in THF .....                                         | S65 |
| <b>Figure S60.</b> Room temperature cyclic voltammograms of $2^{\text{anis}}$ in THF .....                                            | S66 |
| <b>Figure S61.</b> Room temperature cyclic voltammogram of wave 1 of $2^{\text{anis}}$ in THF.....                                    | S67 |
| <b>Figure S62.</b> Room temperature cyclic voltammograms of $\text{UO}_2(\text{N}(\text{Si}(\text{CH}_3)_3)_2)_2(\text{THF})_2$ ..... | S68 |
| <b>Figure S63.</b> Fluorescence spectra.....                                                                                          | S69 |
| <b>Figure S64.</b> IR spectrum (KBr pellet) of $4^{\text{tol}}$ -DMAP.....                                                            | S70 |
| <b>Figure S65.</b> IR spectrum (KBr pellet) of $4^{\text{anis}}$ -DMAP .....                                                          | S71 |
| <b>Figure S66.</b> IR spectrum (KBr pellet) of $4^{\text{mes}}$ -DMAP .....                                                           | S72 |
| <b>Figure S67.</b> IR spectrum (KBr pellet) of $4^{\text{Fc}}$ -DMAP .....                                                            | S73 |
| <b>Figure S68.</b> IR spectra (KBr pellet) of uranyl bis(dipyrrin) complexes.....                                                     | S74 |

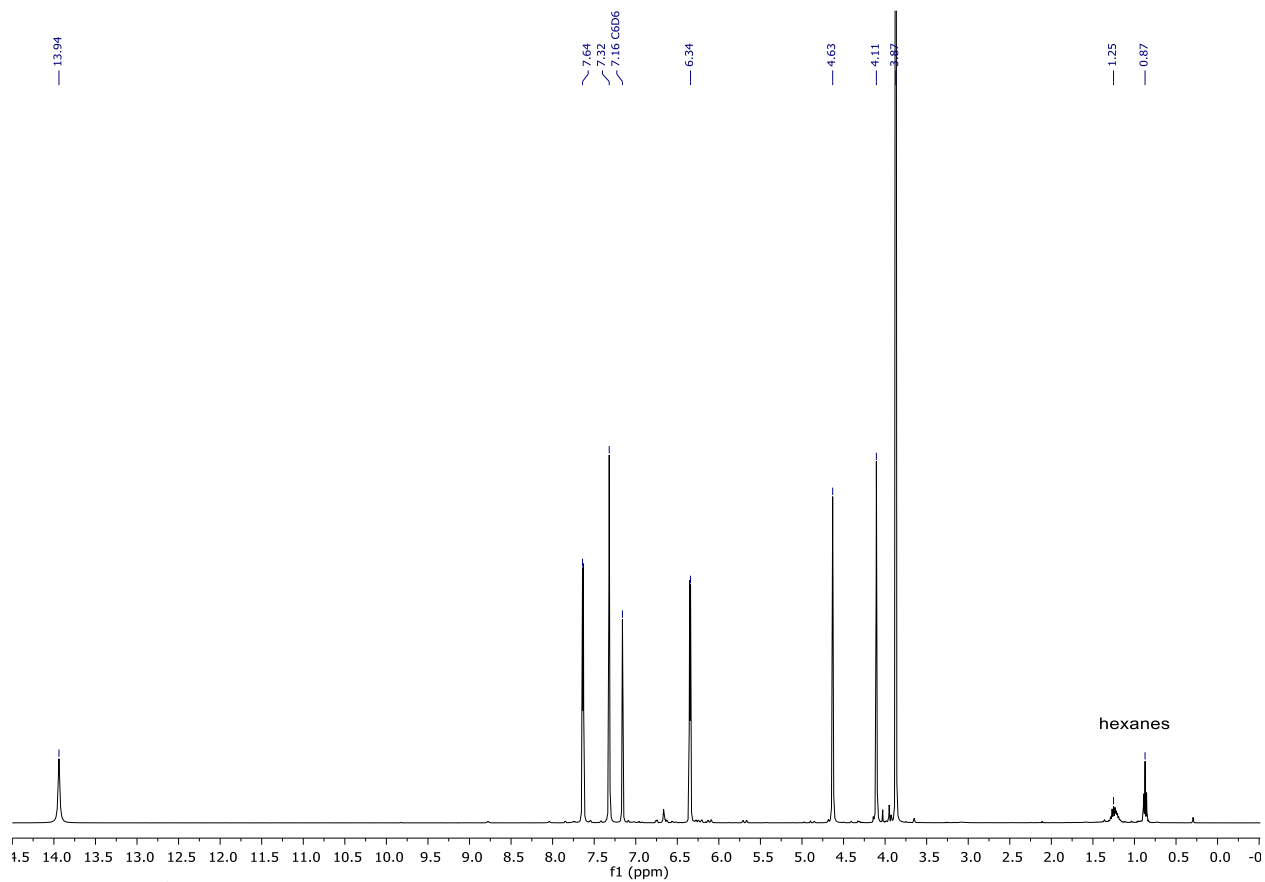

**Figure S1.**  $^1\text{H}$  NMR spectrum of  $2^{\text{Fc}}$  in  $\text{C}_6\text{D}_6$ .

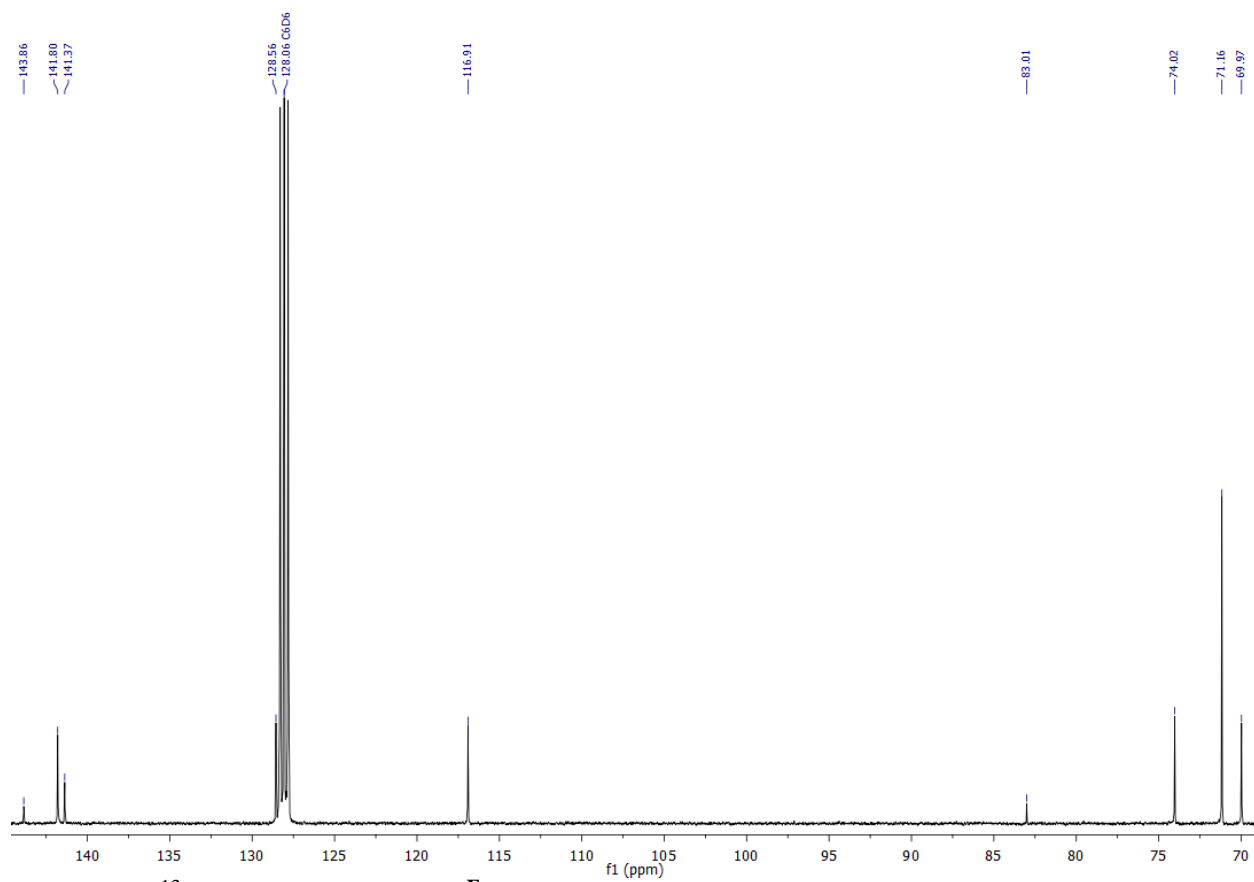

**Figure S2.**  $^{13}\text{C}$  NMR spectrum of  $2^{\text{Fc}}$  in  $\text{C}_6\text{D}_6$ .

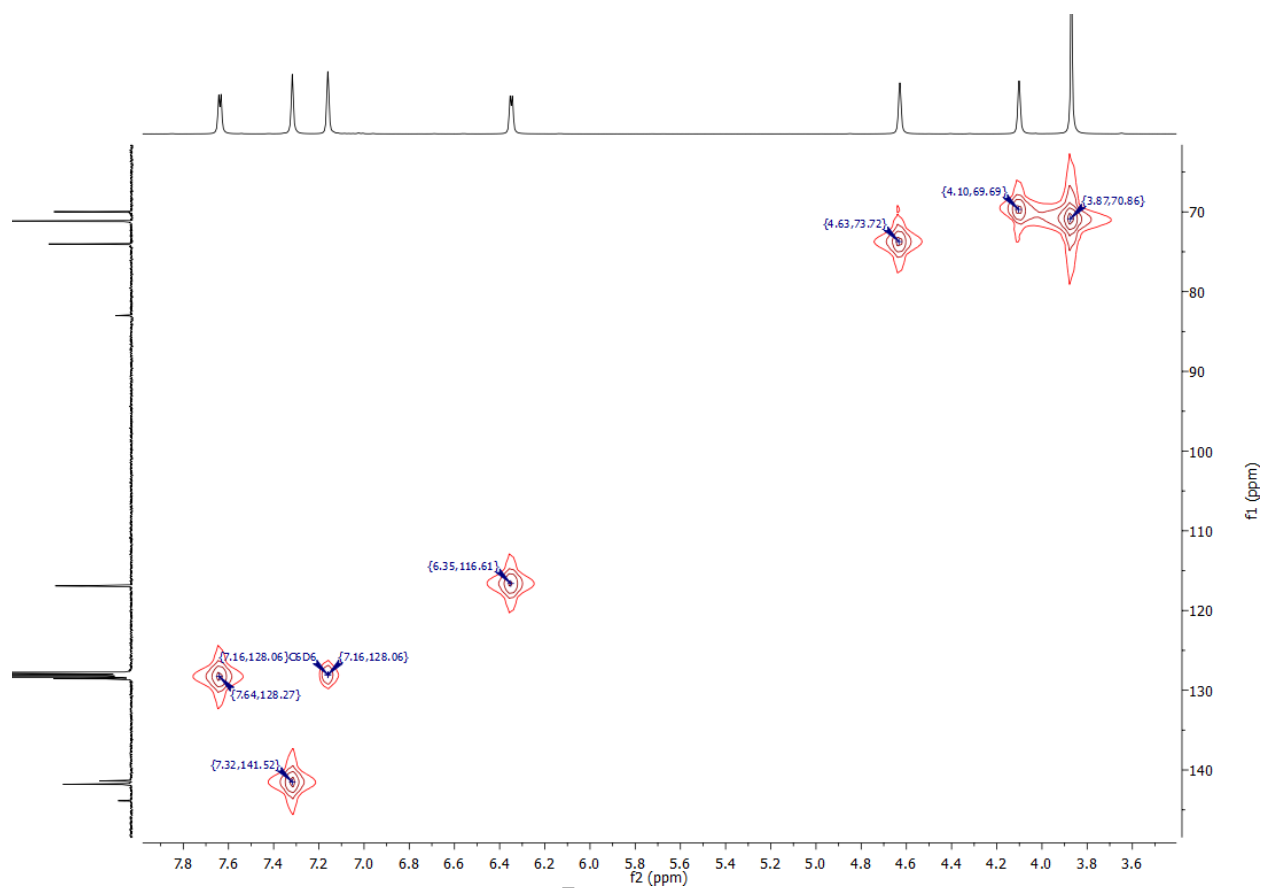

**Figure S3.** HMQCGP NMR spectrum of  $2^{Fc}$  in  $C_6D_6$ .

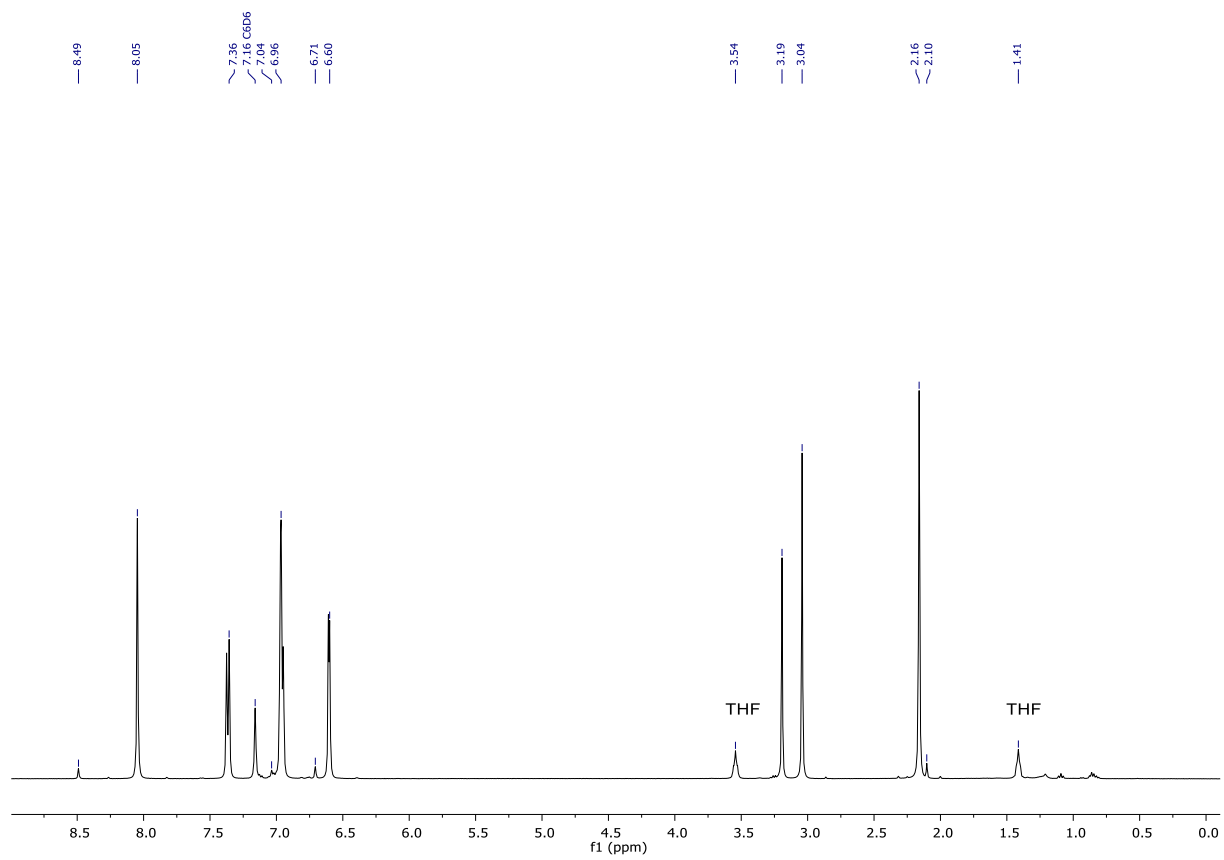

**Figure S4.**  $^1\text{H}$  NMR spectrum of  $3^{\text{tol}}$  in  $\text{C}_6\text{D}_6/\text{py}-d_5$ .



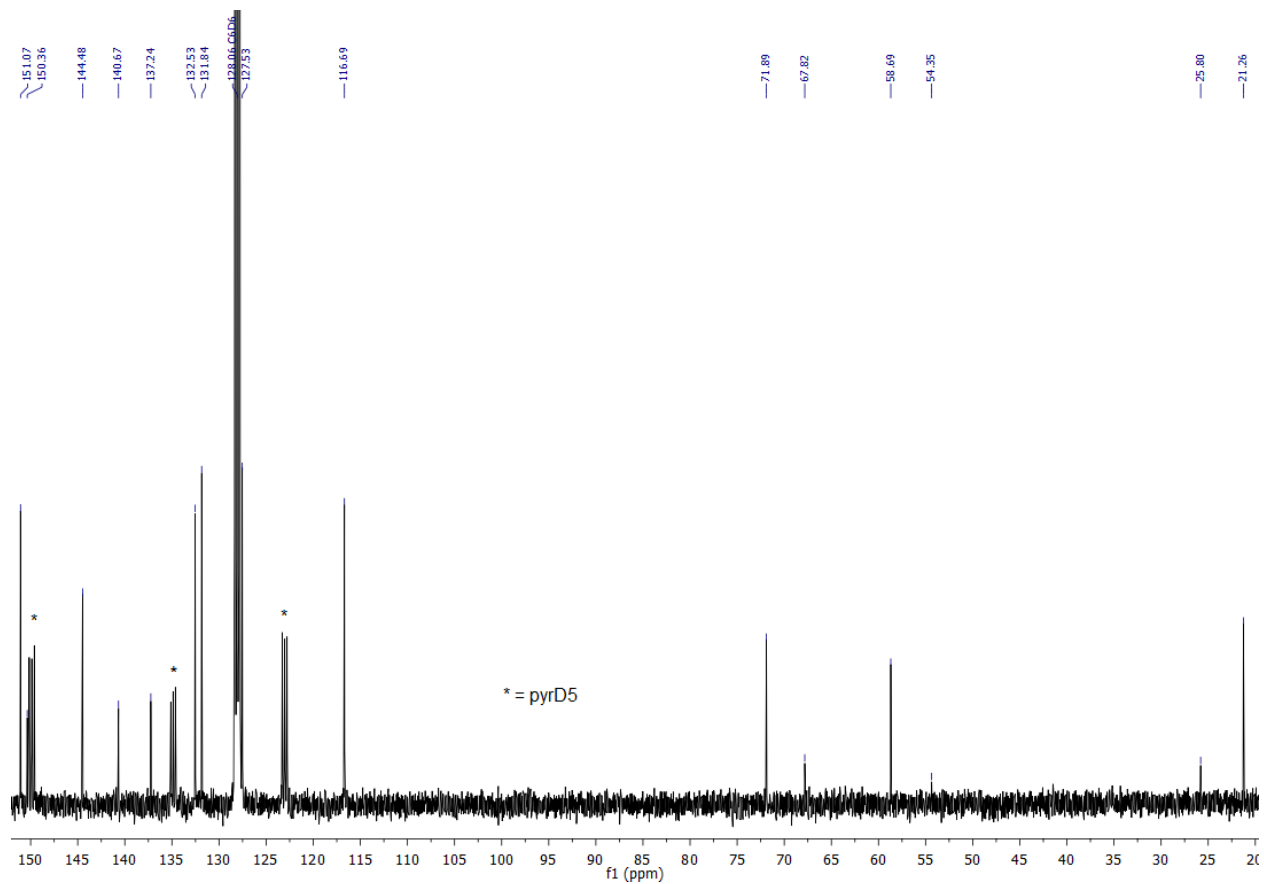

Figure S5.  $^{13}\text{C}$  NMR spectrum of  $3^{\text{tol}}$  in  $\text{C}_6\text{D}_6/\text{py}-d_5$ .

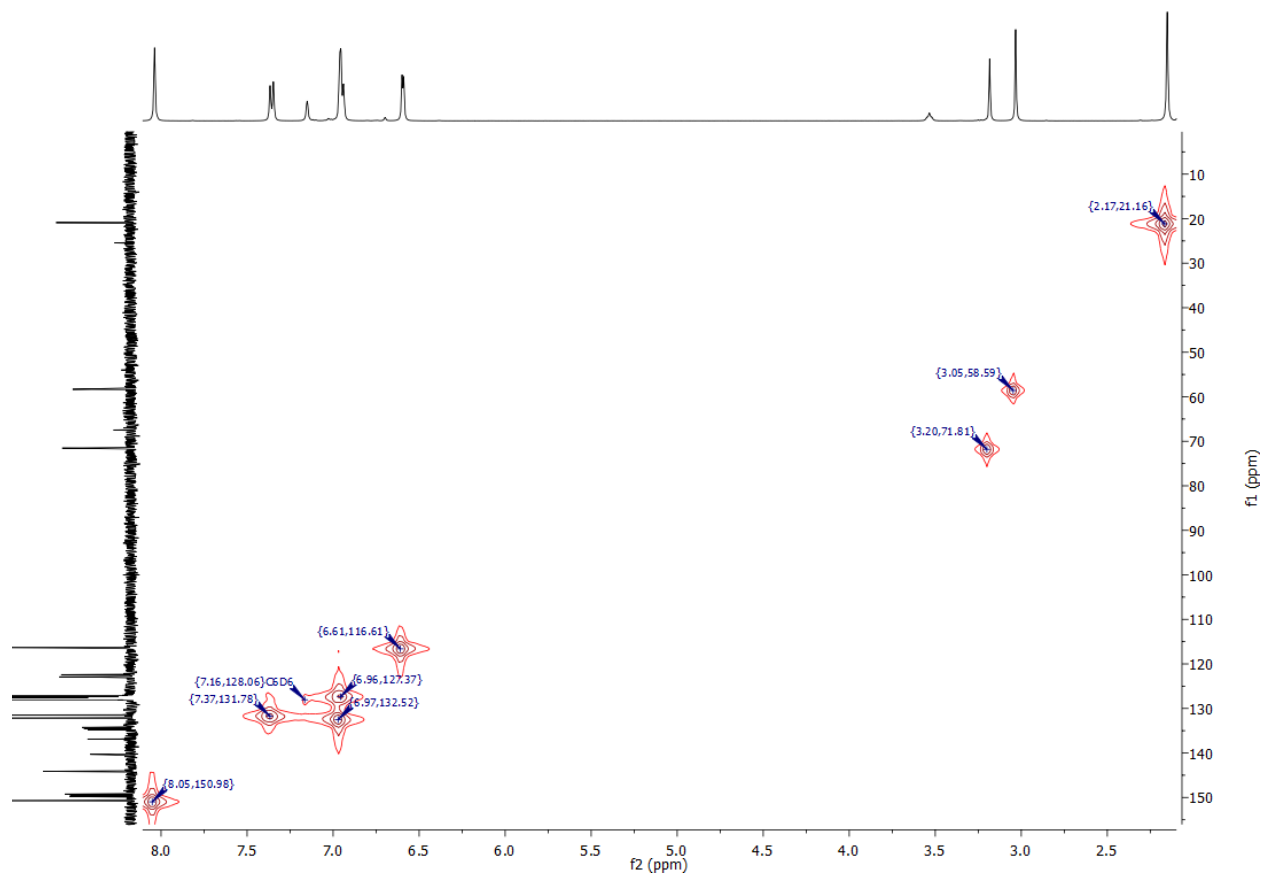

Figure S6. HMQCGP NMR spectrum of  $3^{\text{tol}}$  in  $\text{C}_6\text{D}_6/\text{py}-d_5$ .

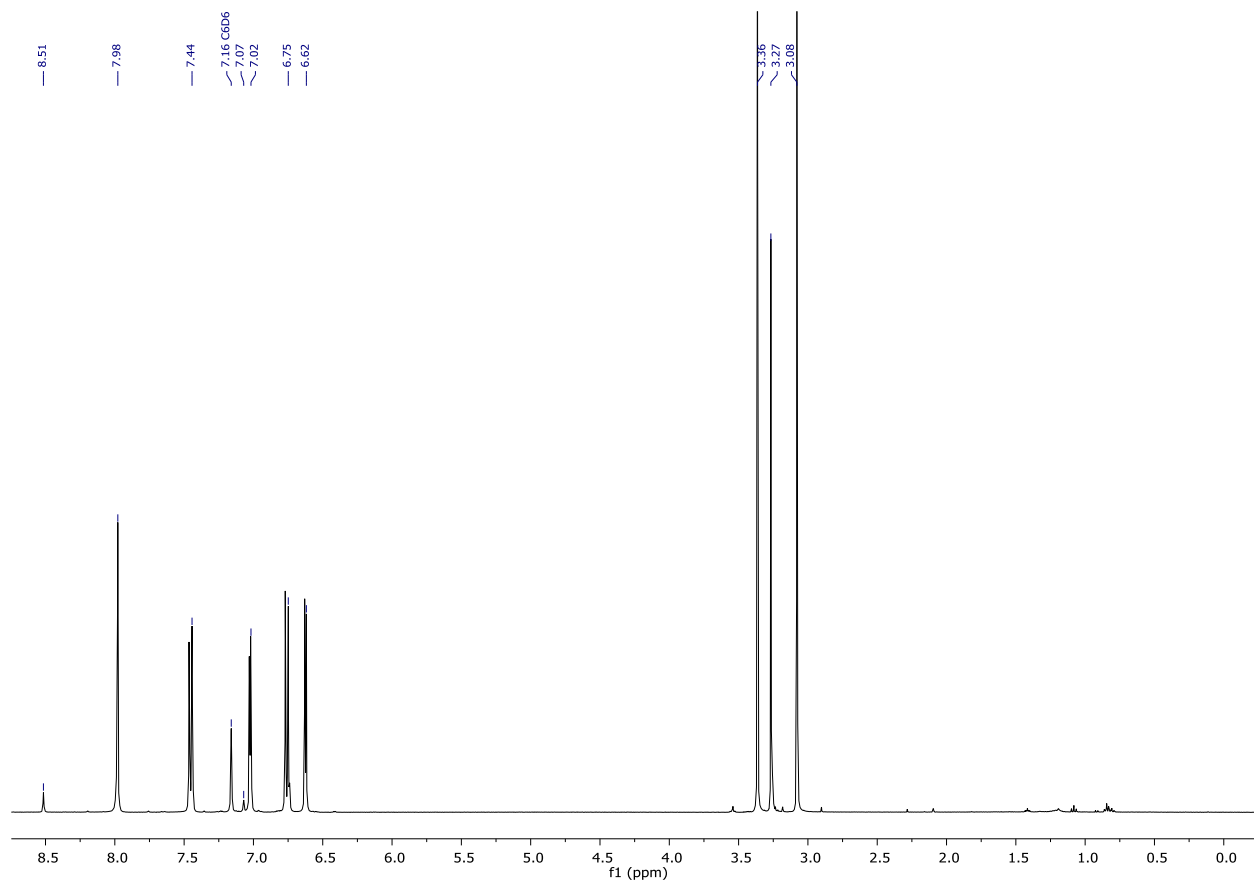

**Figure S7.**  $^1\text{H}$  NMR spectrum of **3**<sup>anis</sup> in  $\text{C}_6\text{D}_6/\text{py-}d_5$ .

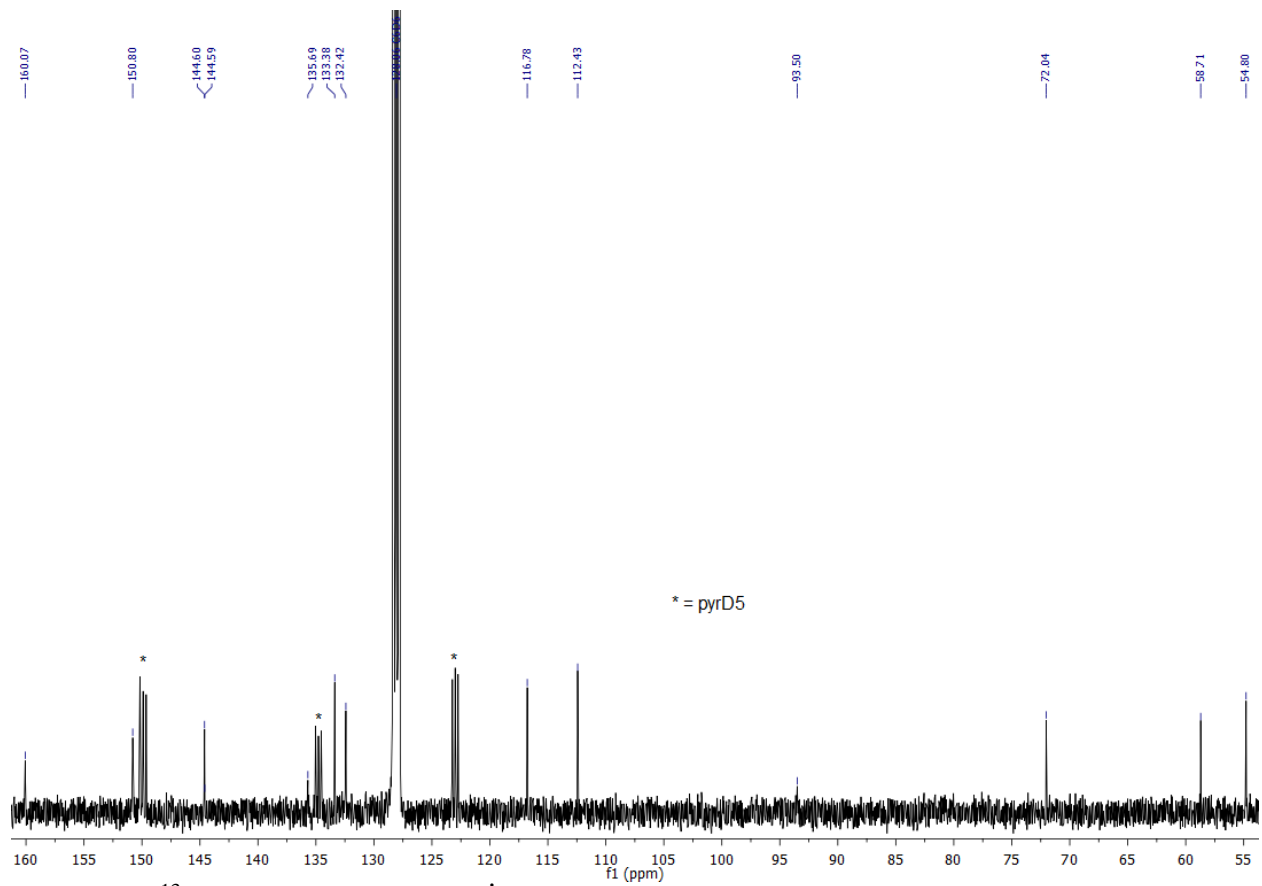

Figure S8.  $^{13}\text{C}$  NMR spectrum of  $\mathbf{3}^{\text{anis}}$  in  $\text{C}_6\text{D}_6/\text{py}-d_5$ .

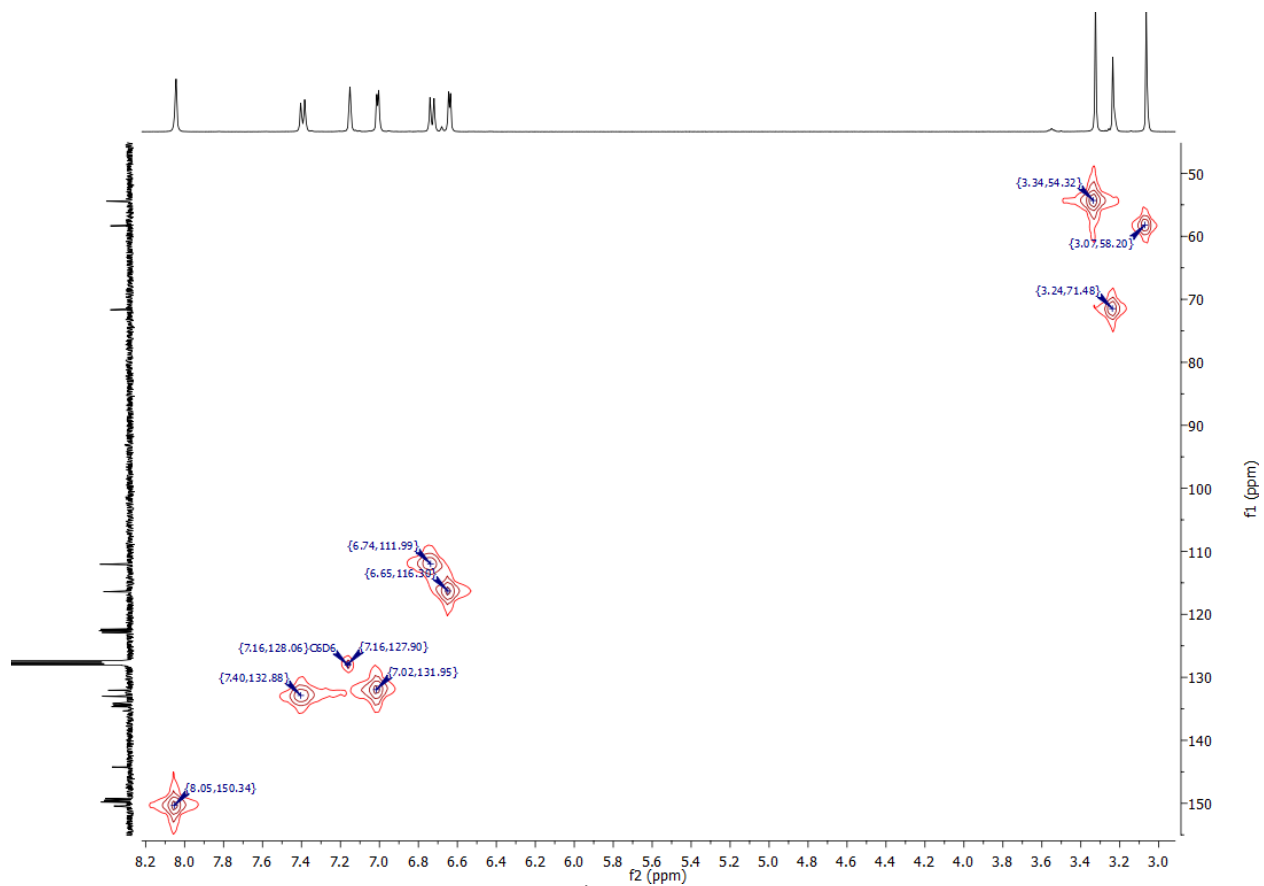

Figure S9. HMQCGP NMR spectrum of **3<sup>anis</sup>** in  $C_6D_6/py-d_5$ .

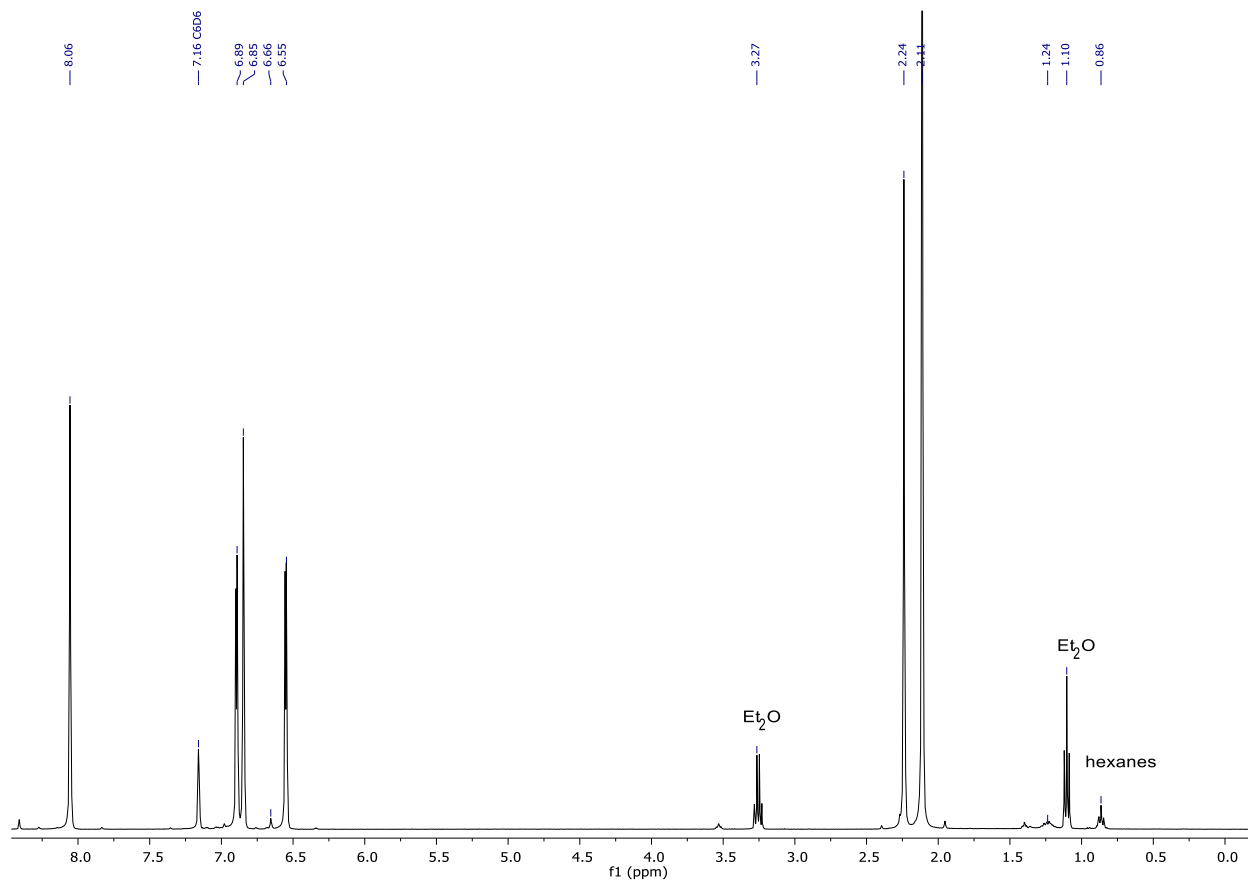

**Figure S10.** <sup>1</sup>H NMR spectrum of **3<sup>mes</sup>** in C<sub>6</sub>D<sub>6</sub>/py-*d*<sub>5</sub>.

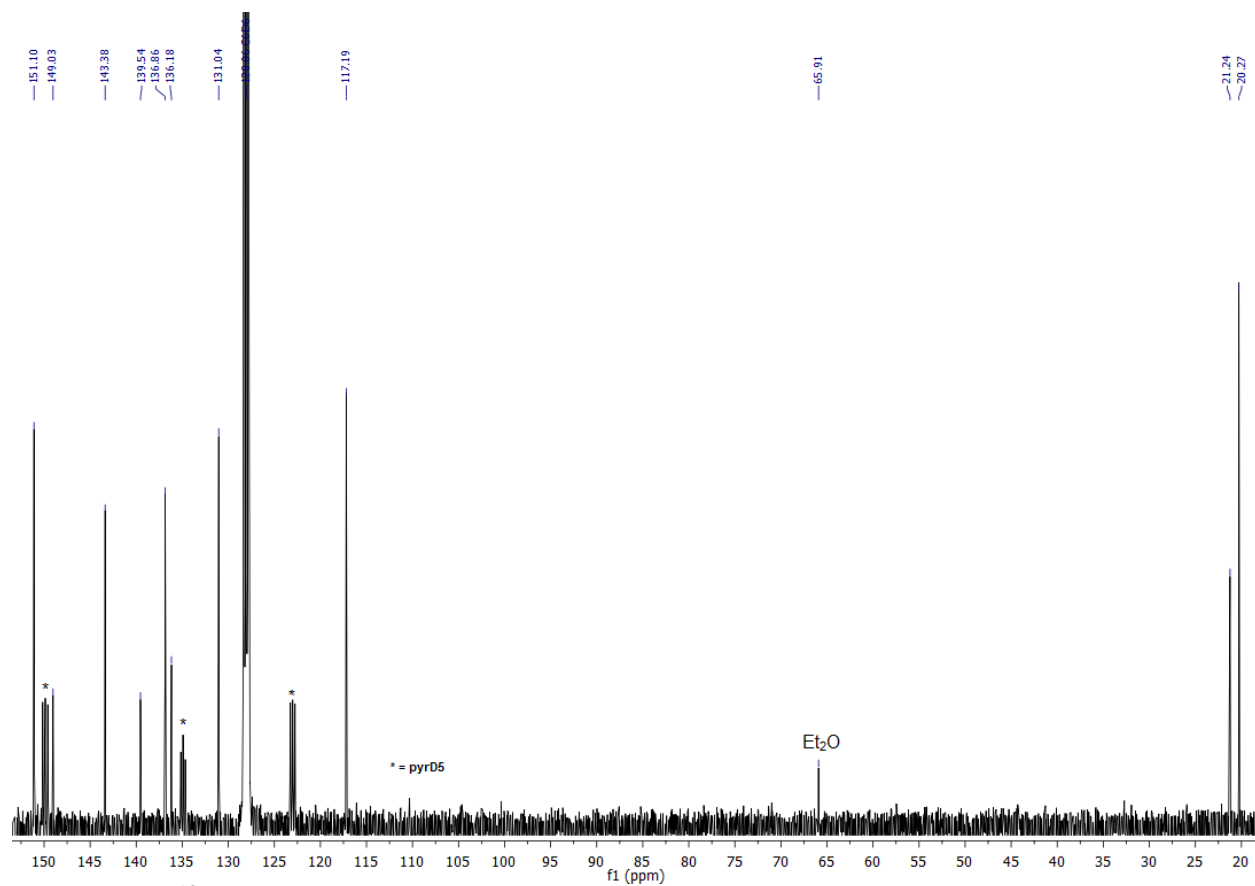

Figure S11.  $^{13}\text{C}$  NMR spectrum of  $\mathbf{3}^{\text{mes}}$  in  $\text{C}_6\text{D}_6/\text{py}-d_5$ .

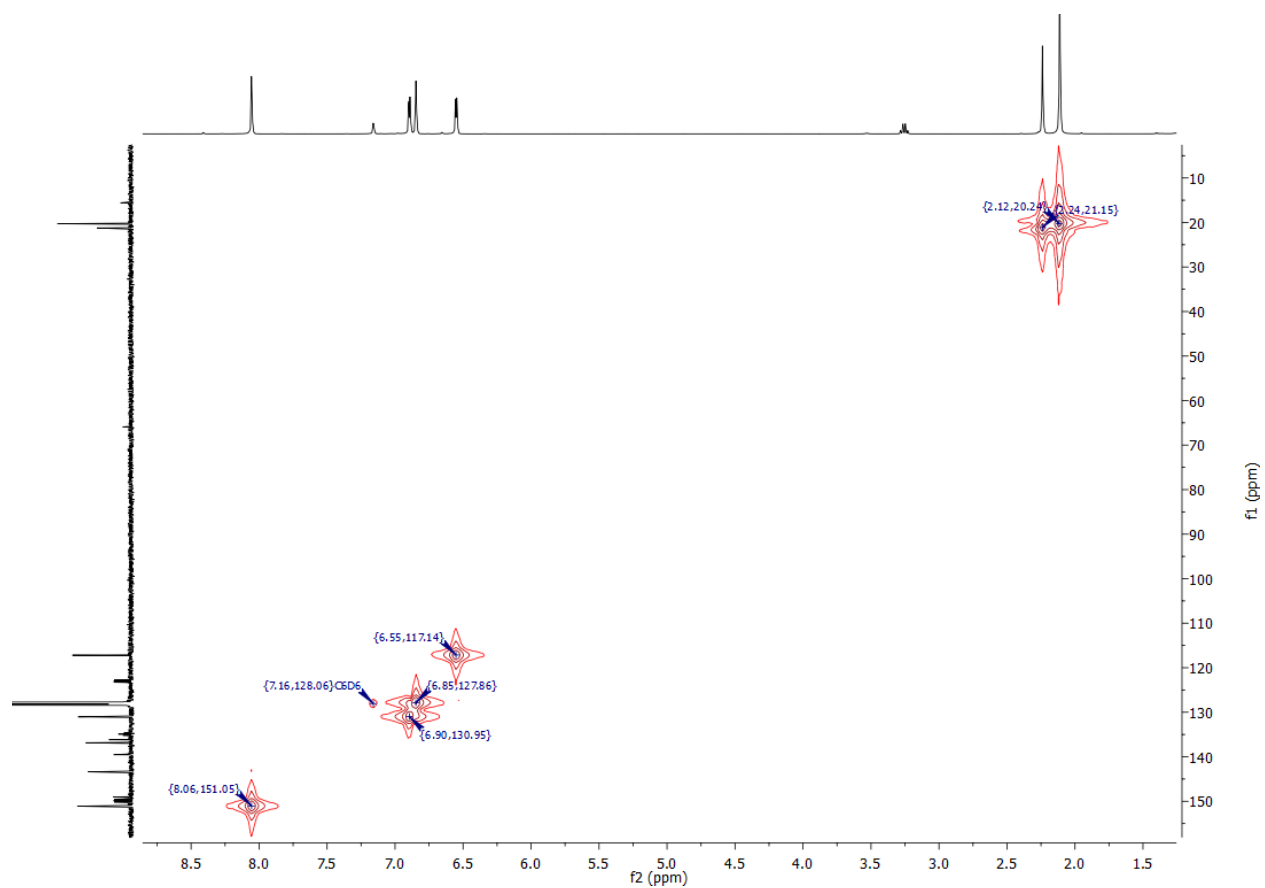

Figure S12. HMQCGP NMR spectrum of  $3^{\text{mes}}$  in  $\text{C}_6\text{D}_6/\text{py}-d_5$ .



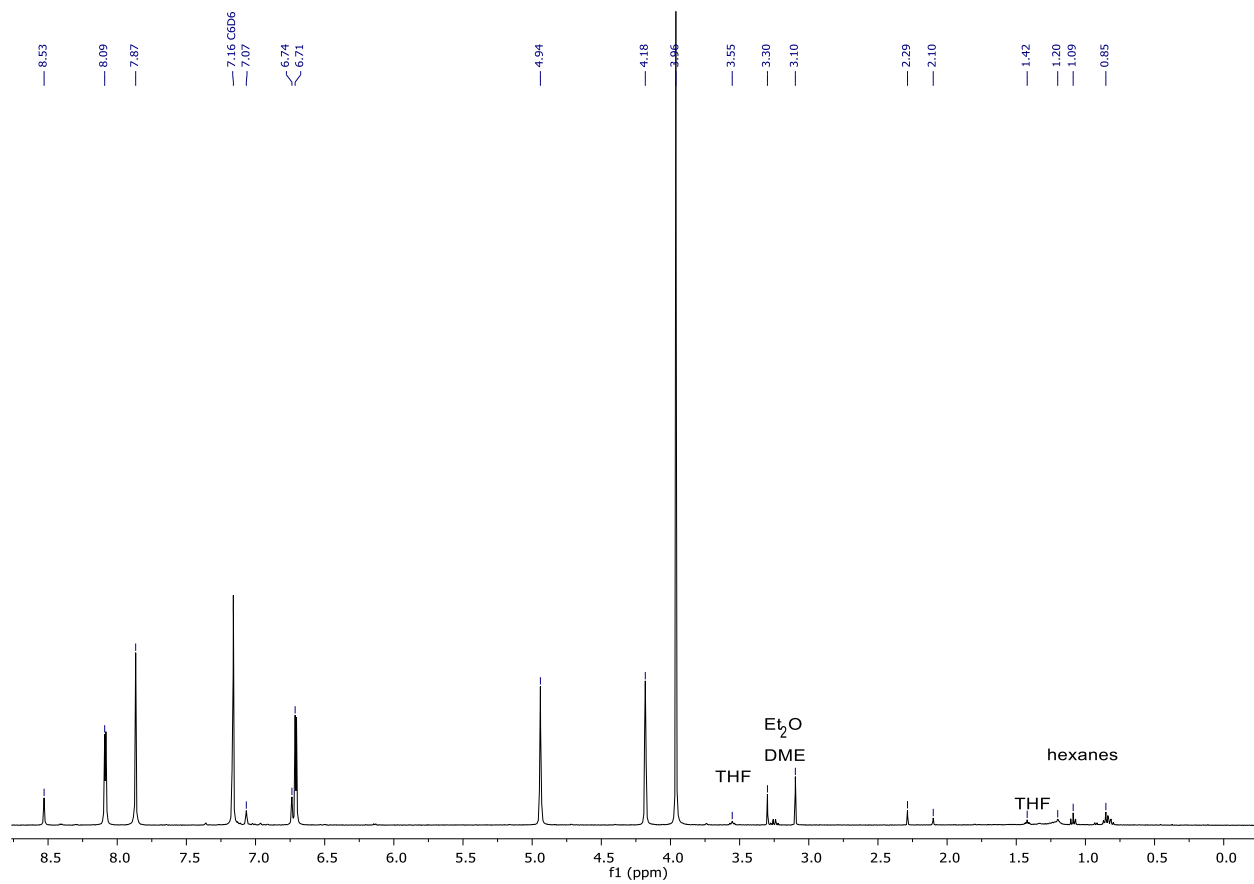

**Figure S13.**  $^1\text{H}$  NMR spectrum of  $3^{\text{Fc}}$  in  $\text{C}_6\text{D}_6/\text{py}-d_5$ .

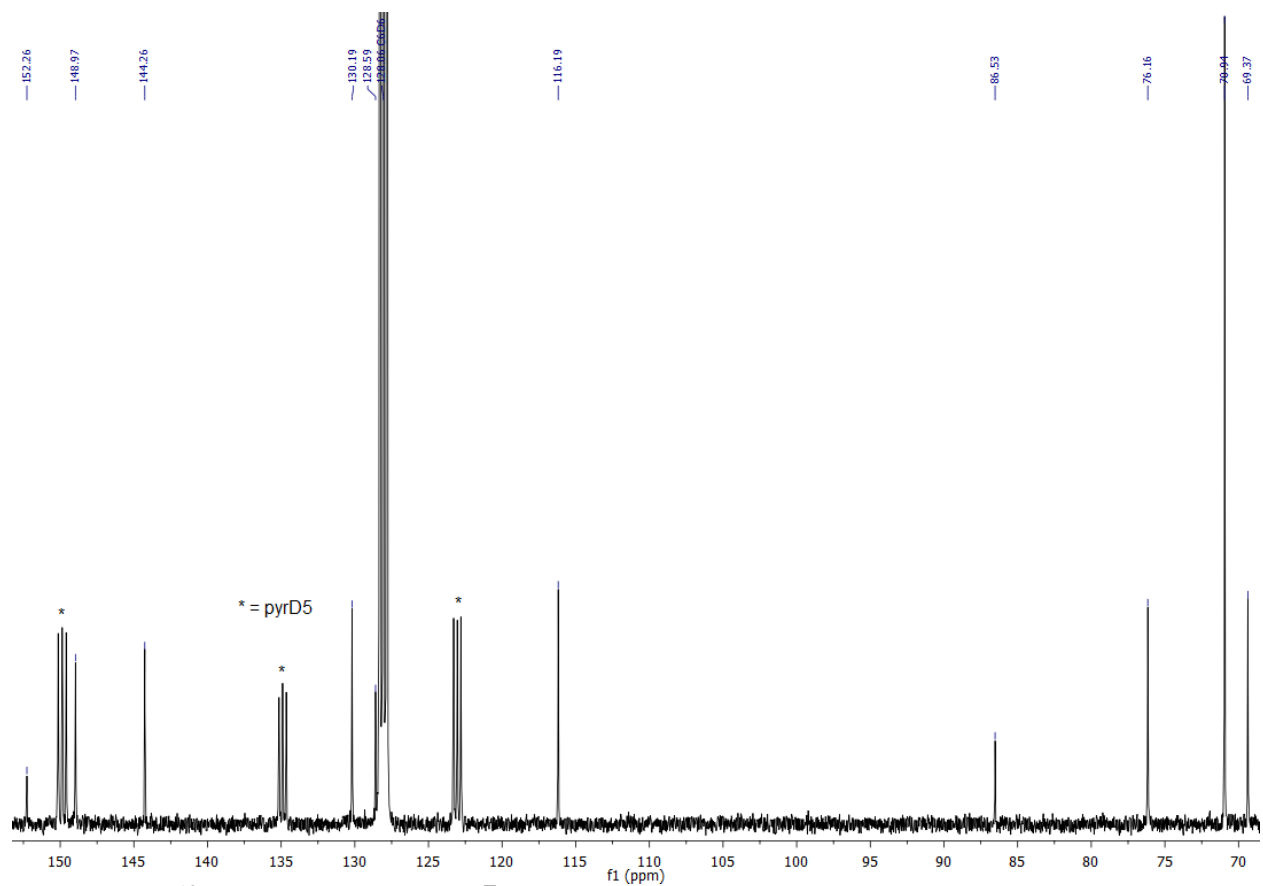

Figure S14.  $^{13}\text{C}$  NMR spectrum of  $3^{\text{Fc}}$  in  $\text{C}_6\text{D}_6/\text{py}-d_5$ .

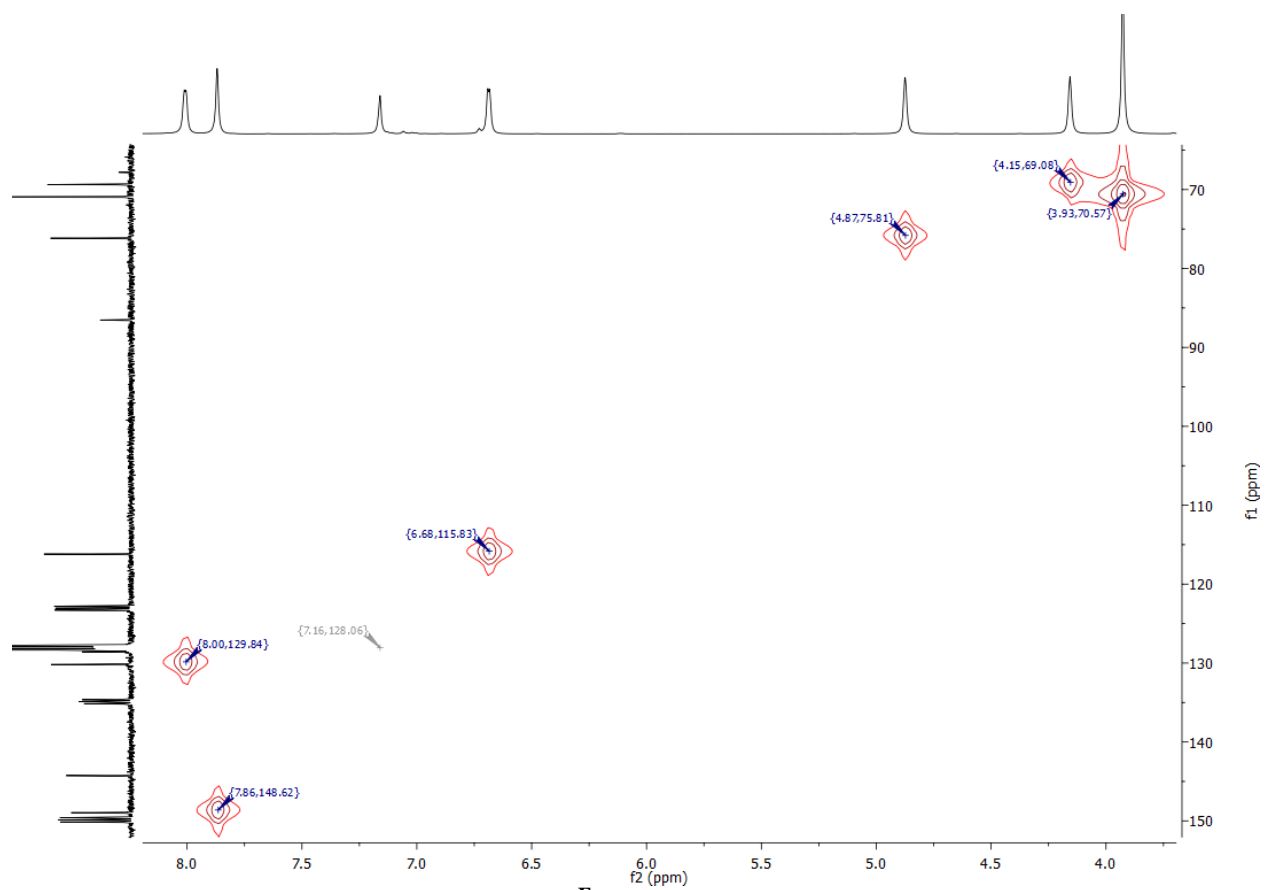

Figure S15. HMQCGP NMR spectrum of  $3^{\text{Fc}}$  in  $\text{C}_6\text{D}_6/\text{py}-d_5$ .

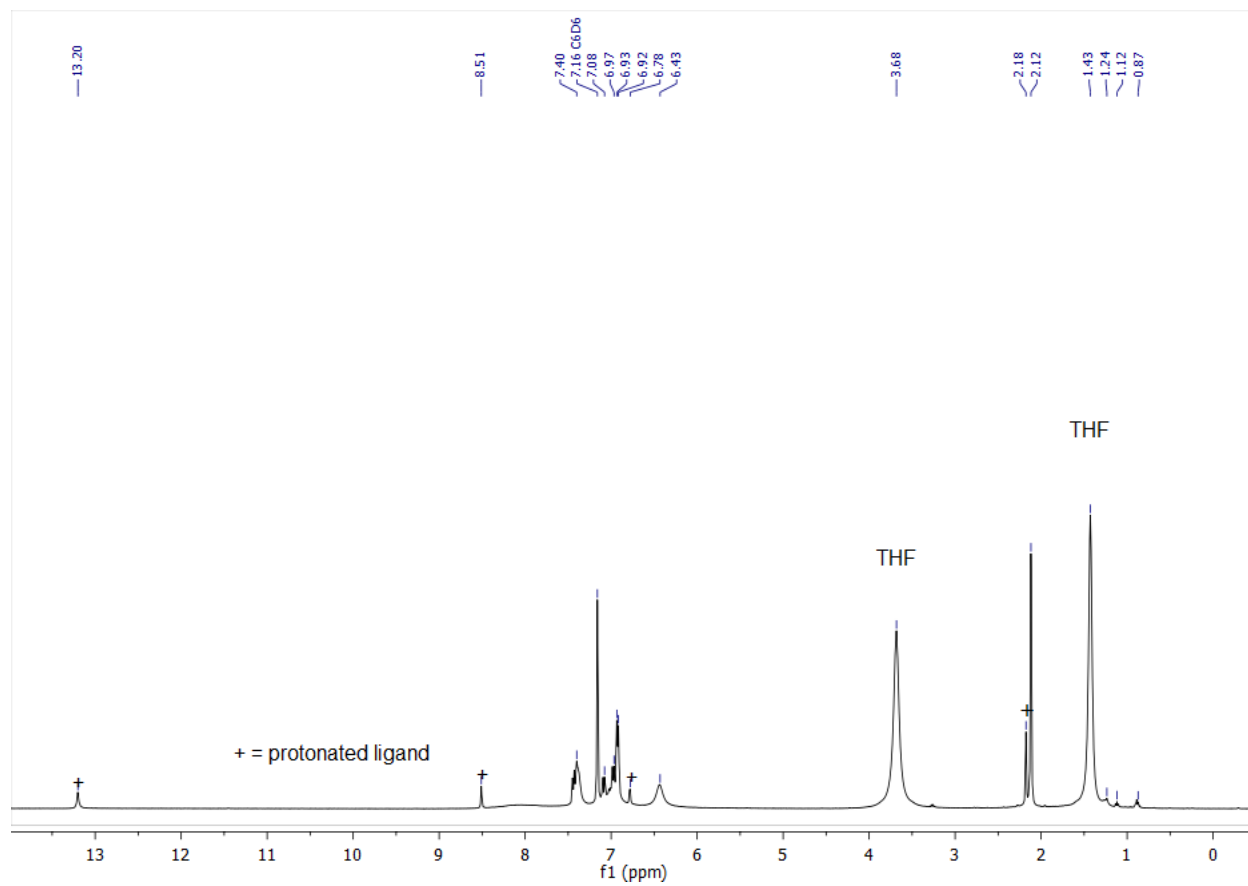

**Figure S16.**  $^1\text{H}$  NMR spectrum of  $4^{\text{tol}}$ -THF in  $\text{C}_6\text{D}_6/\text{py}-d_5$ .

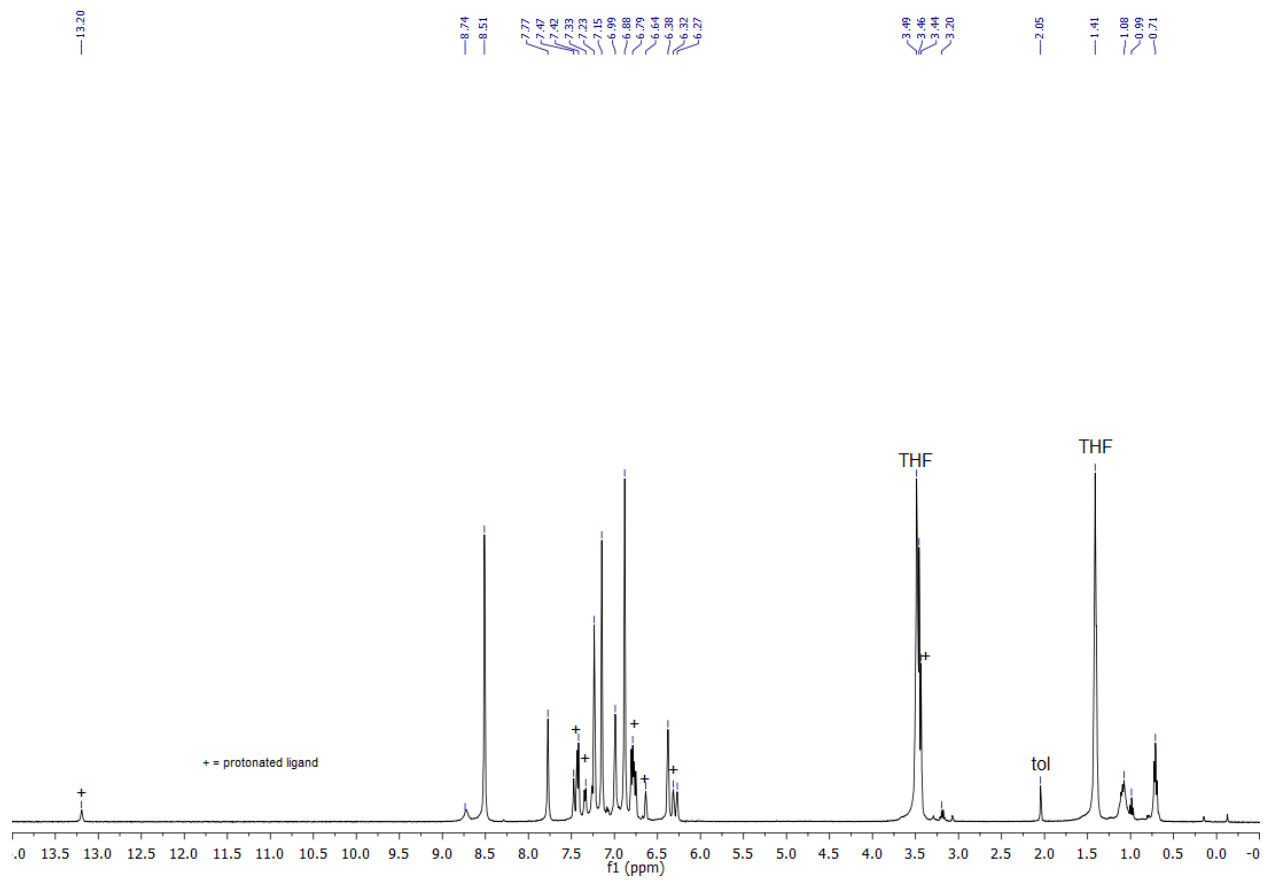

**Figure S17.**  $^1\text{H}$  NMR spectrum of  $4^{\text{anis}}$ -THF in  $\text{py-d}_5$ .

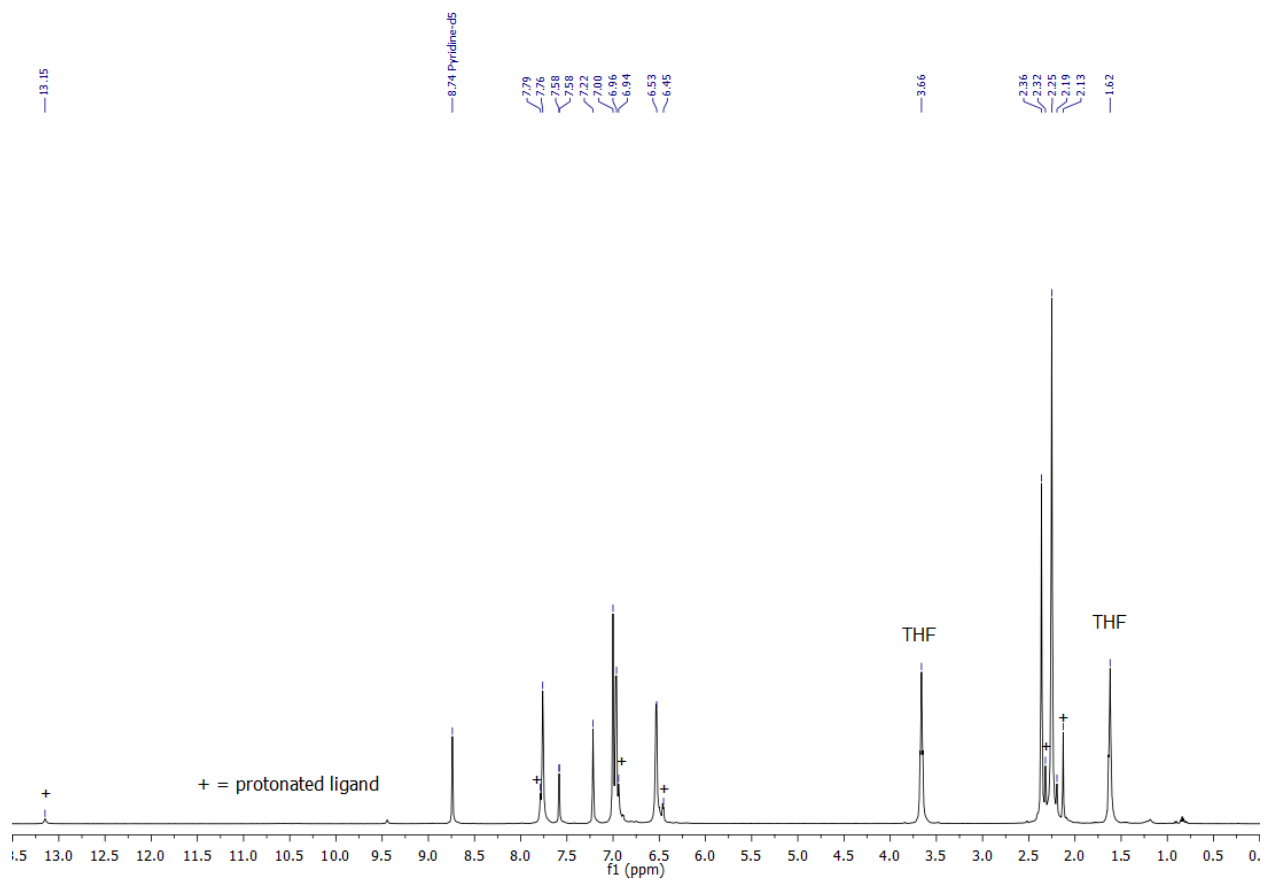

**Figure S18.**  $^1\text{H}$  NMR spectrum of  $4^{\text{mes}}$ -THF in  $\text{py-}d_5$ .

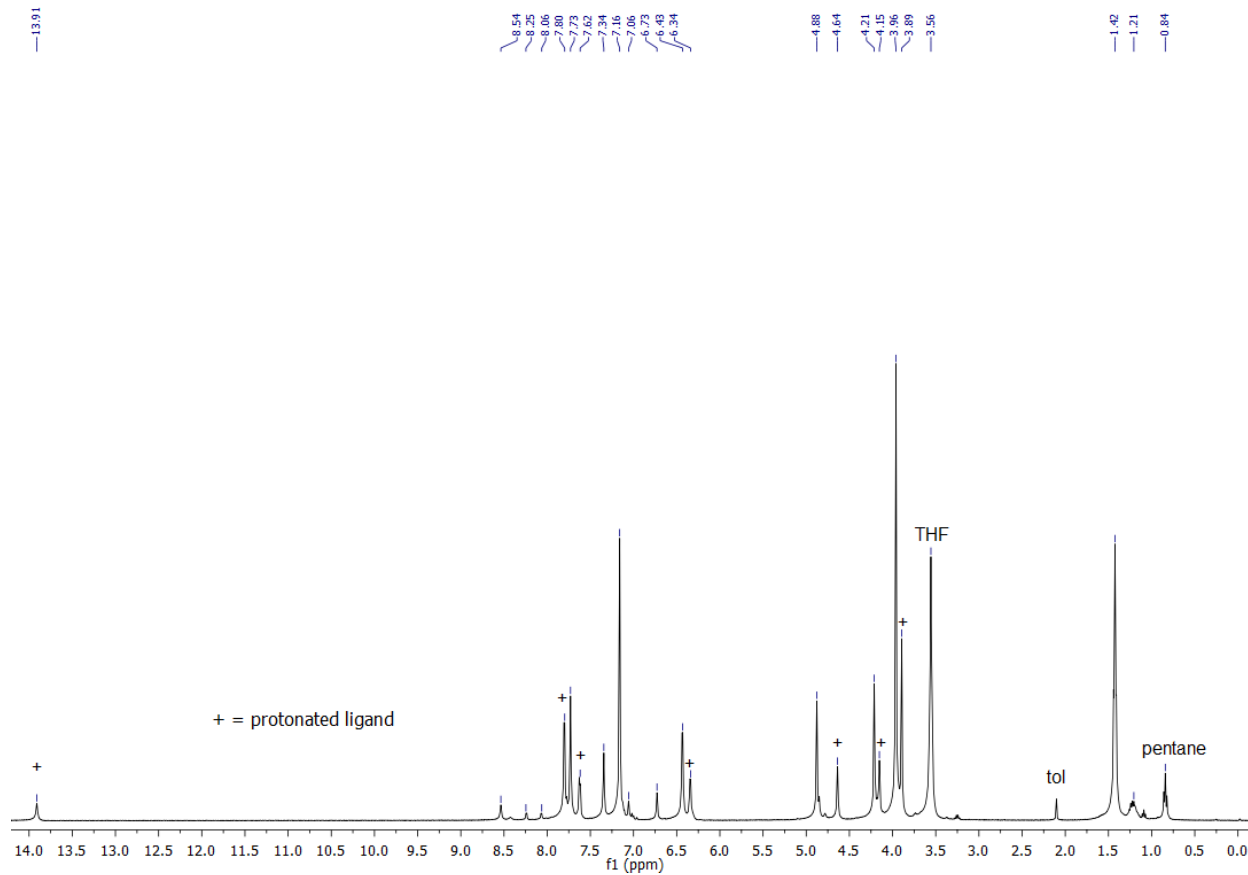

**Figure S19.**  $^1\text{H}$  NMR spectrum of  $4^{\text{Fc}}$ -THF in  $\text{C}_6\text{D}_6/\text{py}-d_5$ .

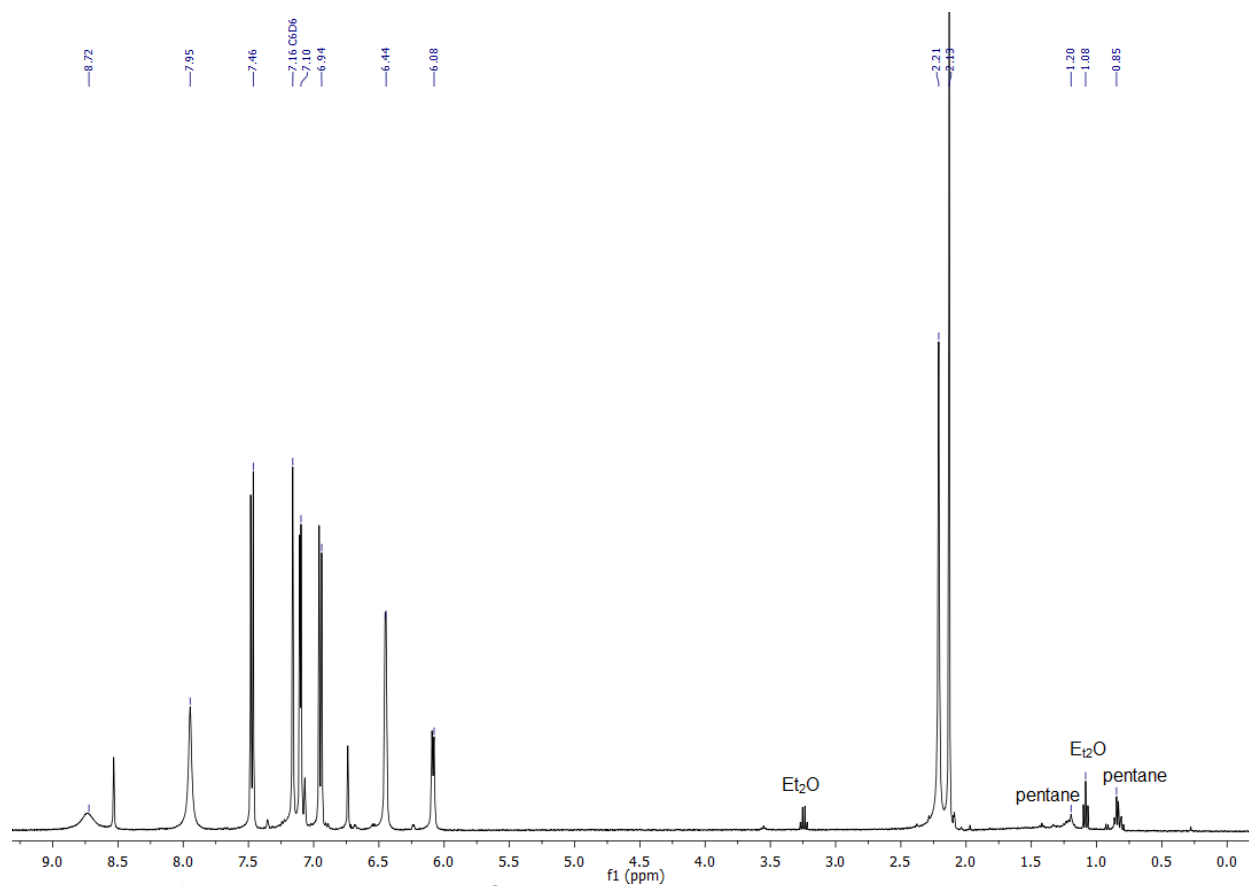

**Figure S20.**  $^1\text{H}$  NMR spectrum of 4<sup>tol</sup>-DMAP in  $\text{C}_6\text{D}_6/\text{py-}d_5$ .



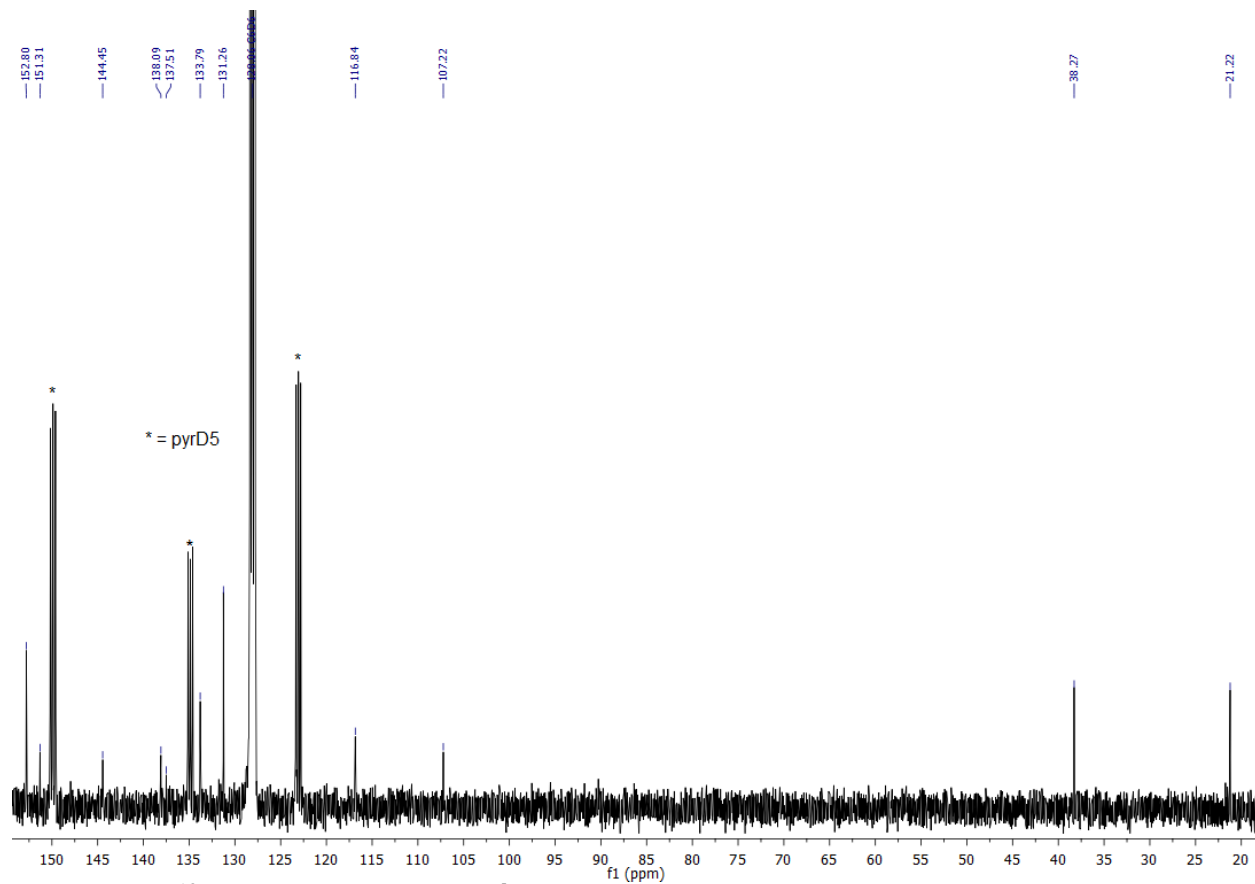

Figure S21.  $^{13}\text{C}$  NMR spectrum of  $4^{\text{tol}}$ -DMAP in  $\text{C}_6\text{D}_6/\text{py}-d_5$ .

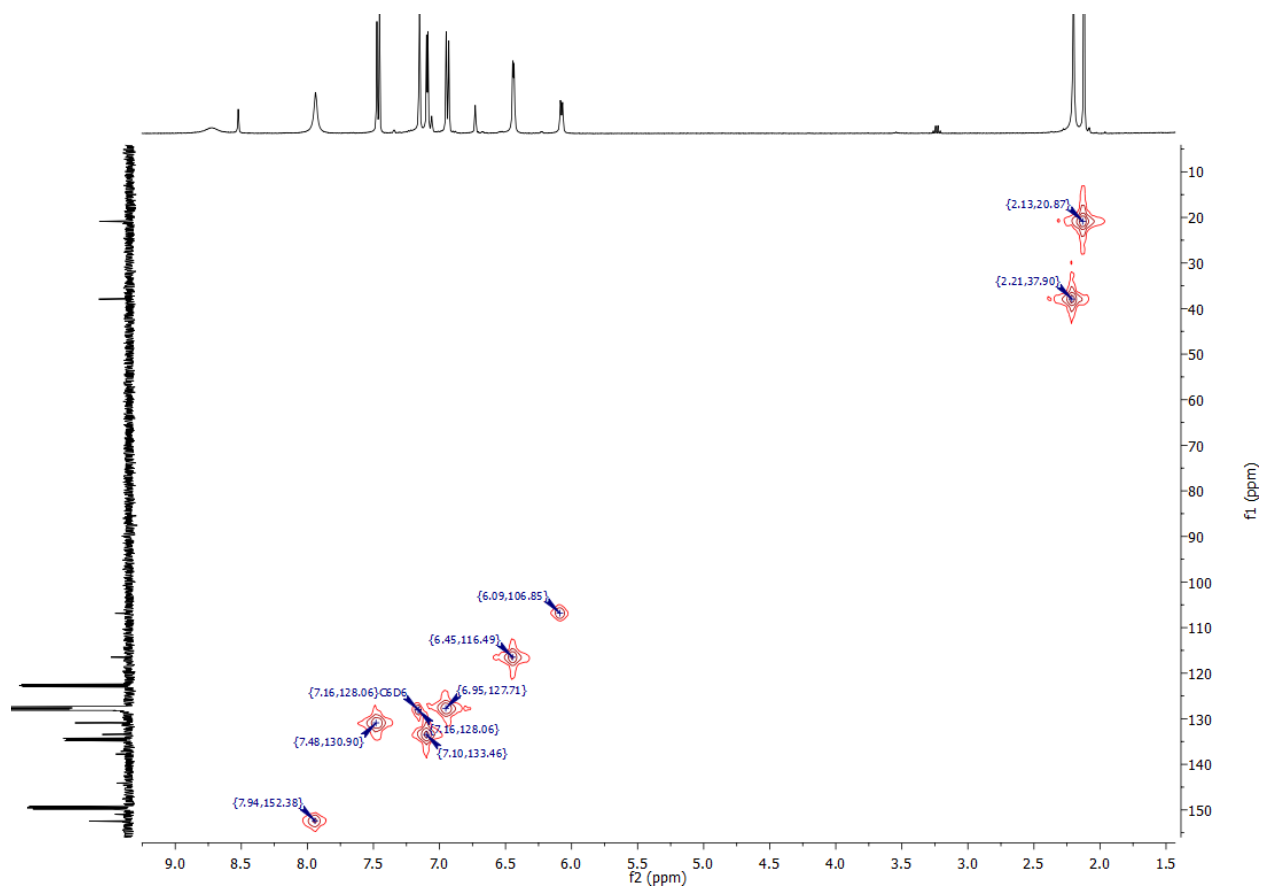

Figure S22. HMQCGP NMR spectrum of **4<sup>tol</sup>**-DMAP in C<sub>6</sub>D<sub>6</sub>/py-*d*<sub>5</sub>.

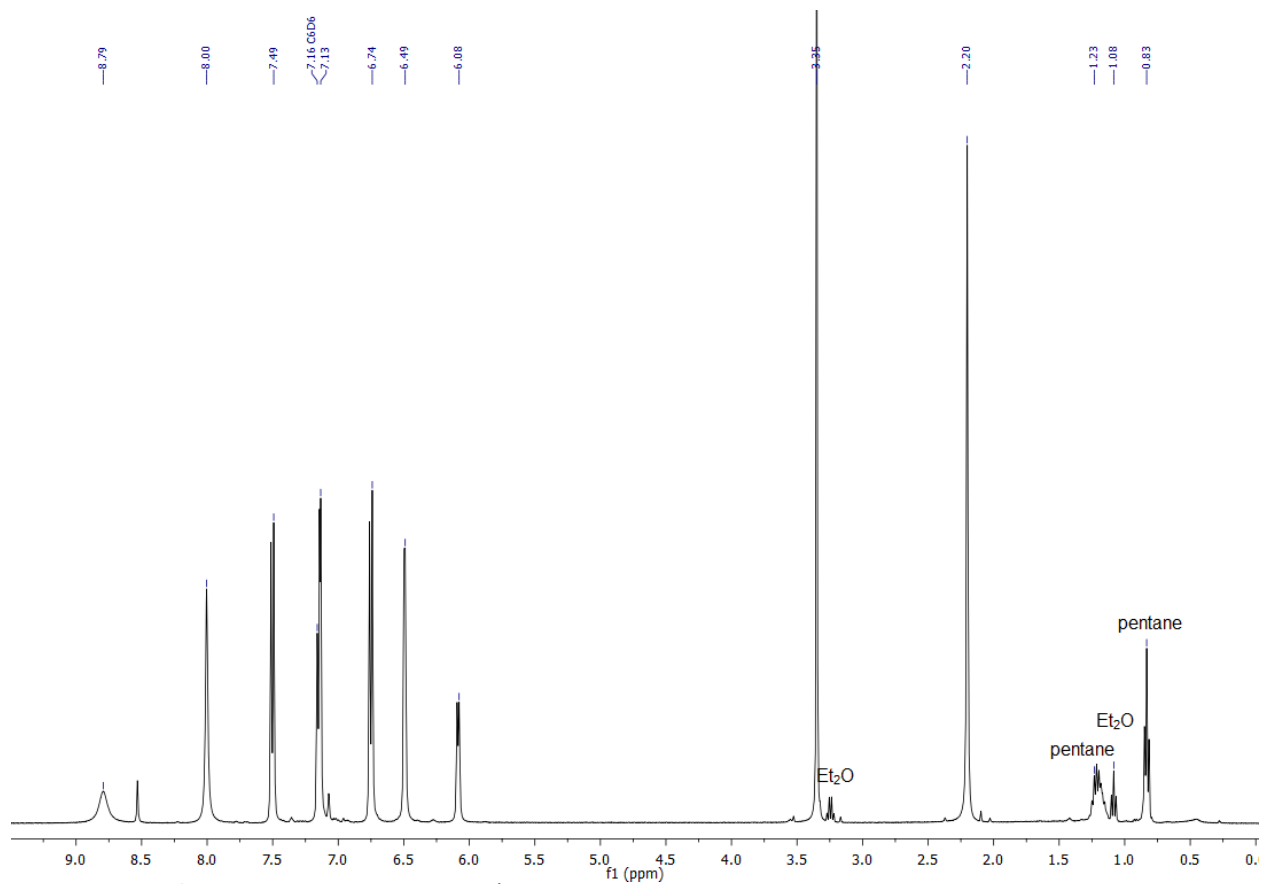

**Figure S23.**  $^1\text{H}$  NMR spectrum of **4**<sup>anis</sup>-DMAP in  $\text{C}_6\text{D}_6/\text{py}-d_5$ .

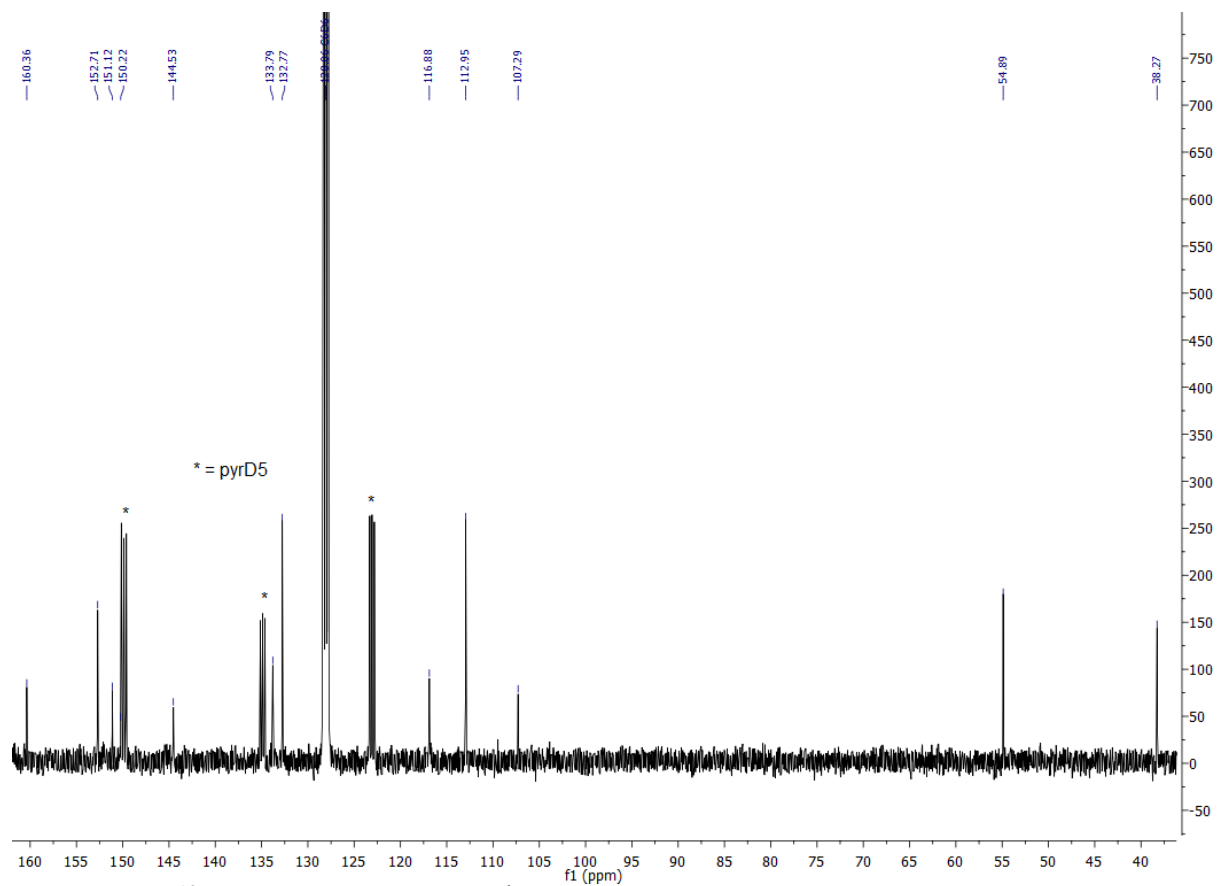

**Figure S24.**  $^{13}\text{C}$  NMR spectrum of 4<sup>anis</sup>-DMAP in  $\text{C}_6\text{D}_6/\text{py}-d_5$ .

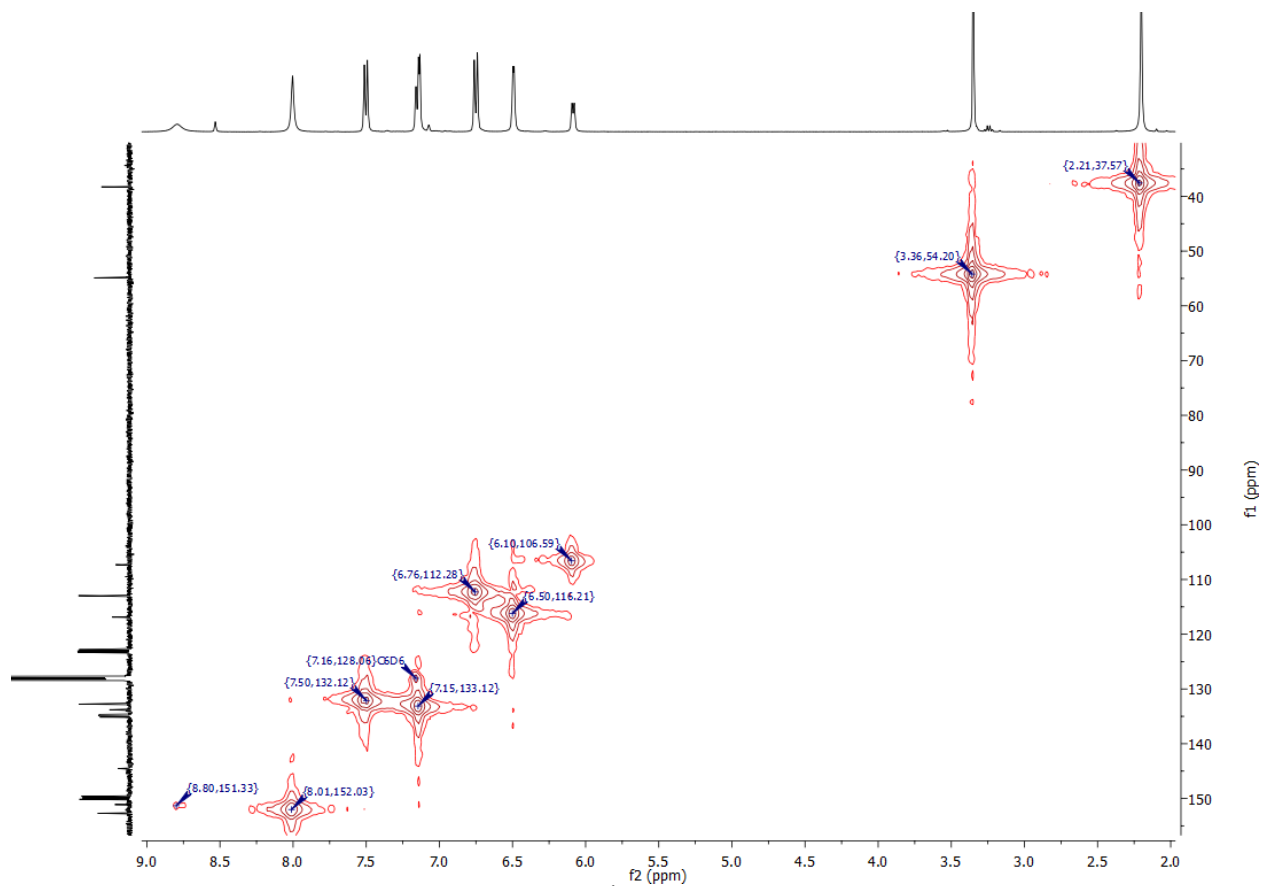

Figure S25. HMQC NMR spectrum of 4<sup>anis</sup>DMAP in C<sub>6</sub>D<sub>6</sub>/py-d<sub>5</sub>.

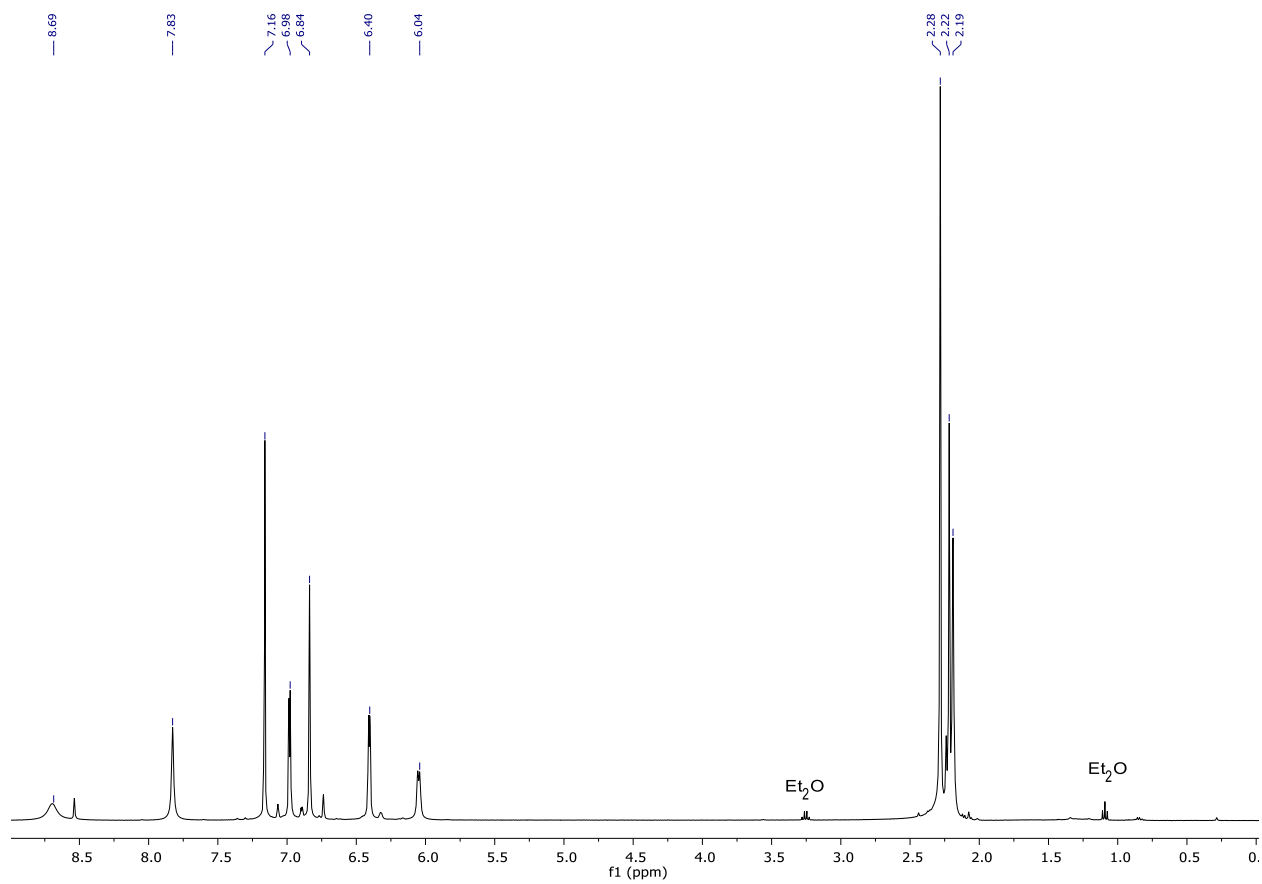

**Figure S26.**  $^1\text{H}$  NMR spectrum of  $4^{\text{mes}}$ -DMAP in  $\text{C}_6\text{D}_6/\text{py}-d_5$ .

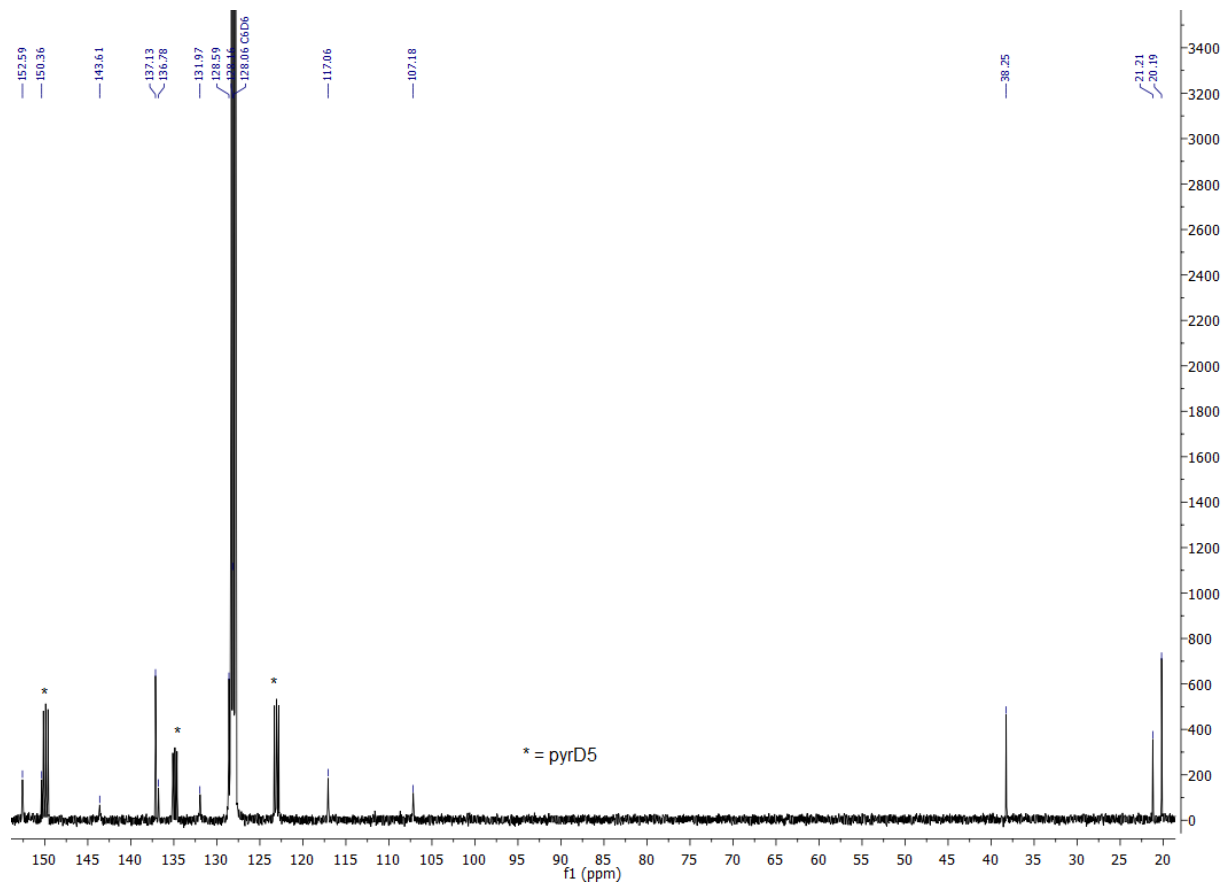

**Figure S27.**  $^{13}\text{C}$  NMR spectrum of  $4^{\text{mes}}$ -DMAP in  $\text{C}_6\text{D}_6/\text{py-}d_5$ .

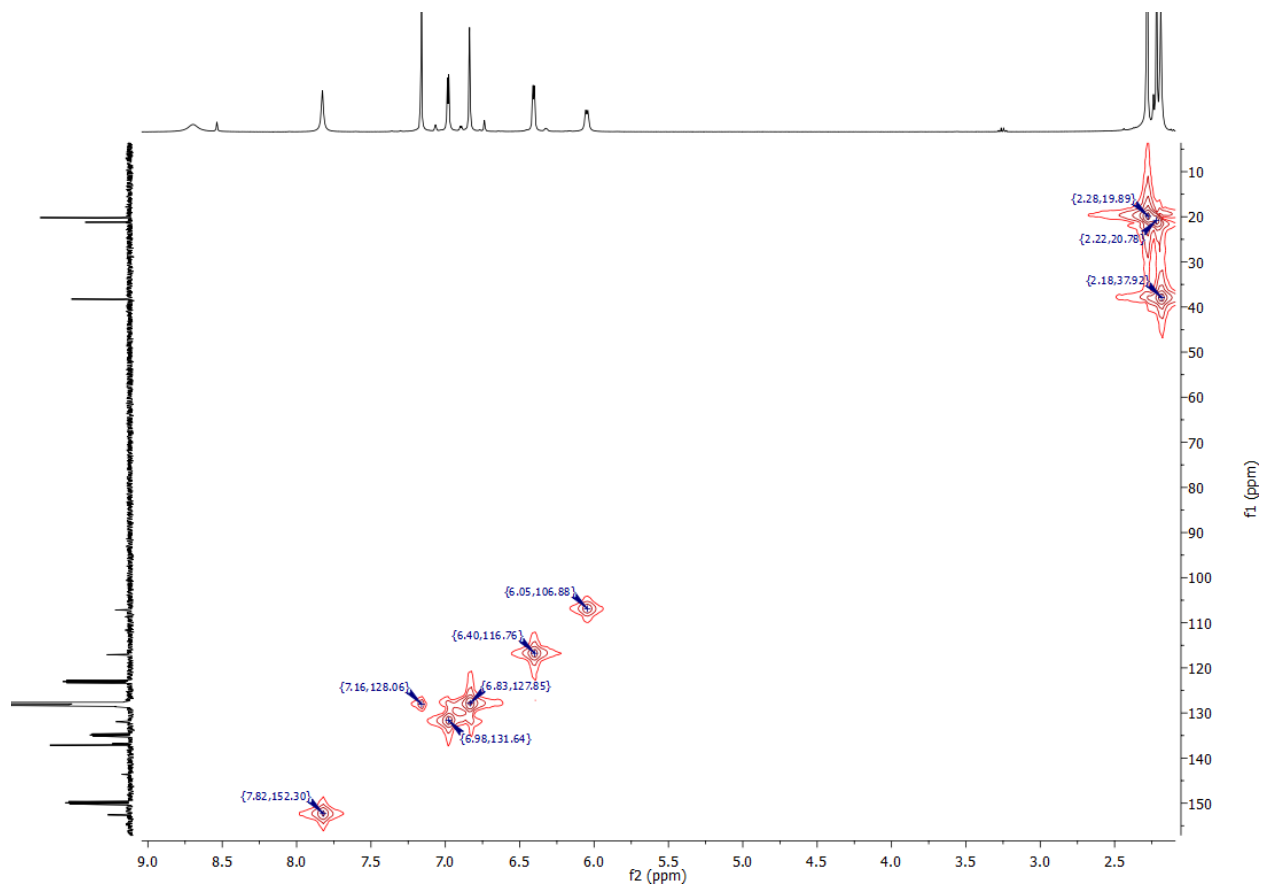

Figure S28. HMQCGP NMR spectrum of 4<sup>mes</sup>-DMAP in C<sub>6</sub>D<sub>6</sub>/py-d<sub>5</sub>.



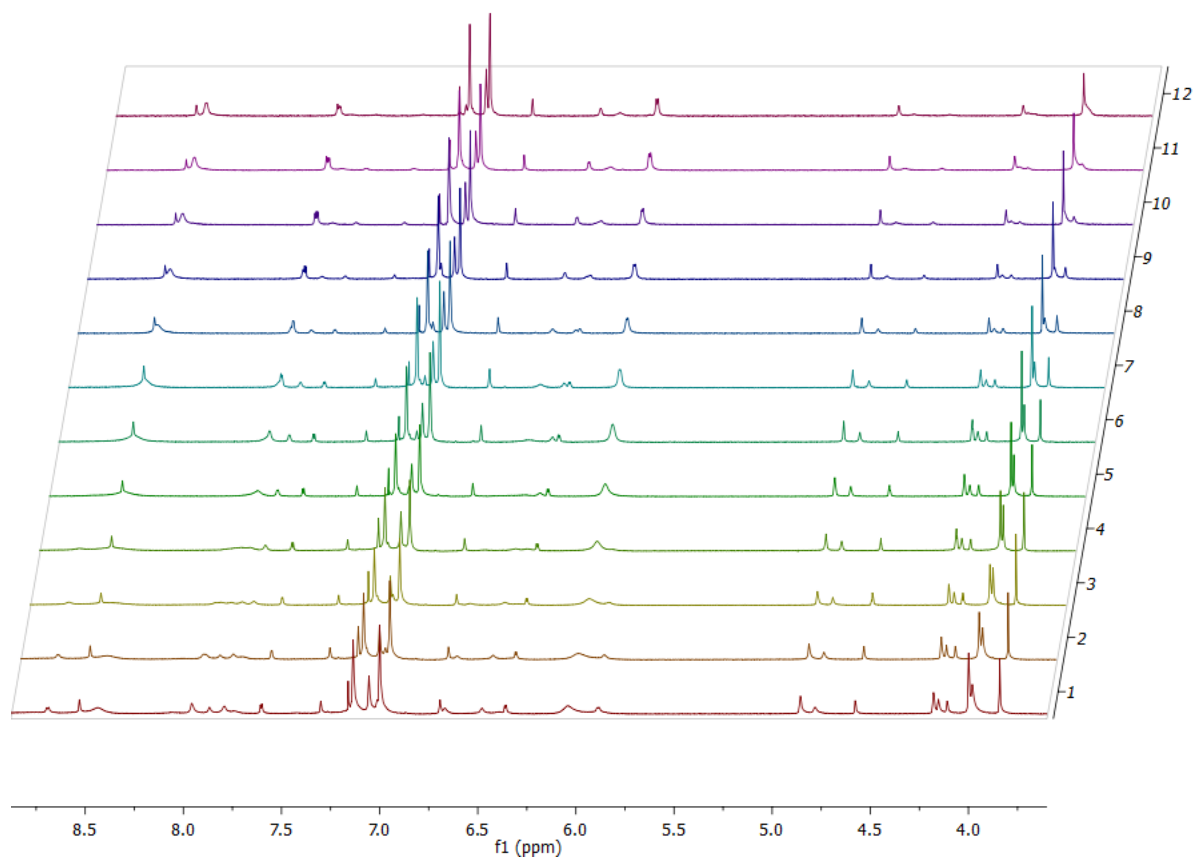

**Figure S29.** <sup>1</sup>H NMR spectral array of **4**<sup>Fc</sup>-DMAP in C<sub>7</sub>D<sub>8</sub>/py-*d*<sub>5</sub>. Spectrum 1 corresponds to -30 °C, and the subsequent numbers correspond to increasing temperatures in increments of 10 °C.

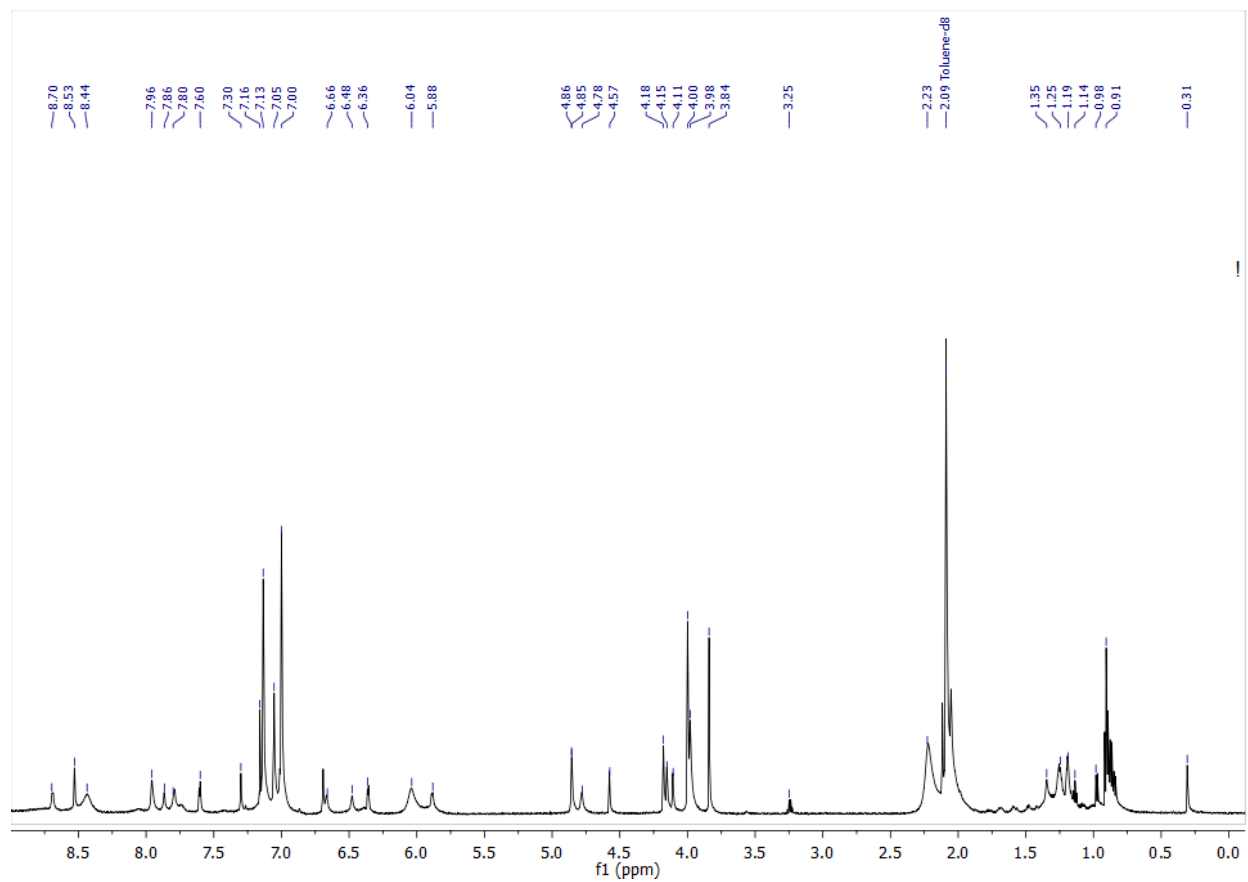

**Figure S30.** <sup>1</sup>H NMR spectrum of **4<sup>Fc</sup>**-DMAP in C<sub>7</sub>D<sub>8</sub>/py-*d*<sub>5</sub> at -30 °C.

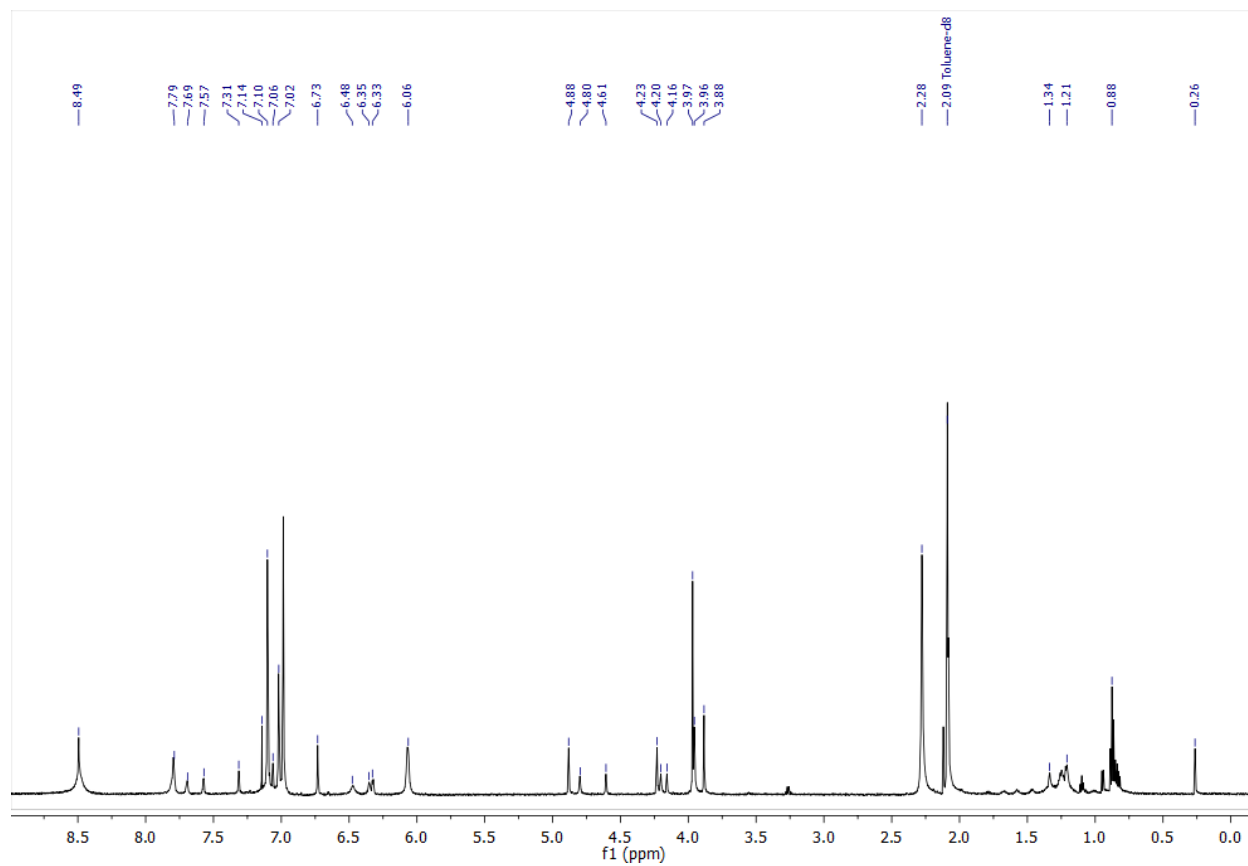

**Figure S31.**  $^1\text{H}$  NMR spectrum of  $4^{\text{Fc}}$ -DMAP in  $\text{C}_7\text{D}_8/\text{py}-d_5$  at  $30\text{ }^\circ\text{C}$ .

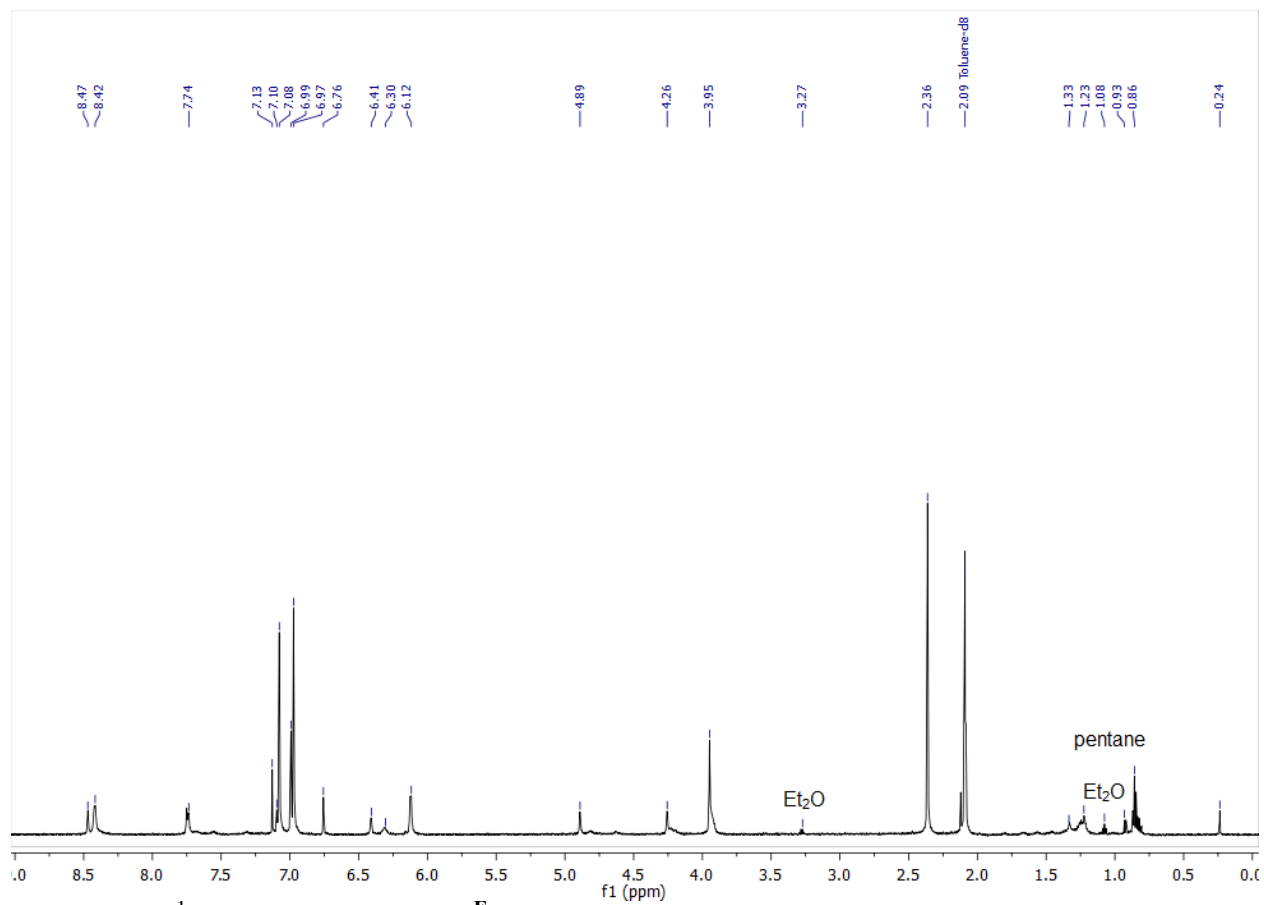

**Figure S32.**  $^1\text{H}$  NMR spectrum of  $4^{\text{Fc}}$ -DMAP in  $\text{C}_7\text{D}_8/\text{py}-d_5$  at  $80\text{ }^\circ\text{C}$ .

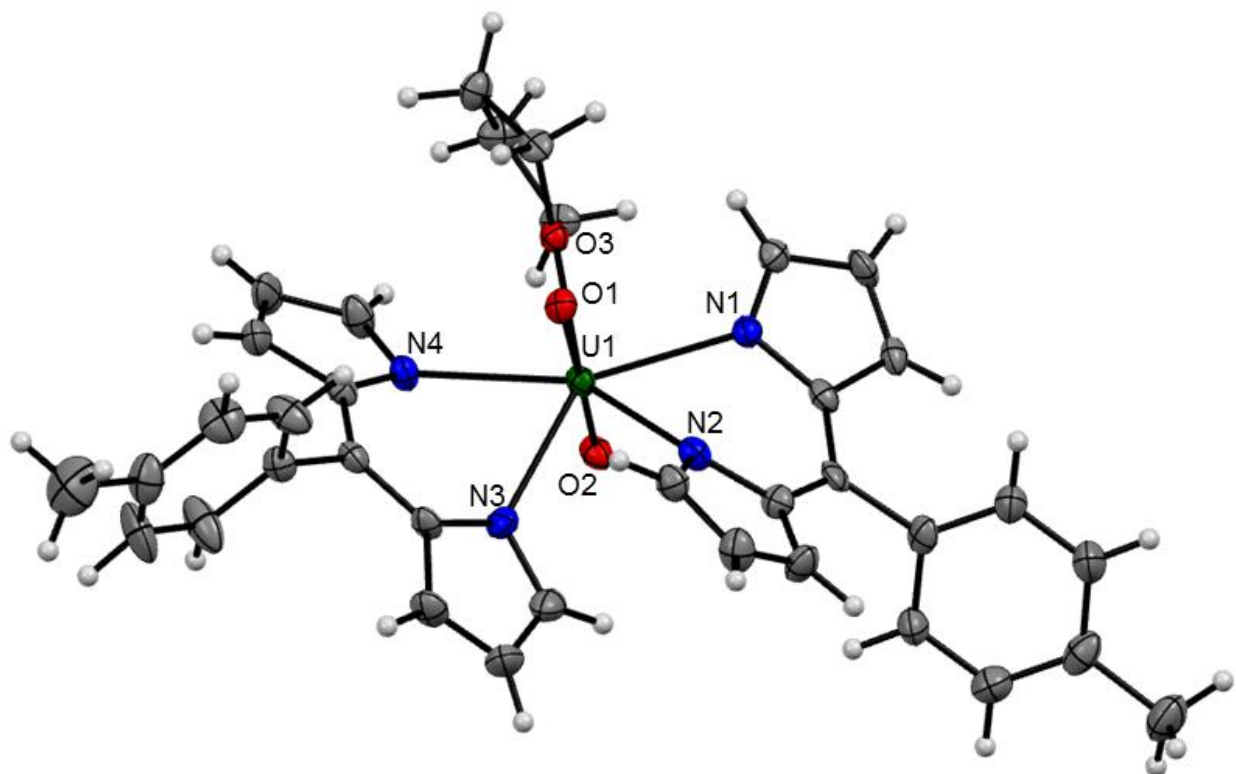

**Figure S33.** Solid-state molecular structure of  $4^{\text{tol}}\text{-THF}\cdot 3\text{THF}$  with 50% probability ellipsoids. Co-crystallized THF and second molecule of  $4^{\text{tol}}\text{-THF}$  omitted for clarity. Selected bond lengths ( $\text{\AA}$ ) and bond angles ( $^\circ$ ): U1-O1 = 1.765(5); U1-O2 = 1.768(5); U1-O3 = 2.445(5); U1-N1 = 2.464(6); U1-N2 = 2.532(6); U1-N3 = 2.482(6); U1-N4 = 2.546(6); O1-U1-O2 = 177.3(2); N2-N1-C1 = 163.9(5); N1-N2-C2 = 160.1(5); N4-N3-C3 = 161.8(5); C4-N4-N3 = 165.7(5); N4-U1-O1 = 84.4(2); O3-U1-O1 = 84.2(2); N1-U1-O1 = 99.2(2); N2-U1-O1 = 82.3(2); N3-U1-O1 = 97.0(2); N4-U1-O1 = 84.4(2). Dihedral angle of the planes between pyrrole 4 (containing N4) and pyrrole 3 (containing N3) =  $27.31^\circ$ . Dihedral angle of the planes between pyrrole 1 (containing N1) and pyrrole 2 (containing N2) =  $31.01^\circ$ .

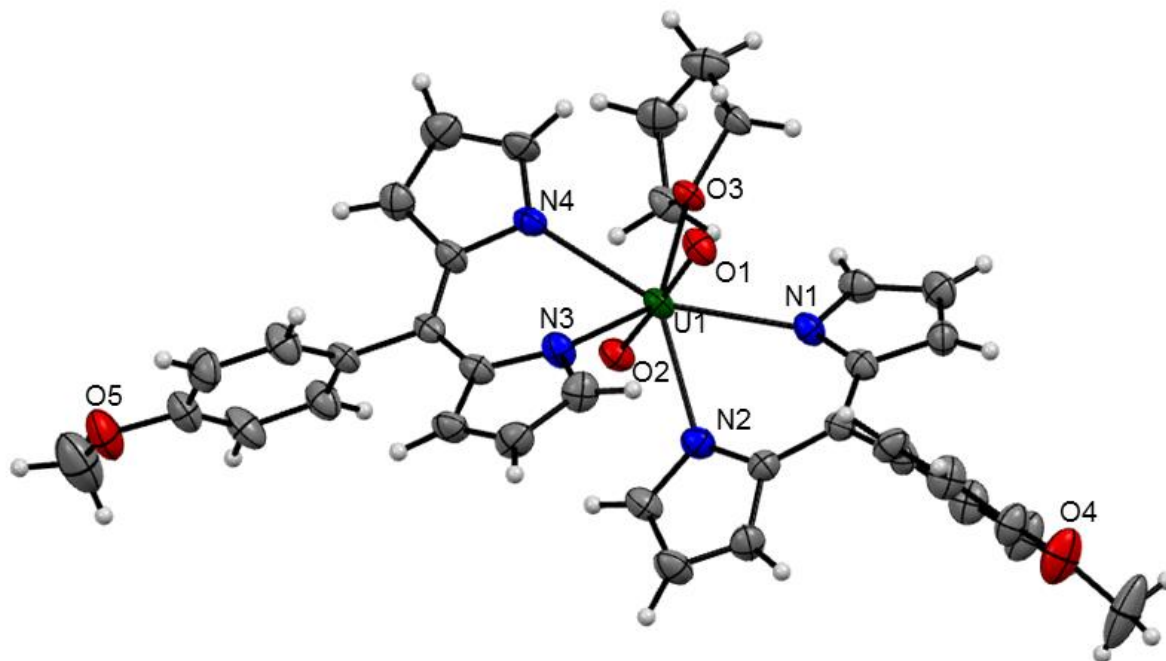

**Figure S34** Solid-state molecular structure of  $4^{\text{anis}}\text{-THF}\cdot\text{THF}\cdot\text{C}_5\text{H}_{12}$  with 50% probability ellipsoids. Co-crystallized solvent and second molecule of  $4^{\text{anis}}\text{-THF}$  omitted for clarity. Selected bond lengths ( $\text{\AA}$ ) and bond angles ( $^\circ$ ):  $\text{U1-O1} = 1.759(4)$ ;  $\text{U1-O2} = 1.764(4)$ ;  $\text{U1-O3} = 2.463(3)$ ;  $\text{U1-N1} = 2.546(5)$ ;  $\text{U1-N2} = 2.453(5)$ ;  $\text{U1-N3} = 2.479(5)$ ;  $\text{U1-N4} = 2.503(5)$ ;  $\text{O1-U1-O2} = 176.8(2)$ ;  $\text{N2-N1-C2} = 164.7(4)$ ;  $\text{N1-N2-C1} = 160.0(4)$ ;  $\text{N4-N3-C3} = 161.7(4)$ ;  $\text{C4-N4-N3} = 163.6(4)$ ;  $\text{N4-U1-O1} = 84.2(2)$ ;  $\text{O3-U1-O1} = 83.9(2)$ ;  $\text{N1-U1-O1} = 98.9(2)$ ;  $\text{N2-U1-O1} = 82.0(2)$ ;  $\text{N3-U1-O1} = 97.6(2)$ ;  $\text{N4-U1-O1} = 84.2(2)$ . Dihedral angle of the planes between pyrrole 4 (containing N4) and pyrrole 3 (containing N3) =  $29.58^\circ$ . Dihedral angle of the planes between pyrrole 1 (containing N1) and pyrrole 2 (containing N2) =  $29.58^\circ$ .

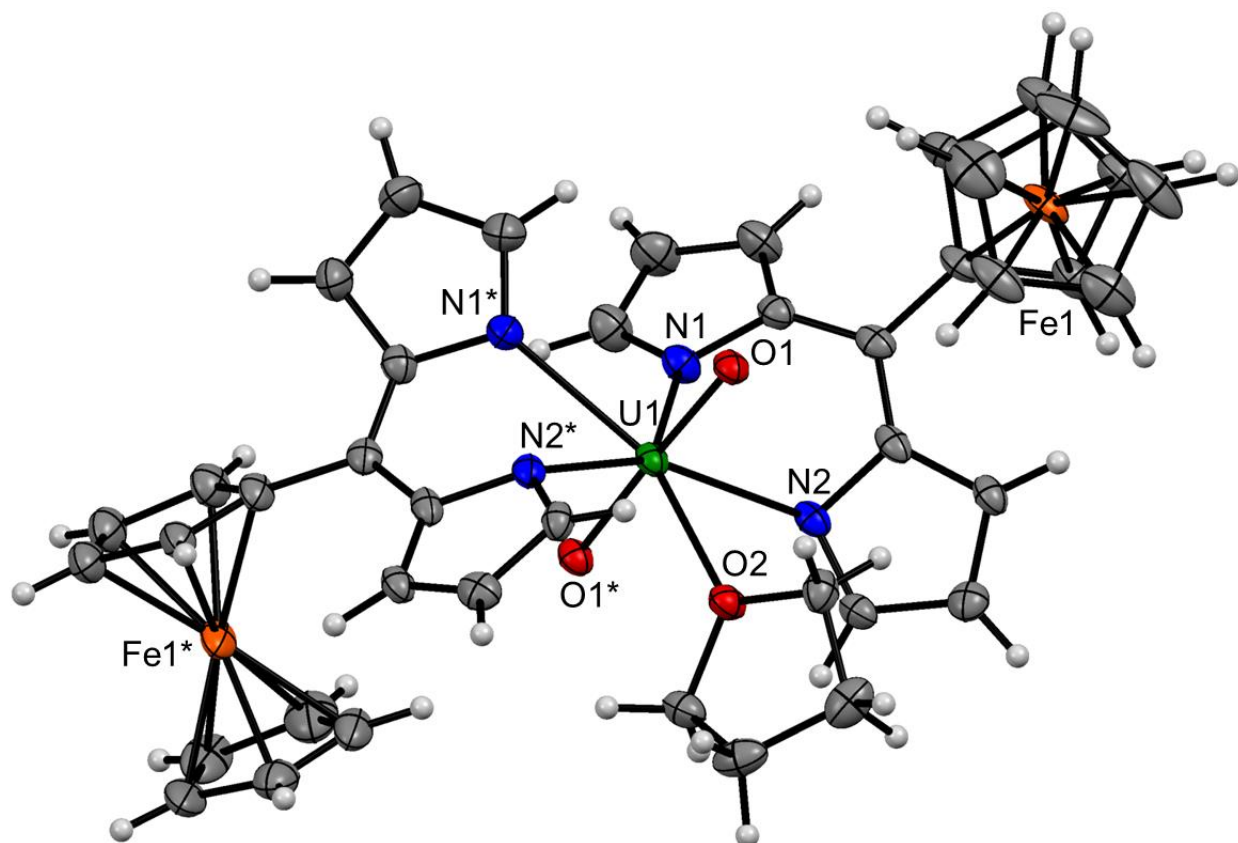

**Figure S35.** Solid-state molecular structure of  $4^{\text{Fc}}\text{-THF}\cdot\text{C}_5\text{H}_{12}$  with 50% probability ellipsoids. Co-crystallized solvent molecule omitted for clarity. Selected bond lengths ( $\text{\AA}$ ) and bond angles ( $^\circ$ ): U1-O1 = 1.773(3); U1-O3 = 2.489(5); U1-N1 = 2.457(4); U1-N2 = 2.482(4); O1-U1-O2 = 177.0; N2-N1-C1 = 150.3(4); N1-N2-C2 = 165.5(4); O3-U1-O1 = 89.1; N1-U1-O1 = 91.3; N2-U1-O1 = 89.1; Dihedral angle of the planes between pyrrole 1 (containing N1) and pyrrole 2 (containing N2) = 37.72 $^\circ$ .

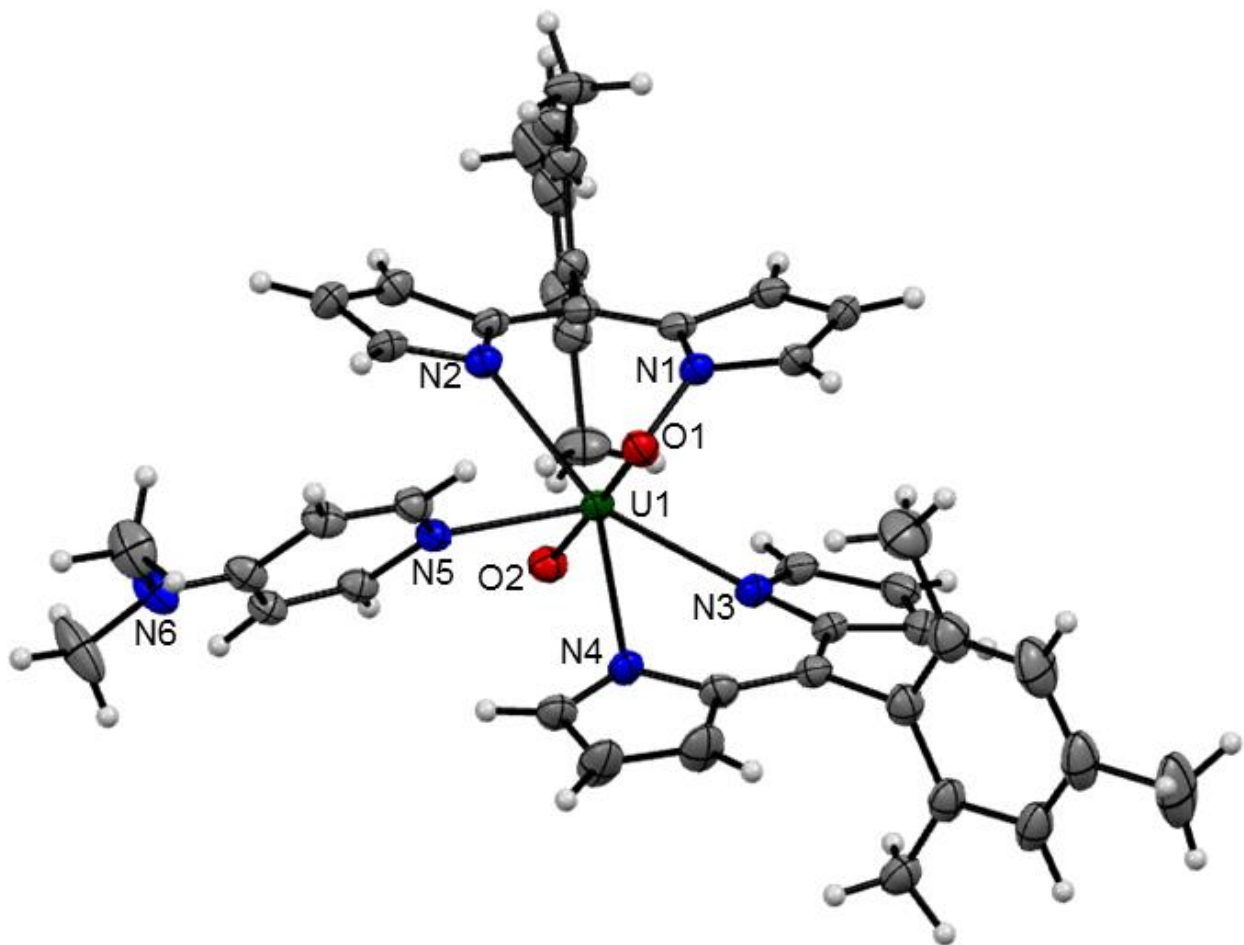

**Figure S36.** Solid-state molecular structure of  $4^{\text{mes}}$ -DMAP·THF·0.5C<sub>5</sub>H<sub>12</sub> with 50% probability ellipsoids. Co-crystallized solvent omitted for clarity. Selected bond lengths (Å) and bond angles (°): U1-O1 = 1.776(4); U1-O2 = 1.764(4); U1-N5 = 2.489(5); U1-N1 = 2.554(4); U1-N2 = 2.472(5); U1-N3 = 2.556(4); U1-N4 = 2.468(4); O1-U1-O2 = 176.9(2); N2-N1-C1 = 169.2(4); N1-N2-C2 = 164.3(4); N4-N3-C3 = 167.5(4); C4-N4-N3 = 164.8(4); N4-U1-O1 = 100.1(2); N5-U1-O1 = 89.1(2); N1-U1-O1 = 96.4(2); N2-U1-O1 = 82.6(2); N3-U1-O1 = 82.2(2). Dihedral angle of the planes between pyrrole 4 (containing N4) and pyrrole 3 (containing N3) = 22.34°. Dihedral angle of the planes between pyrrole 1 (containing N1) and pyrrole 2 (containing N2) = 20.41°.



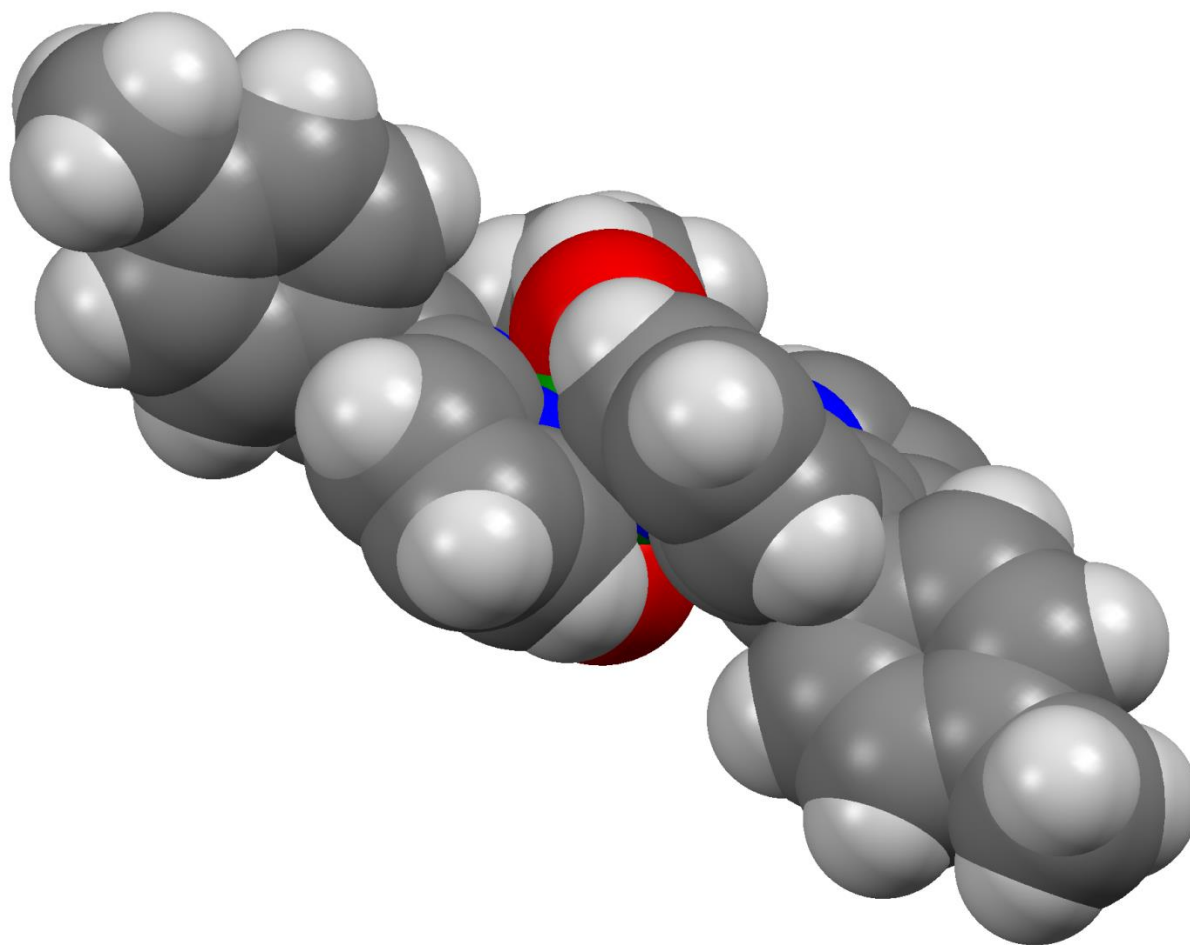

**Figure S37.** Side view of the solid-state molecular structure of  $4^{\text{tol}}\text{-THF}\cdot 3\text{THF}$  with space filling atoms. Green atom is uranium, red atoms are oxygen, blue atoms are nitrogen, grey atoms are carbon, and hydrogen atoms are white.

**Table S1.** X-ray crystallographic data for **4<sup>tolyl</sup>**-THF·3THF, **4<sup>anis</sup>**-THF·THF·C<sub>5</sub>H<sub>12</sub>, **4<sup>Fc</sup>**-THF·C<sub>5</sub>H<sub>12</sub>, and **4<sup>mes</sup>**-DMAP·THF·0.5C<sub>5</sub>H<sub>12</sub>.

|                                                                  | <b>4<sup>tolyl</sup></b> -THF·3THF                                                                                          | <b>4<sup>anis</sup></b> -THF·THF·C <sub>5</sub> H <sub>12</sub>                                                                                     | <b>4<sup>mes</sup></b> -DMAP·THF<br>·0.5 C <sub>5</sub> H <sub>12</sub>                                                                              | <b>4<sup>Fc</sup></b> -THF·C <sub>5</sub> H <sub>12</sub>                                          |
|------------------------------------------------------------------|-----------------------------------------------------------------------------------------------------------------------------|-----------------------------------------------------------------------------------------------------------------------------------------------------|------------------------------------------------------------------------------------------------------------------------------------------------------|----------------------------------------------------------------------------------------------------|
| Empirical formula                                                | U <sub>2</sub> C <sub>72</sub> H <sub>68</sub> N <sub>4</sub> O <sub>6</sub> (C <sub>4</sub> H <sub>8</sub> O) <sub>3</sub> | U <sub>2</sub> C <sub>72</sub> H <sub>68</sub> N <sub>4</sub> O <sub>8</sub> (C <sub>4</sub> H <sub>8</sub> O)<br>(C <sub>5</sub> H <sub>12</sub> ) | UC <sub>43</sub> H <sub>44</sub> N <sub>6</sub> O <sub>2</sub> (C <sub>4</sub> H <sub>8</sub> O)<br>(C <sub>5</sub> H <sub>12</sub> ) <sub>0.5</sub> | UC <sub>21</sub> H <sub>19</sub> N <sub>2</sub> O <sub>2</sub> Fe(C <sub>5</sub> H <sub>12</sub> ) |
| Crystal Habit, color                                             | Block, red-orange                                                                                                           | Plate, red-orange                                                                                                                                   | Plate, red                                                                                                                                           | Plate, dark red                                                                                    |
| Crystal size (mm)                                                | 0.18 × 0.10 × 0.05                                                                                                          | 0.41 × 0.33 × 0.06                                                                                                                                  | 0.96 × 0.63 × 0.19                                                                                                                                   | 0.72 × 0.15 × 0.01                                                                                 |
| Crystal system                                                   | Triclinic                                                                                                                   | Triclinic                                                                                                                                           | monoclinic                                                                                                                                           | trigonal                                                                                           |
| Space group                                                      | P-1                                                                                                                         | P-1                                                                                                                                                 | P2 <sub>1</sub> /c                                                                                                                                   | P-3c1                                                                                              |
| Volume (Å <sup>3</sup> )                                         | 3618.4(2)                                                                                                                   | 3750.1(3)                                                                                                                                           | 4625.7(5)                                                                                                                                            | 6141.2(5)                                                                                          |
| a (Å)                                                            | 14.4946(5)                                                                                                                  | 14.5004(7)                                                                                                                                          | 9.3522(6)                                                                                                                                            | 20.5164(8)                                                                                         |
| b (Å)                                                            | 15.8228(5)                                                                                                                  | 16.3863(8)                                                                                                                                          | 26.9204(16)                                                                                                                                          | 20.5164(8)                                                                                         |
| c (Å)                                                            | 16.5676(5)                                                                                                                  | 16.7499(9)                                                                                                                                          | 18.8537(11)                                                                                                                                          | 16.8469(7)                                                                                         |
| α(°)                                                             | 98.7660(10) °                                                                                                               | 99.0510(10)°                                                                                                                                        | 90°                                                                                                                                                  | 90°                                                                                                |
| β(°)                                                             | 102.5540(10) °                                                                                                              | 103.8570(10)°                                                                                                                                       | 102.9630(10)°                                                                                                                                        | 90°                                                                                                |
| γ(°)                                                             | 96.9580(10) °                                                                                                               | 98.0330(10)°                                                                                                                                        | 90°                                                                                                                                                  | 120°                                                                                               |
| Z                                                                | 2                                                                                                                           | 2                                                                                                                                                   | 4                                                                                                                                                    | 1                                                                                                  |
| Formula weight<br>(g/mol)                                        | 1705.57                                                                                                                     | 1923.66                                                                                                                                             | 1116.23                                                                                                                                              | 5942.79                                                                                            |
| Density (calculated)<br>(Mg/m <sup>3</sup> )                     | 1.565                                                                                                                       | 1.704                                                                                                                                               | 1.603                                                                                                                                                | 1.607                                                                                              |
| Absorption coefficient<br>(mm <sup>-1</sup> )                    | 4.528                                                                                                                       | 4.384                                                                                                                                               | 3.563                                                                                                                                                | 4.685                                                                                              |
| F <sub>000</sub>                                                 | 1680.0                                                                                                                      | 1892.0                                                                                                                                              | 2268.0                                                                                                                                               | 2888.0                                                                                             |
| Total no. reflections                                            | 39775                                                                                                                       | 41352                                                                                                                                               | 56102                                                                                                                                                | 64170                                                                                              |
| Unique reflections                                               | 16322                                                                                                                       | 17045                                                                                                                                               | 13066                                                                                                                                                | 4714                                                                                               |
| Final R indices [ <i>I</i> ><br>2σ( <i>I</i> )]                  | R <sub>1</sub> = 0.0456, wR <sub>2</sub> =                                                                                  | R <sub>1</sub> = 0.0404, wR <sub>2</sub> =                                                                                                          | R <sub>1</sub> = 0.0538, wR <sub>2</sub> =                                                                                                           | R <sub>1</sub> = 0.0330, wR <sub>2</sub> =                                                         |
| Largest diff. peak and<br>hole (e <sup>-</sup> Å <sup>-3</sup> ) | 2.36 and -1.19                                                                                                              | 2.23 and -0.76                                                                                                                                      | 2.65 and -5.48                                                                                                                                       | 2.97 and -0.82                                                                                     |
| GOF                                                              | 1.045                                                                                                                       | 1.050                                                                                                                                               | 1.258                                                                                                                                                | 1.142                                                                                              |

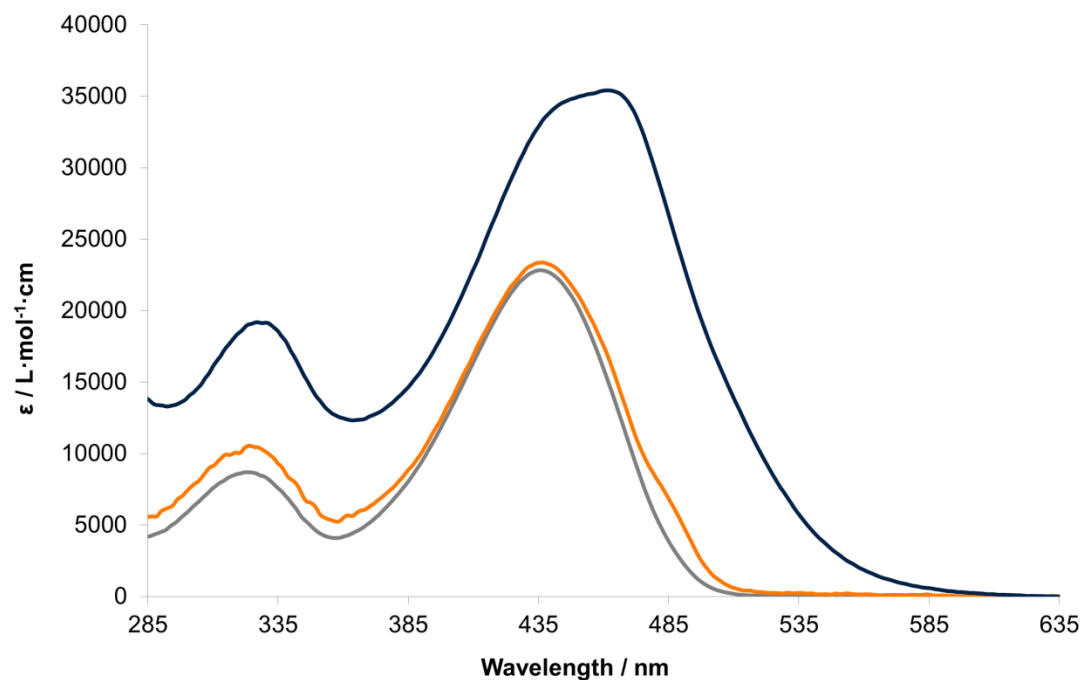

**Figure S38.** Room temperature UV/vis absorption spectra for  $2^{\text{tol}}$  (benzene, 24.49  $\mu\text{M}$ ) (grey),  $3^{\text{tol}}$  (benzene, 10.46  $\mu\text{M}$ ) (orange), and  $4^{\text{tol}}$ -DMAP (benzene, 11.8  $\mu\text{M}$ ) (black).

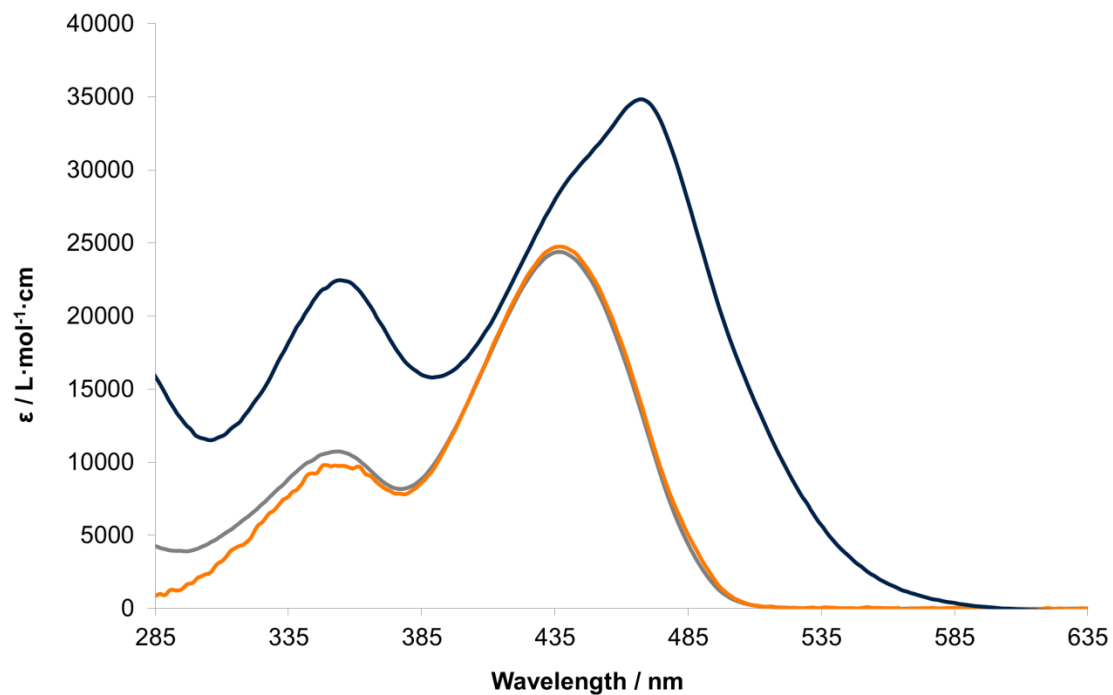

**Figure S39.** Room temperature UV/vis absorption spectra for **2<sup>anis</sup>** (benzene, 24.58  $\mu\text{M}$ ) (grey), **3<sup>anis</sup>** (benzene, 9.68  $\mu\text{M}$ ) (orange), and **4<sup>anis</sup>-DMAP** (benzene, 11.76  $\mu\text{M}$ ) (black).

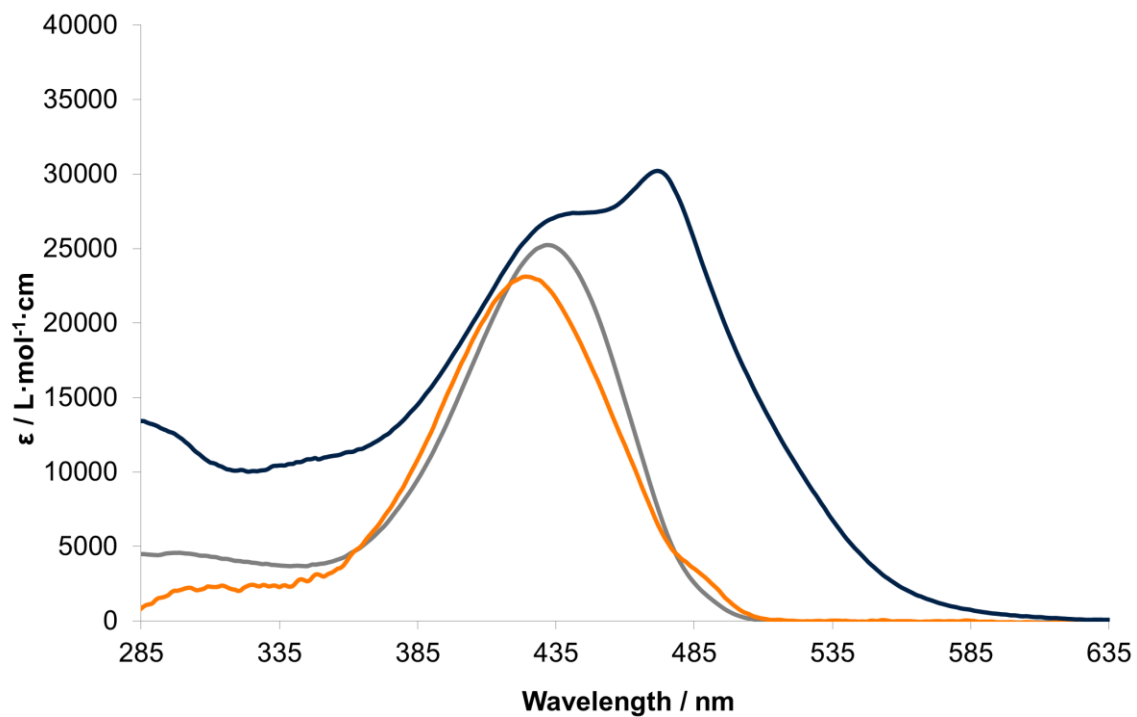

**Figure S40.** Room temperature UV/vis absorption spectra for  $2^{\text{mes}}$  (benzene, 25.09  $\mu\text{M}$ ) (grey),  $3^{\text{mes}}$  (benzene, 9.66  $\mu\text{M}$ ) (orange), and  $4^{\text{mes}}$ -DMAP (benzene, 12.9  $\mu\text{M}$ ) (black).

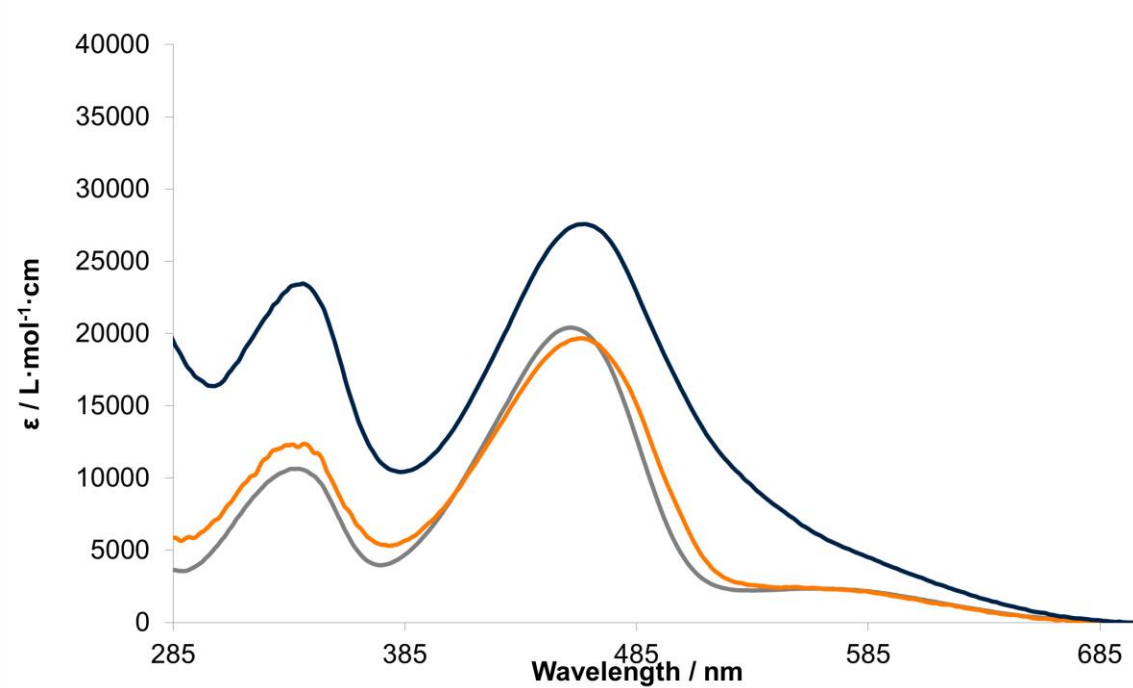

**Figure S41.** Room temperature UV/vis absorption spectra for  $2^{\text{Fc}}$  (benzene, 27.98  $\mu\text{M}$ ) (grey),  $3^{\text{Fc}}$  (benzene, 10.67  $\mu\text{M}$ ) (orange), and  $4^{\text{Fc}}$ -DMAP (benzene, 10.59  $\mu\text{M}$ ) (black).

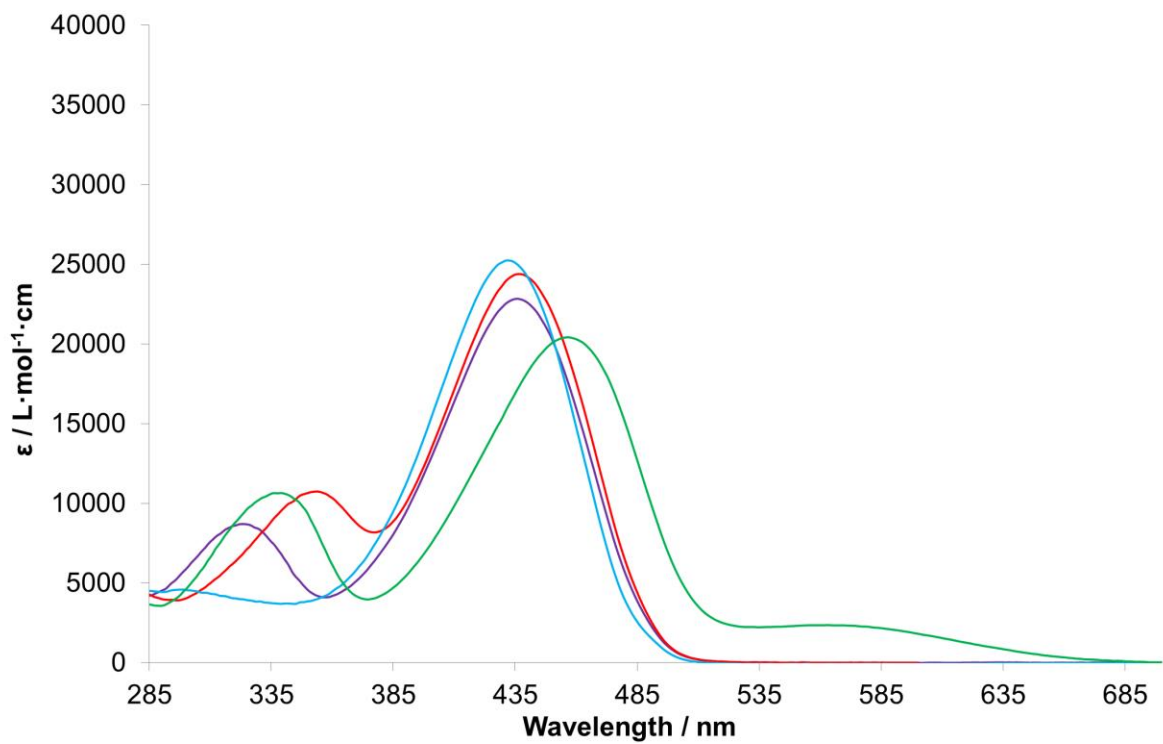

**Figure S42.** Room temperature UV/vis absorption spectra for protonated dipyrins **2<sup>tol</sup>** (purple), **2<sup>anis</sup>** (red), **2<sup>mes</sup>** (blue), and **2<sup>Fc</sup>** (green).

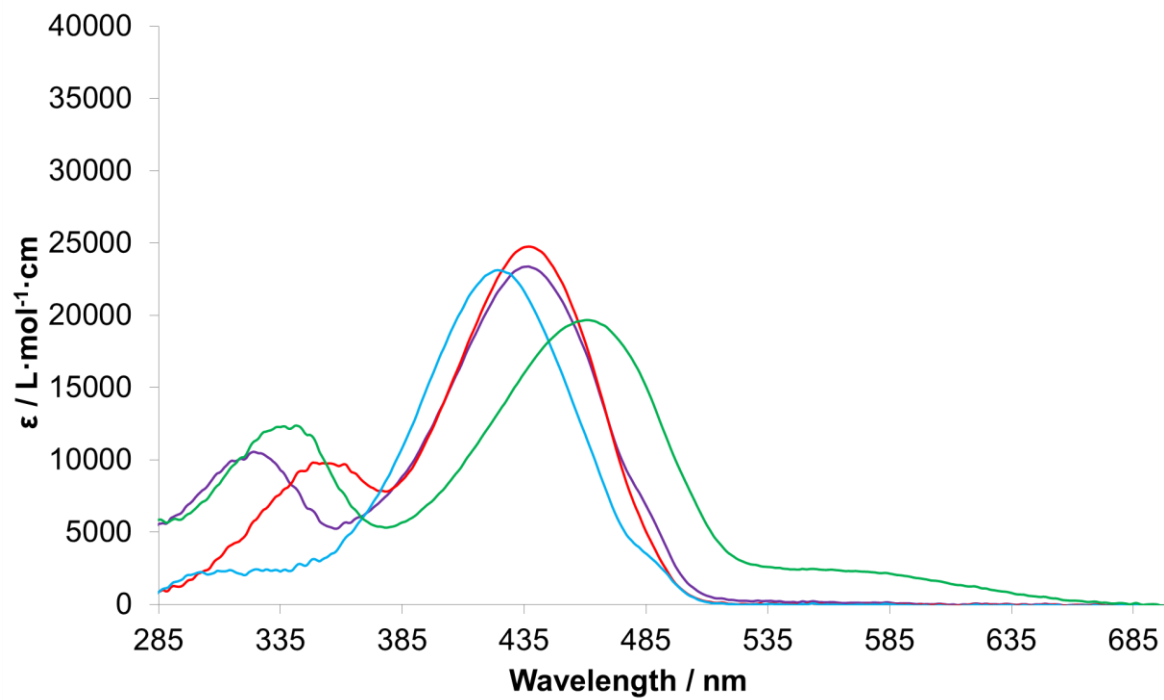

**Figure S43.** Room temperature UV/vis absorption spectra for sodium dipyrins **3<sup>tol</sup>** (purple), **3<sup>anis</sup>** (red), **3<sup>mes</sup>** (blue), and **3<sup>Fc</sup>** (green).



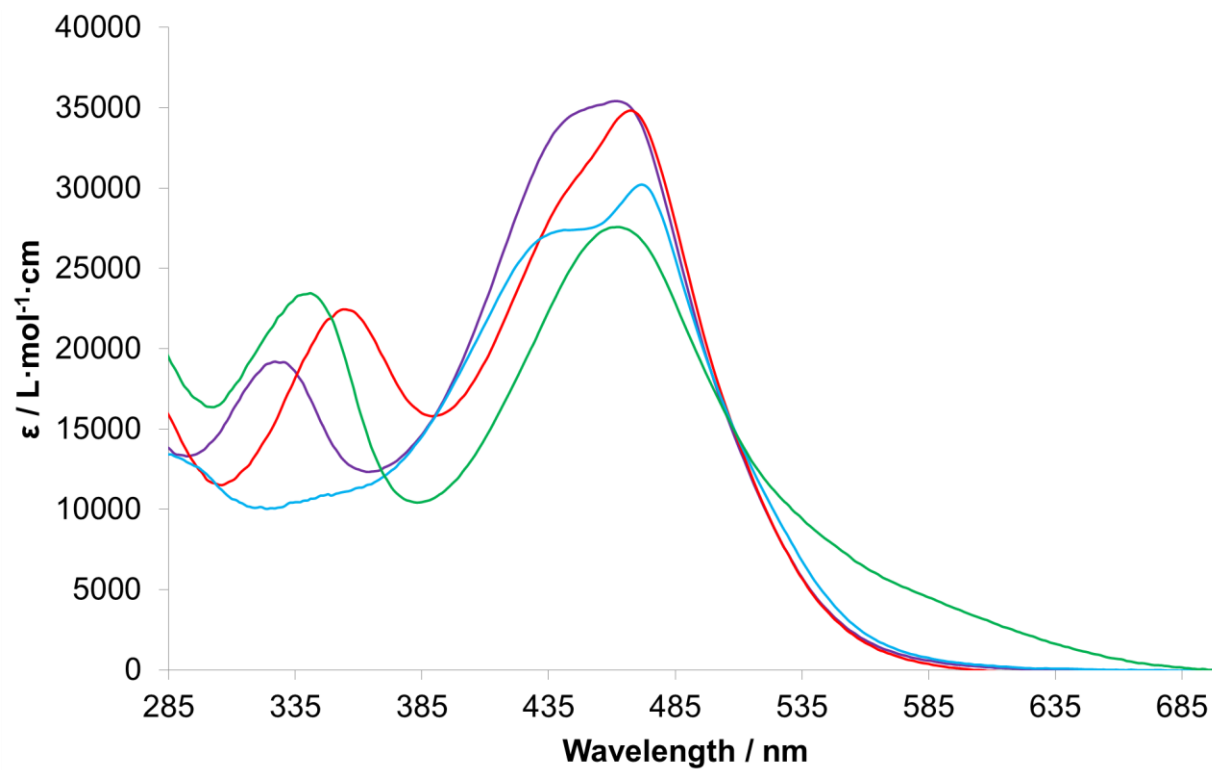

**Figure S44.** Room temperature UV/vis absorption spectra for uranyl dipyrins **4<sup>tol</sup>-DMAP** (purple), **4<sup>anis</sup>-DMAP** (red), **4<sup>mes</sup>-DMAP** (blue), and **4<sup>Fc</sup>-DMAP** (green).

**Table S2.** UV/vis absorption data.

| <b>Compound</b>              | <b>Concentration (<math>\mu\text{M}</math>)</b> | <b><math>\lambda_{\text{max}}</math> (nm)</b> | <b><math>\epsilon</math> (<math>\text{L}\cdot\text{mol}^{-1}\cdot\text{cm}</math>)</b> |
|------------------------------|-------------------------------------------------|-----------------------------------------------|----------------------------------------------------------------------------------------|
| <b>2<sup>tol</sup></b>       | 24.49                                           | 436                                           | 22832                                                                                  |
| <b>2<sup>anis</sup></b>      | 24.58                                           | 437                                           | 24385                                                                                  |
| <b>2<sup>mes</sup></b>       | 25.09                                           | 453                                           | 18959                                                                                  |
| <b>2<sup>Fc</sup></b>        | 27.98                                           | 456                                           | 20412                                                                                  |
| <b>3<sup>tol</sup></b>       | 10.46                                           | 436                                           | 23365                                                                                  |
| <b>3<sup>anis</sup></b>      | 9.68                                            | 437                                           | 24755                                                                                  |
| <b>3<sup>mes</sup></b>       | 9.66                                            | 432                                           | 22375                                                                                  |
| <b>3<sup>Fc</sup></b>        | 10.67                                           | 453                                           | 20185                                                                                  |
| <b>4<sup>tol</sup>-DMAP</b>  | 11.8                                            | 462                                           | 35416                                                                                  |
| <b>4<sup>anis</sup>-DMAP</b> | 11.76                                           | 467                                           | 34826                                                                                  |
| <b>4<sup>mes</sup>-DMAP</b>  | 12.9                                            | 472                                           | 30214                                                                                  |
| <b>4<sup>Fc</sup>-DMAP</b>   | 10.59                                           | 462                                           | 27578                                                                                  |

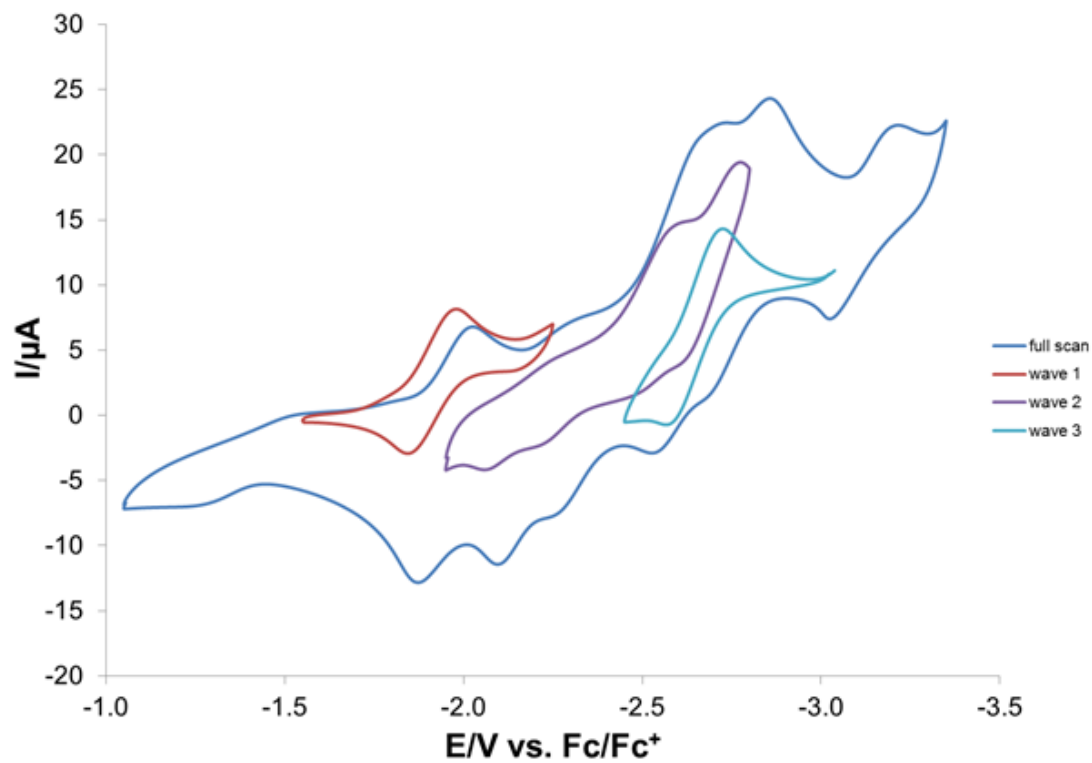

**Figure S45.** Room temperature cyclic voltammogram of  $4^{\text{tol}}$ -DMAP in THF (vs internally referenced  $\text{Cp}_2\text{Fe}/\text{Cp}_2\text{Fe}^+$  at  $E_{1/2} = 0$  V). (0.1M  $[\text{NBu}_4][\text{PF}_6]$  as supporting electrolyte). The scan rate is 250 mV/s.

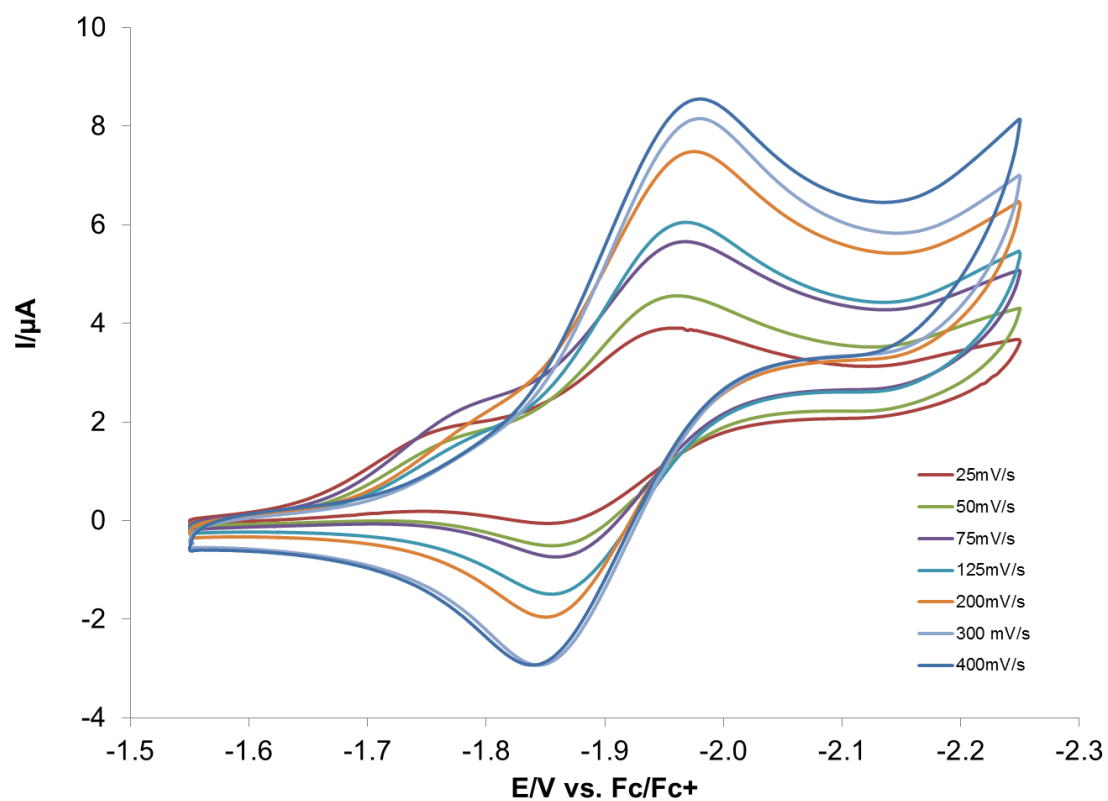

**Figure S46.** Room temperature cyclic voltammogram of wave 1 of  $4^{\text{tol}}$ -DMAP in THF (vs internally referenced  $\text{Cp}_2\text{Fe}/\text{Cp}_2\text{Fe}^+$  at  $E_{1/2} = 0$  V). (0.1M  $[\text{NBu}_4][\text{PF}_6]$  as supporting electrolyte).

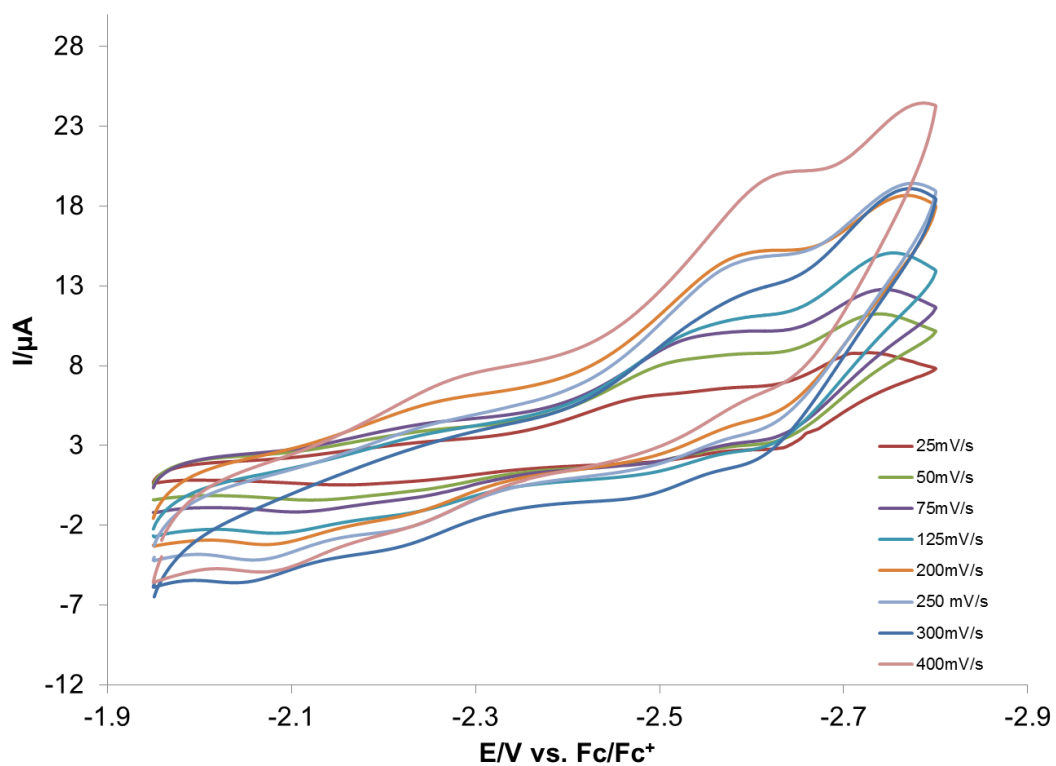

**Figure S47.** Room temperature cyclic voltammogram of wave 2 of  $4^{\text{tol}}$ -DMAP in THF (vs internally referenced  $\text{Cp}_2\text{Fe}/\text{Cp}_2\text{Fe}^+$  at  $E_{1/2} = 0$  V). (0.1M  $[\text{NBu}_4][\text{PF}_6]$  as supporting electrolyte).

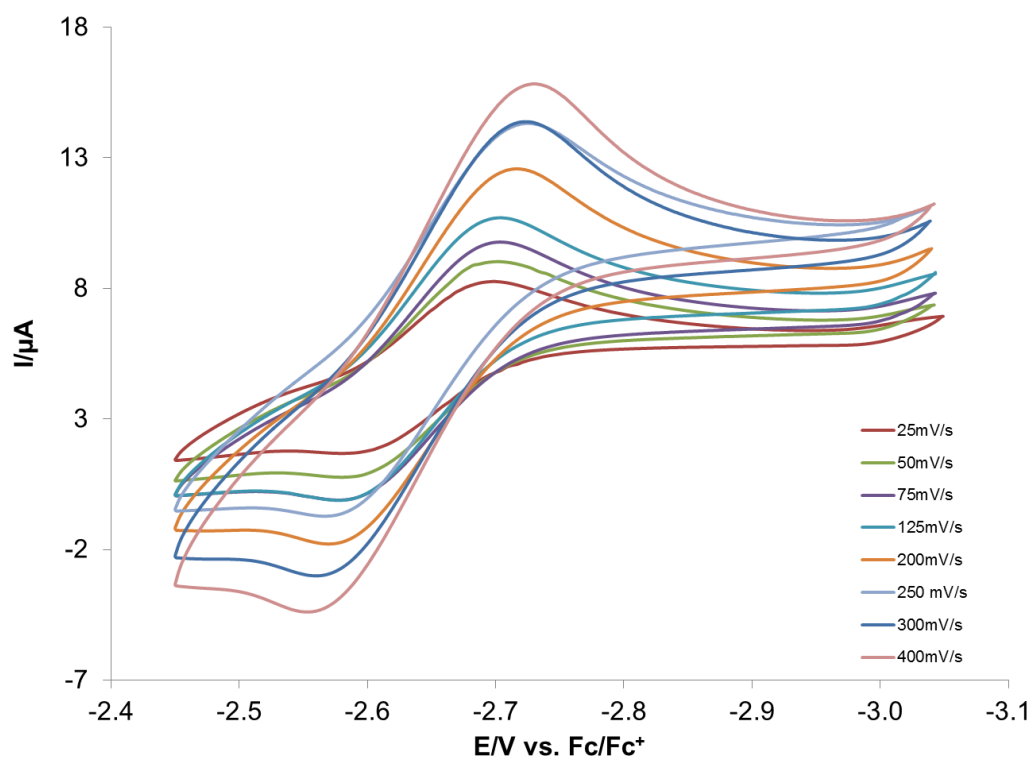

**Figure S48.** Room temperature cyclic voltammogram of wave 3 of  $4^{\text{tol}}$ -DMAP in THF (vs internally referenced  $\text{Cp}_2\text{Fe}/\text{Cp}_2\text{Fe}^+$  at  $E_{1/2} = 0$  V). (0.1M  $[\text{NBu}_4][\text{PF}_6]$  as supporting electrolyte).

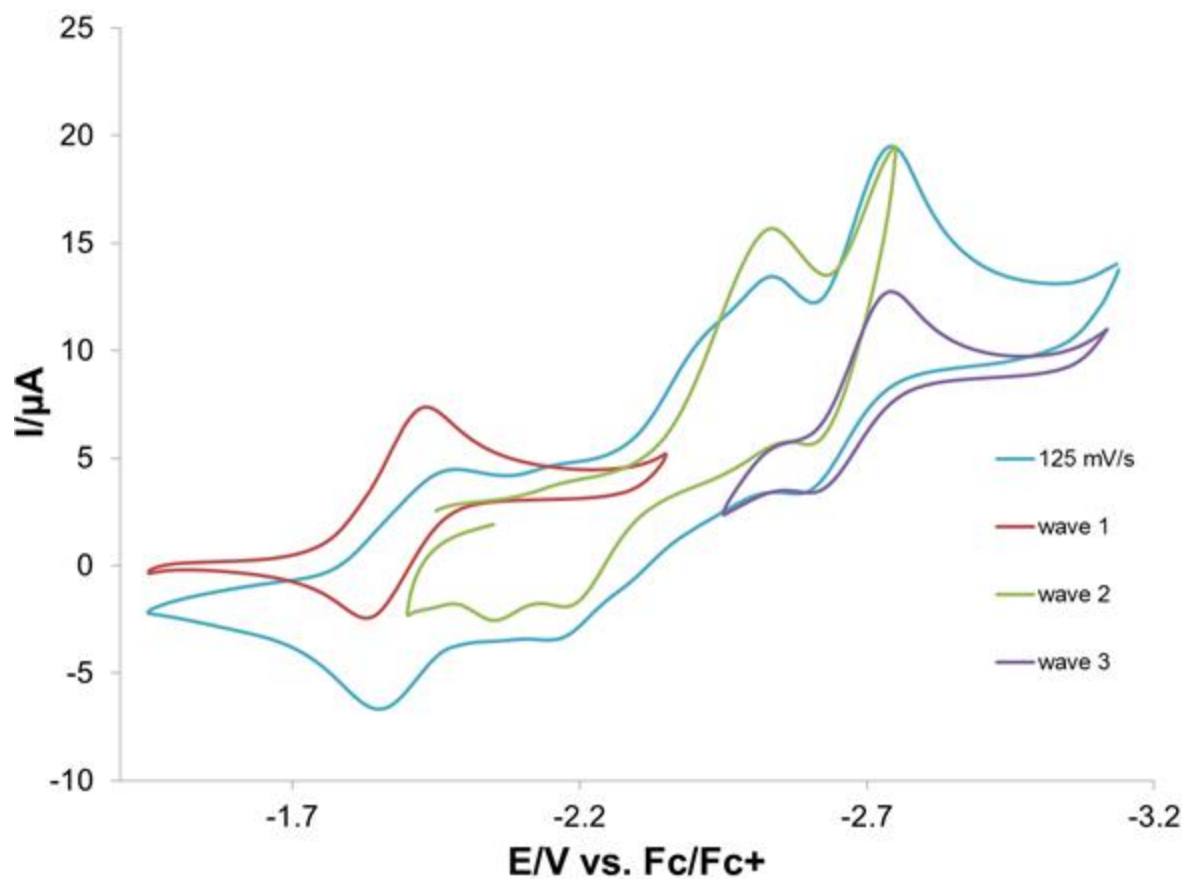

**Figure S49.** Room temperature cyclic voltammogram of **4<sup>anis</sup>**-DMAP in THF (vs internally referenced Cp<sub>2</sub>Fe/Cp<sub>2</sub>Fe<sup>+</sup> at E<sub>1/2</sub> = 0 V). (0.1M [NBu<sub>4</sub>][PF<sub>6</sub>] as supporting electrolyte). The scan rate is 125 mV/s.

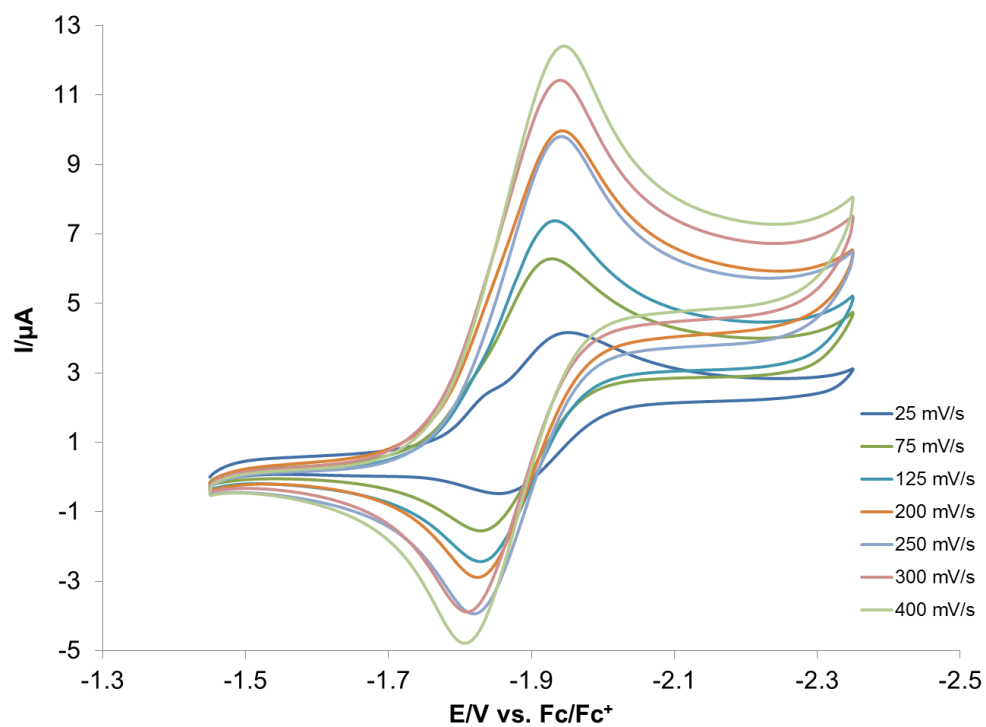

**Figure S50.** Room temperature cyclic voltammogram of wave 1 of 4<sup>anis</sup>-DMAP in THF (vs internally referenced Cp<sub>2</sub>Fe/Cp<sub>2</sub>Fe<sup>+</sup> at E<sub>1/2</sub> = 0 V). (0.1M [NBu<sub>4</sub>][PF<sub>6</sub>] as supporting electrolyte).



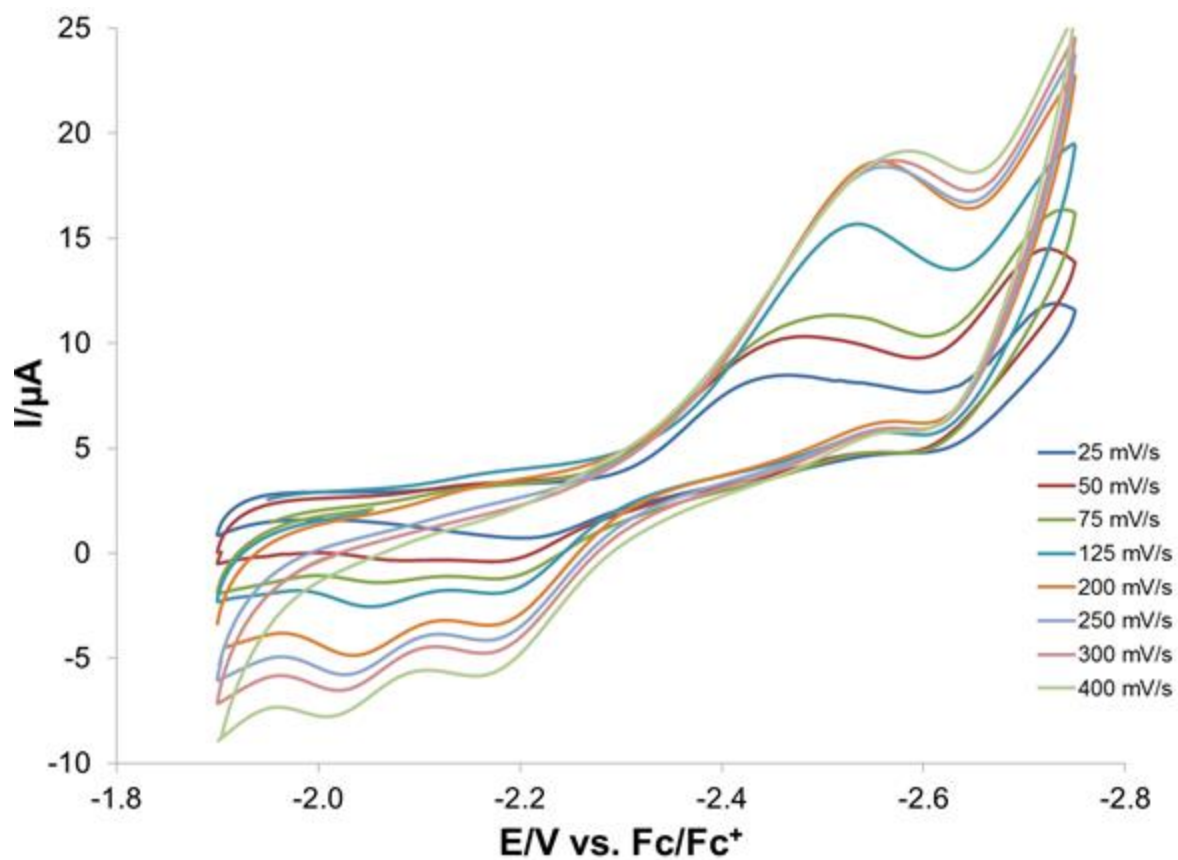

**Figure S51.** Room temperature cyclic voltammogram of wave 2 of **4<sup>anis</sup>-DMAP** in THF (vs internally referenced Cp<sub>2</sub>Fe/Cp<sub>2</sub>Fe<sup>+</sup> at E<sub>1/2</sub> = 0 V). (0.1M [NBu<sub>4</sub>][PF<sub>6</sub>] as supporting electrolyte).

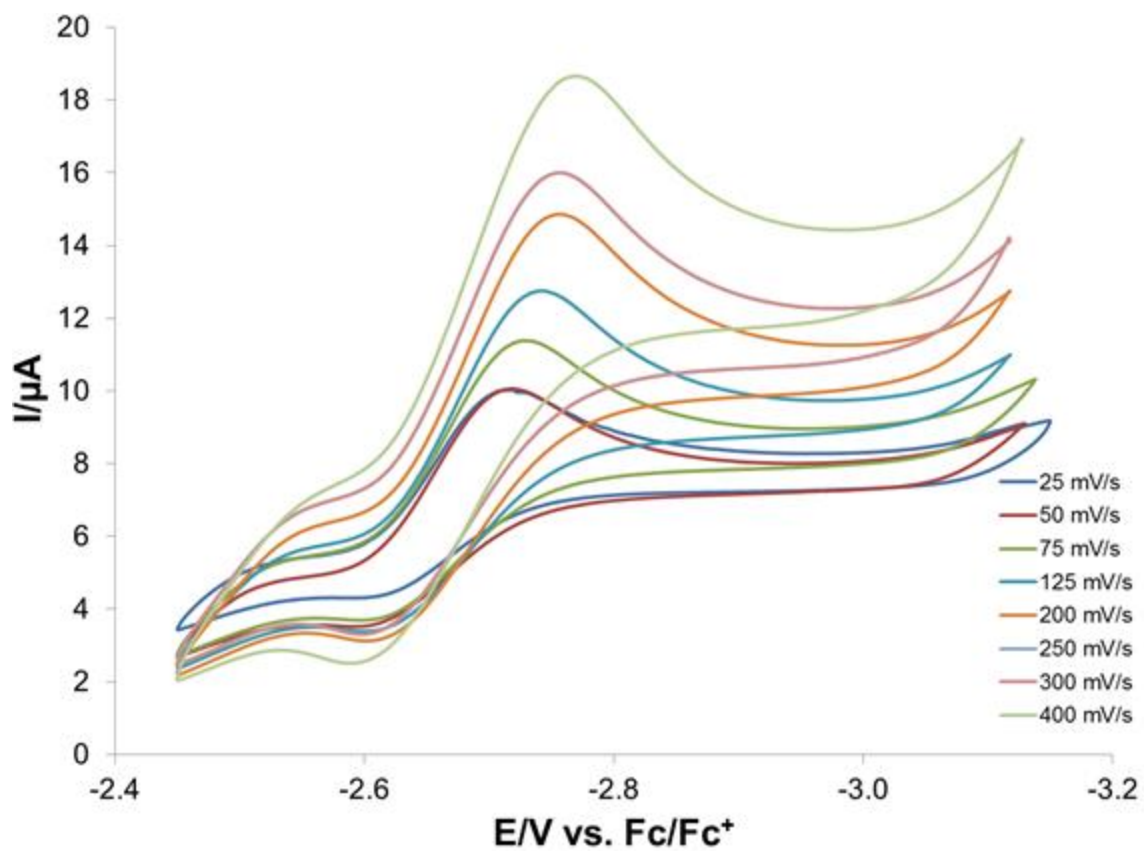

**Figure S52.** Room temperature cyclic voltammogram of wave 3 of 4<sup>anis</sup>-DMAP in THF (vs internally referenced  $\text{Cp}_2\text{Fe}/\text{Cp}_2\text{Fe}^+$  at  $E_{1/2} = 0$  V). (0.1M  $[\text{NBu}_4][\text{PF}_6]$  as supporting electrolyte).

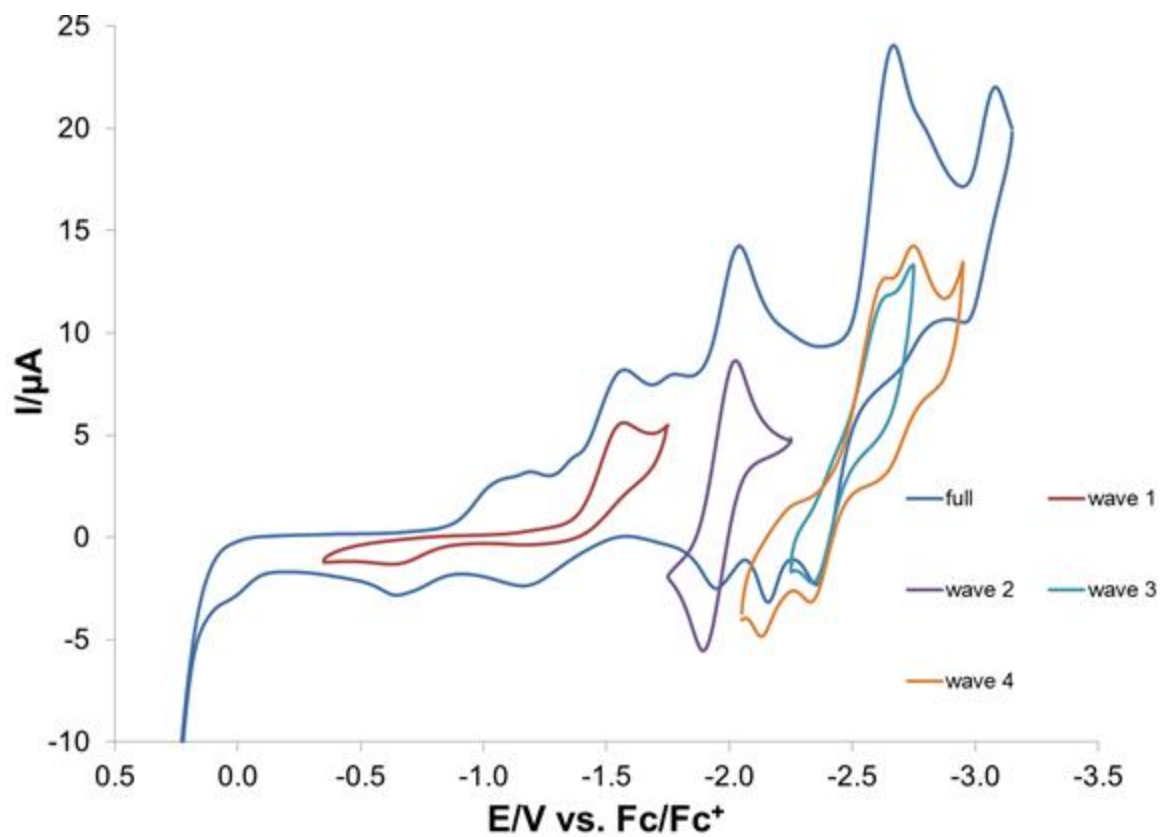

**Figure S53.** Room temperature cyclic voltammogram of  $4^{\text{mes}}$ -DMAP in THF (vs internally referenced  $\text{Cp}_2\text{Fe}/\text{Cp}_2\text{Fe}^+$  at  $E_{1/2} = 0$  V). (0.1M  $[\text{NBu}_4][\text{PF}_6]$  as supporting electrolyte). The scan rate is 125 mV/s.

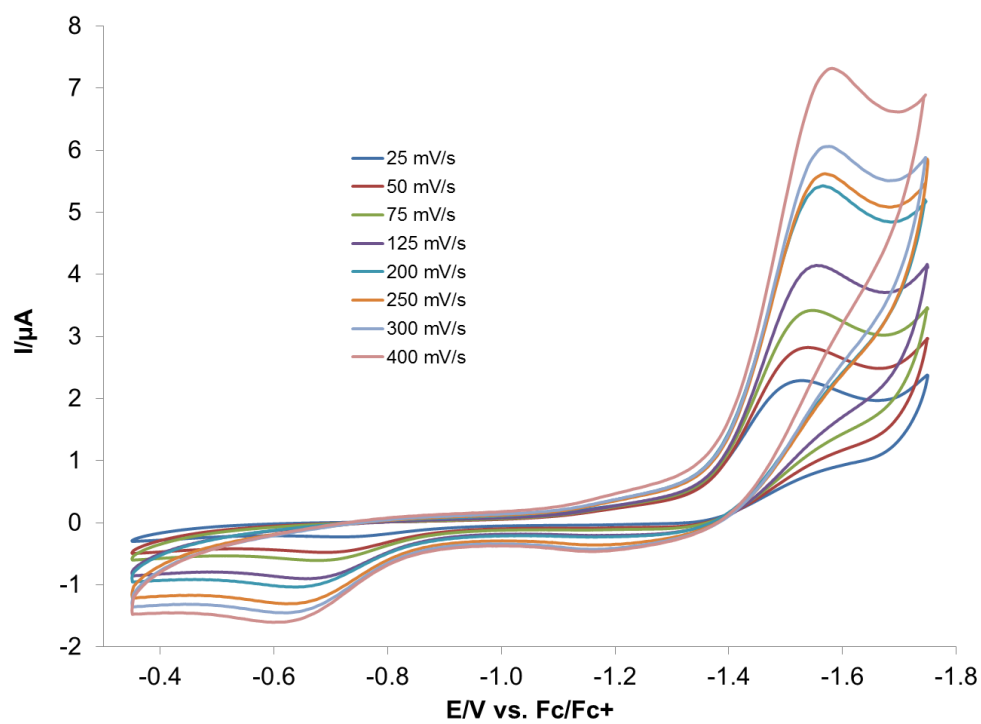

**Figure S54.** Room temperature cyclic voltammogram of wave 1 of 4<sup>mes</sup>-DMAP in THF (vs internally referenced Cp<sub>2</sub>Fe/Cp<sub>2</sub>Fe<sup>+</sup> at E<sub>1/2</sub> = 0 V). (0.1M [NBu<sub>4</sub>][PF<sub>6</sub>] as supporting electrolyte).

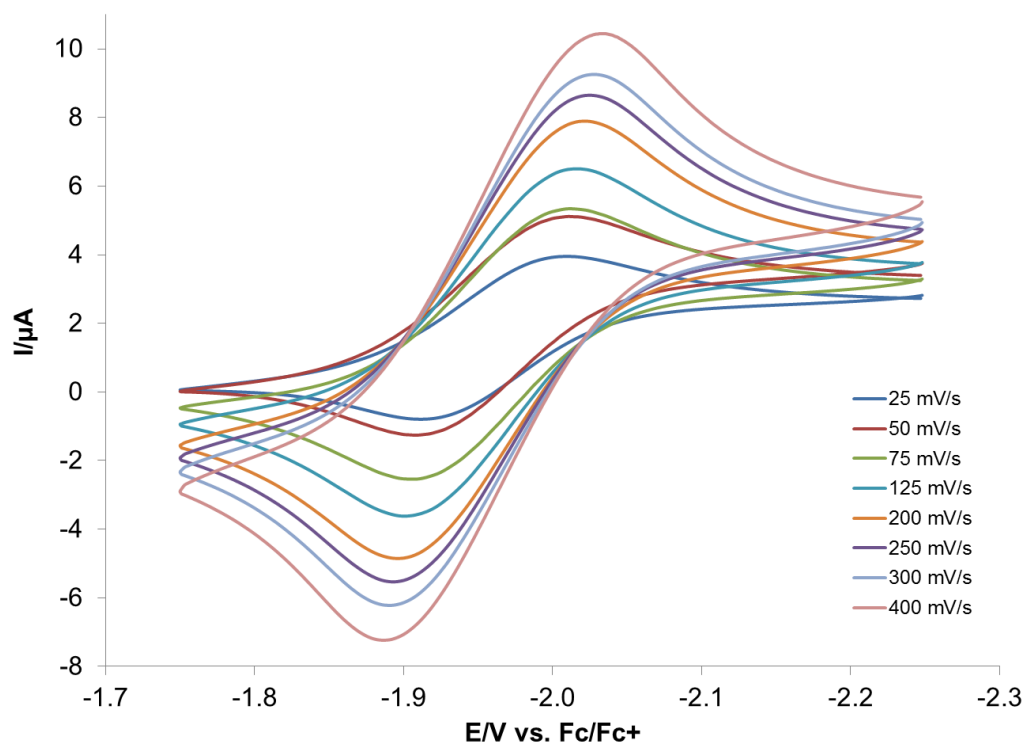

**Figure S55.** Room temperature cyclic voltammogram of wave 2 of **4<sup>mes</sup>-DMAP** in THF (vs internally referenced Cp<sub>2</sub>Fe/Cp<sub>2</sub>Fe<sup>+</sup> at E<sub>1/2</sub> = 0 V). (0.1M [NBu<sub>4</sub>][PF<sub>6</sub>] as supporting electrolyte).

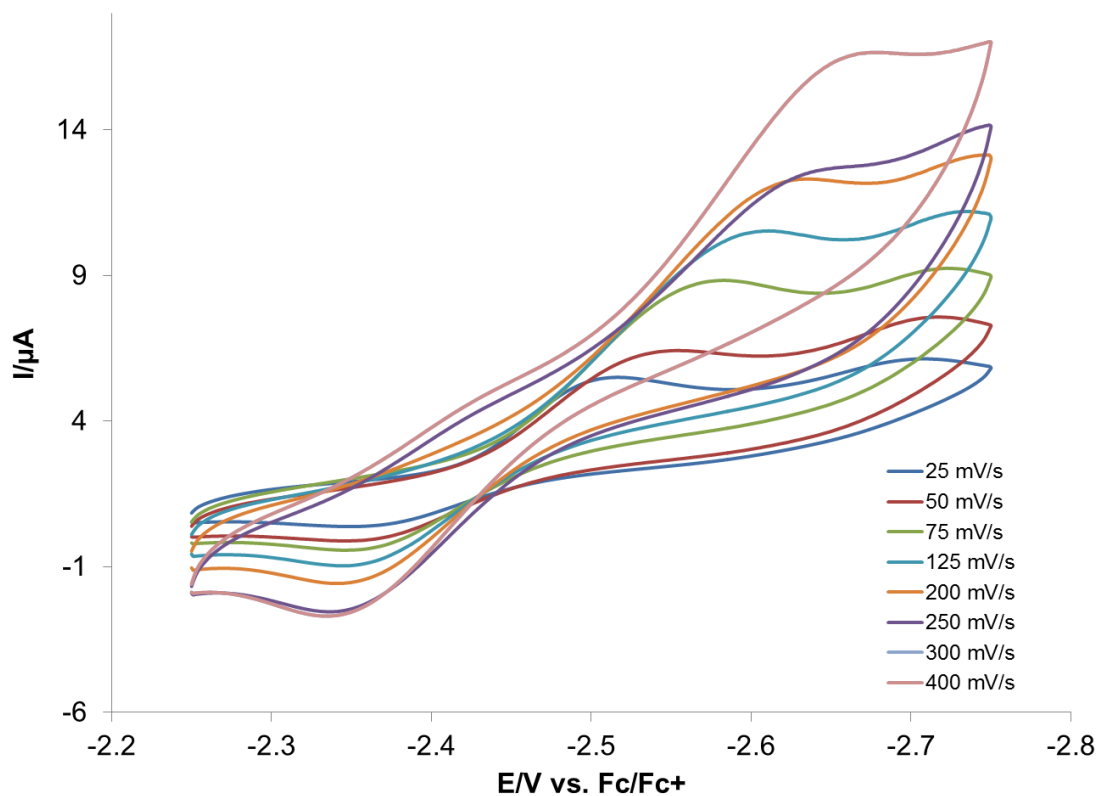

**Figure S56.** Room temperature cyclic voltammogram of wave 3 of  $4^{\text{mes}}$ -DMAP in THF (vs internally referenced  $\text{Cp}_2\text{Fe}/\text{Cp}_2\text{Fe}^+$  at  $E_{1/2} = 0$  V). (0.1M  $[\text{NBu}_4][\text{PF}_6]$  as supporting electrolyte).

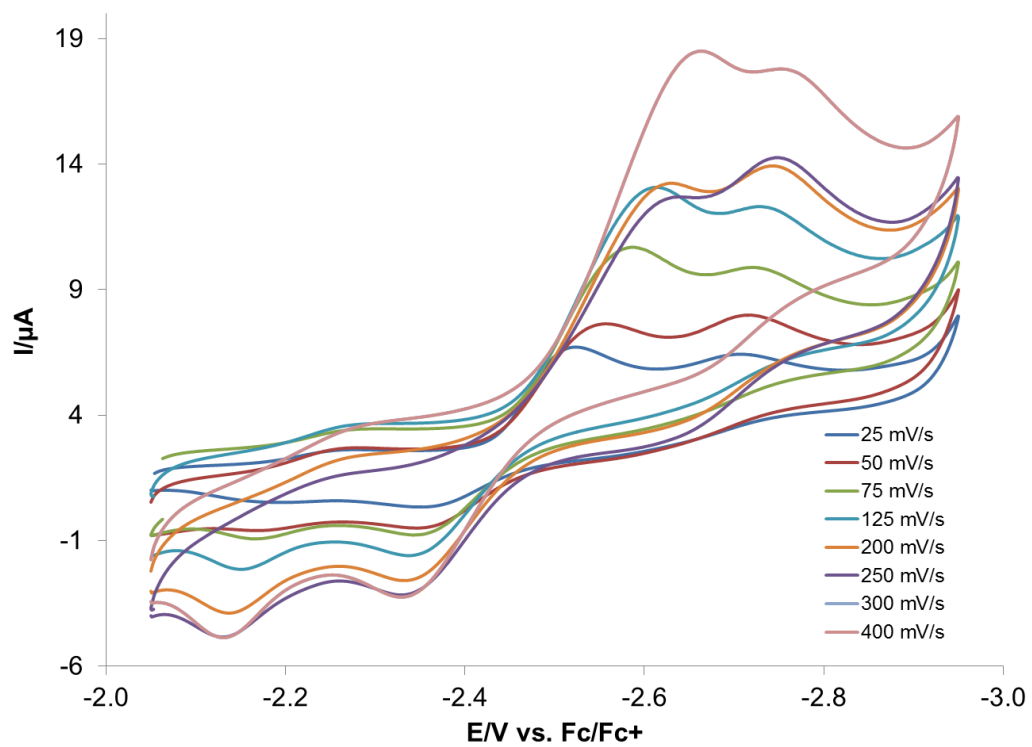

**Figure S57.** Room temperature cyclic voltammogram of wave 4 of **4<sup>mes</sup>-DMAP** in THF (vs internally referenced Cp<sub>2</sub>Fe/Cp<sub>2</sub>Fe<sup>+</sup> at E<sub>1/2</sub> = 0 V). (0.1M [NBu<sub>4</sub>][PF<sub>6</sub>] as supporting electrolyte).

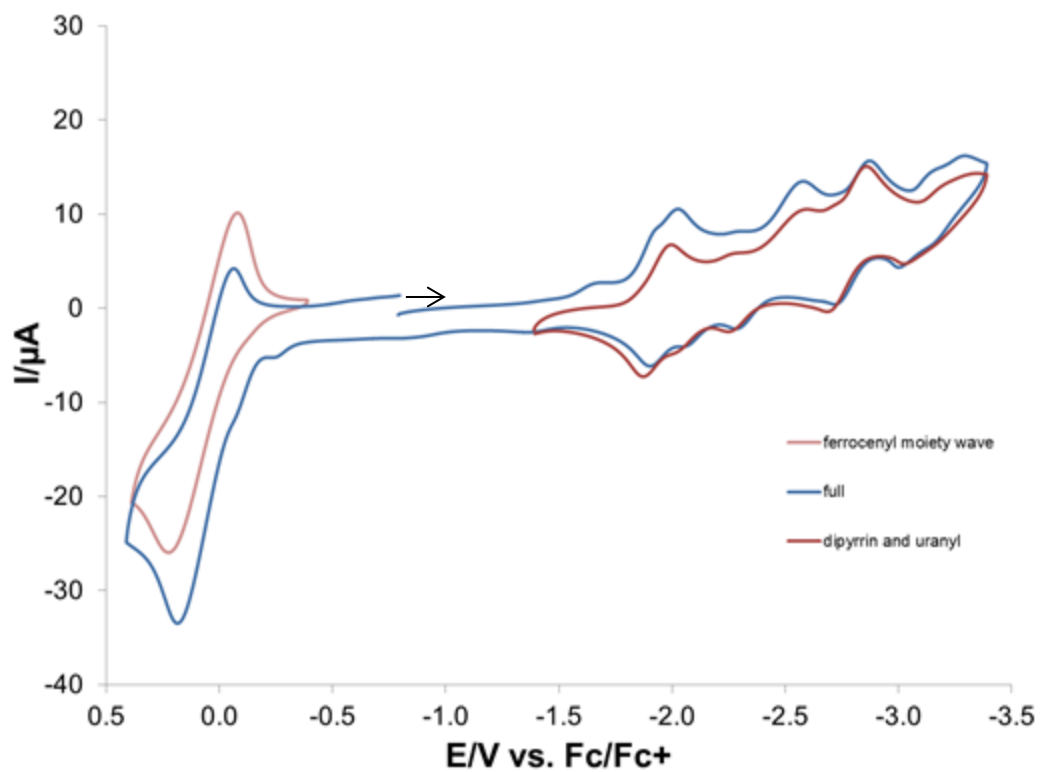

**Figure S58.** Room temperature cyclic voltammogram of  $4^{\text{Fc}}$ -DMAP in THF at 125 mV (vs internally referenced  $\text{Cp}_2\text{Fe}/\text{Cp}_2\text{Fe}^+$  at  $E_{1/2}=0$  V). (0.1M  $[\text{NBu}_4][\text{PF}_6]$  as supporting electrolyte).

The scan rate is 125 mV/s.



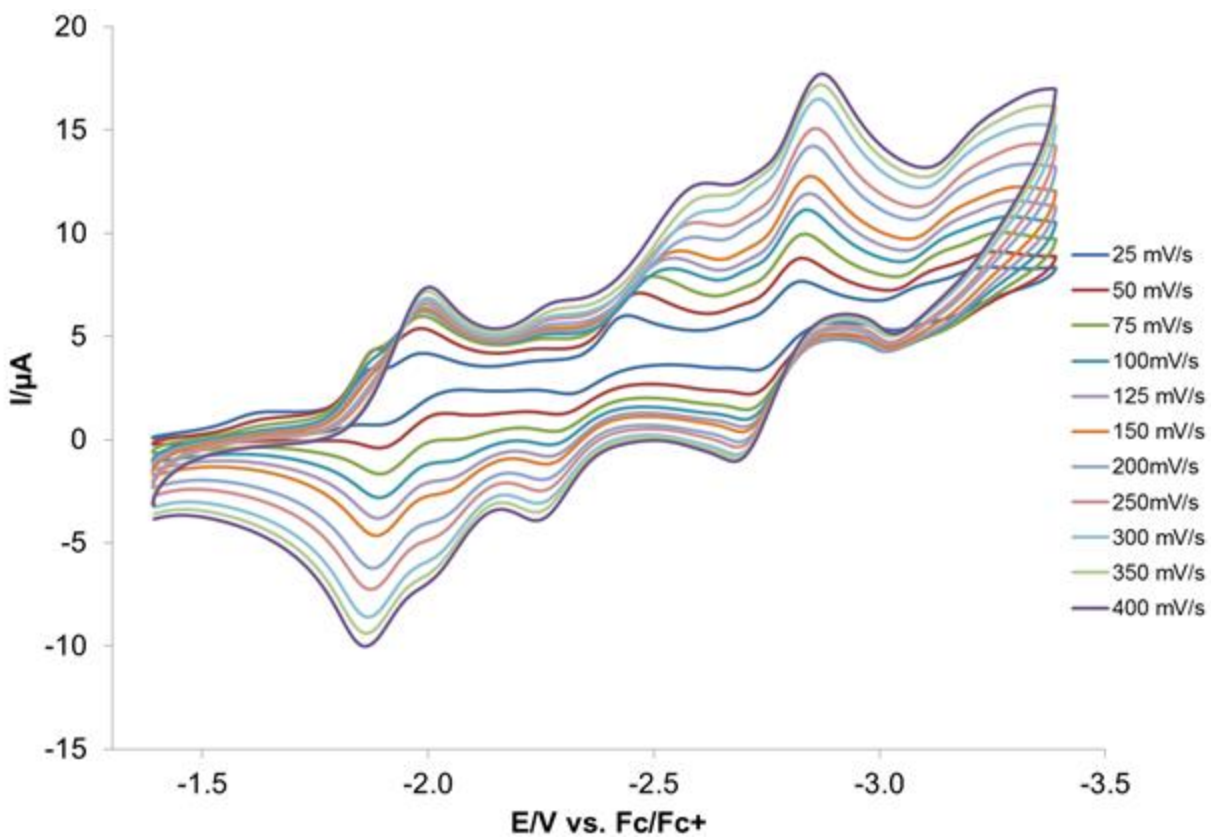

**Figure S59.** Room temperature cyclic voltammogram of 4<sup>Fc</sup>-DMAP in THF (vs internally referenced Cp<sub>2</sub>Fe/Cp<sub>2</sub>Fe<sup>+</sup> at E<sub>1/2</sub>=0 V). (0.1M [NBu<sub>4</sub>][PF<sub>6</sub>] as supporting electrolyte).

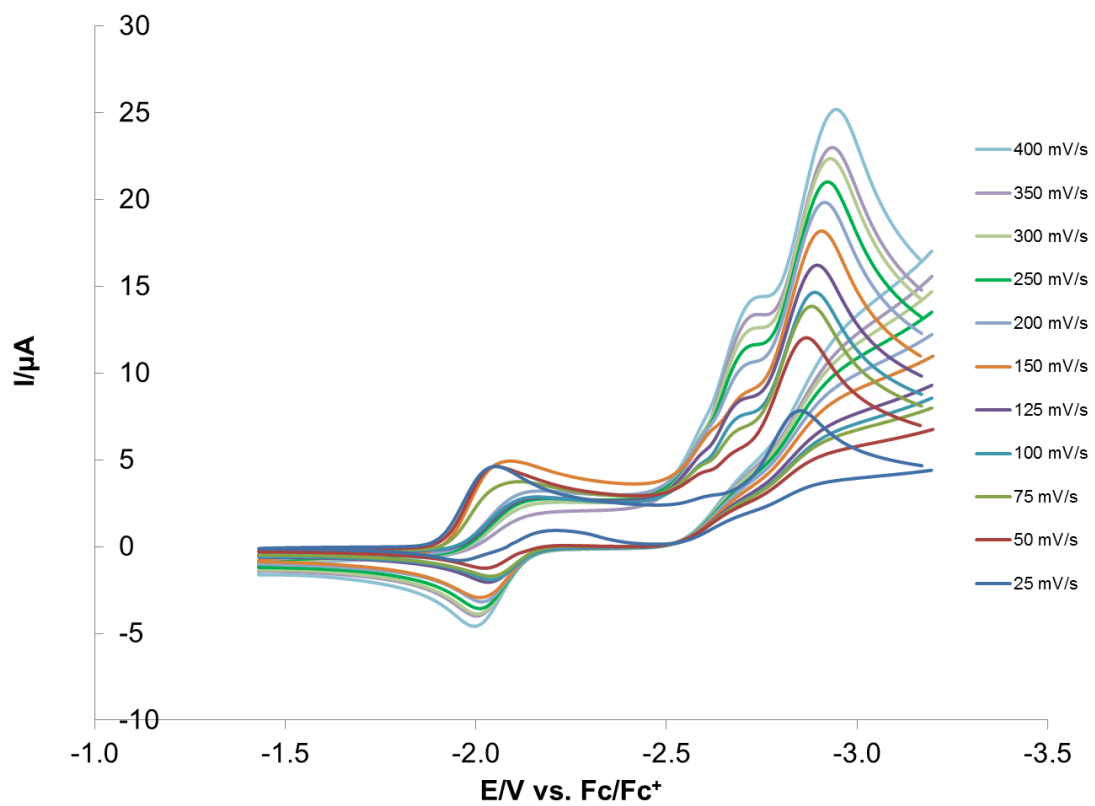

**Figure S60.** Room temperature cyclic voltammogram of  $2^{\text{anis}}$  in THF (vs internally referenced  $\text{Cp}_2\text{Fe}/\text{Cp}_2\text{Fe}^+$  at  $E_{1/2}=0$  V). (0.1M  $[\text{NBu}_4][\text{PF}_6]$  as supporting electrolyte).

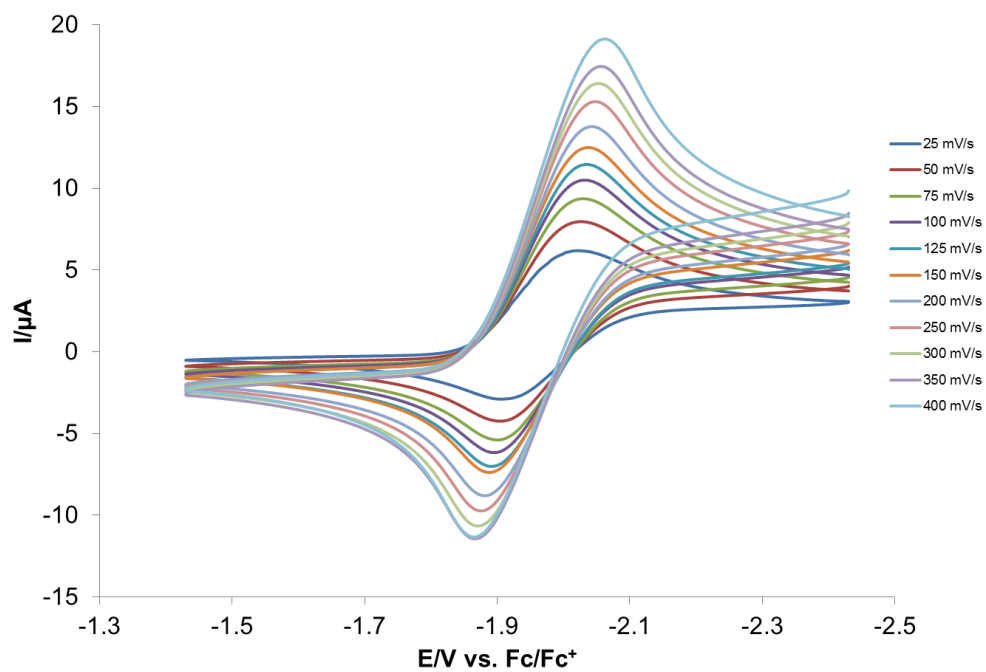

**Figure S61.** Room temperature cyclic voltammogram of wave 1 of  $2^{\text{anis}}$  in THF (vs internally referenced  $\text{Cp}_2\text{Fe}/\text{Cp}_2\text{Fe}^+$  at  $E_{1/2}=0$  V). (0.1M  $[\text{NBu}_4][\text{PF}_6]$  as supporting electrolyte).

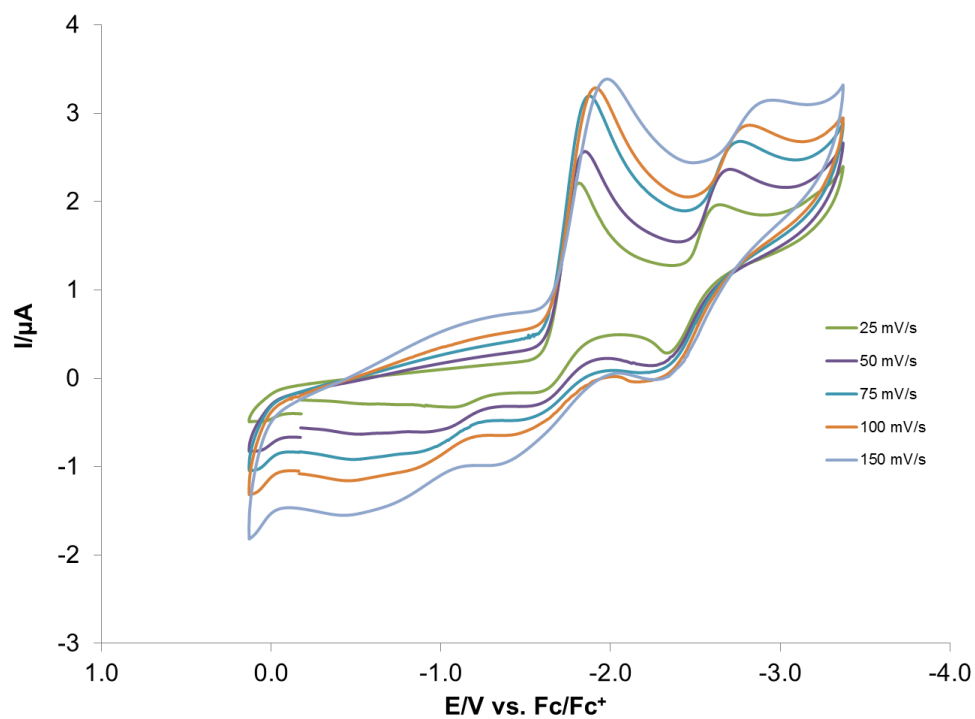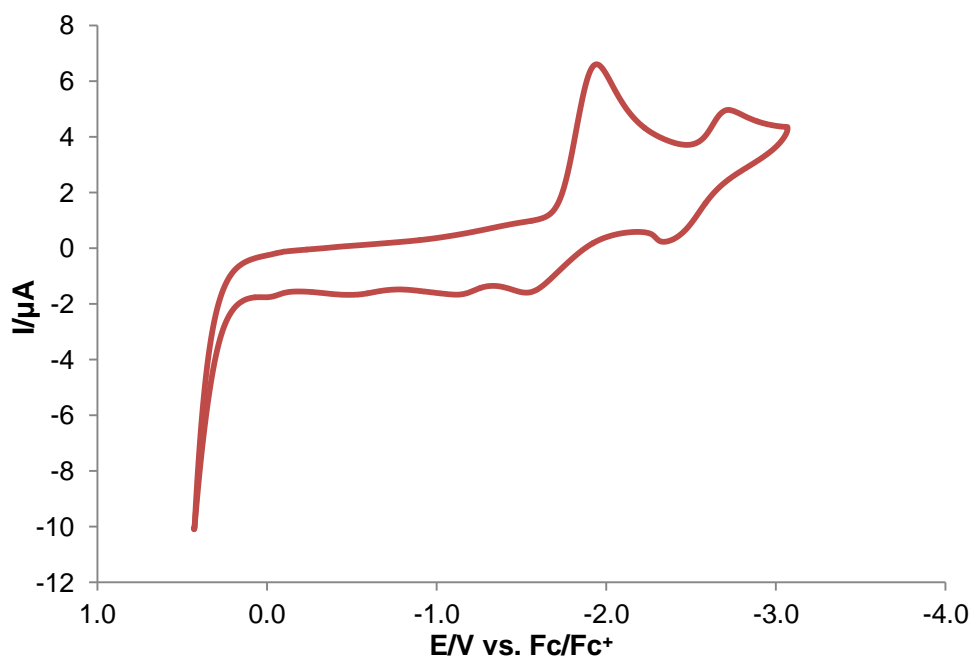

**Figure S62.** Room temperature cyclic voltammograms of  $\text{UO}_2(\text{N}(\text{Si}(\text{CH}_3)_3)_2)_2(\text{THF})_2$  in THF (vs internally referenced  $\text{Cp}_2\text{Fe}/\text{Cp}_2\text{Fe}^+$  at  $E_{1/2} = 0$  V). Bottom voltammogram at a scan rate of 250 mV/s.

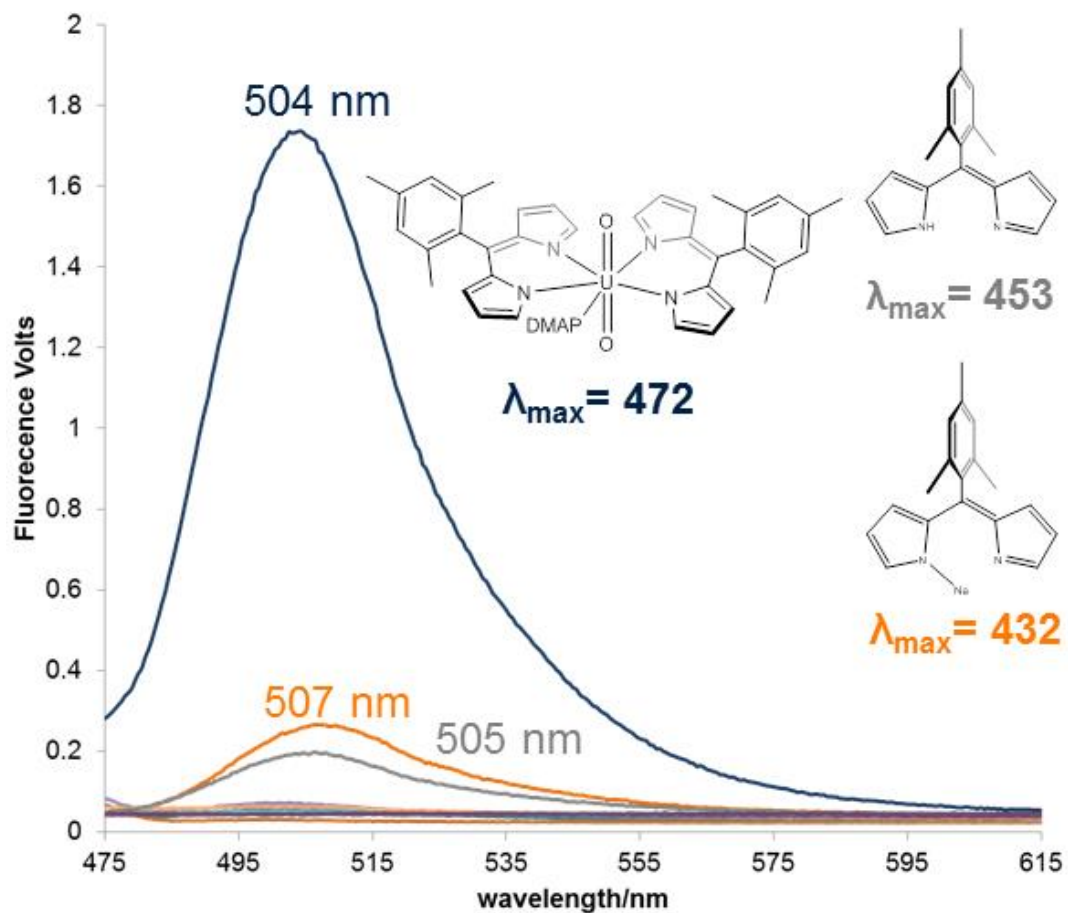

**Figure S63.** Fluorescence spectra of dipyrrens (**2**), sodium dipyrrens (**3**), and uranyl bis(dipyrrens) (**4**) in benzene (10  $\mu\text{M}$ ) with excitation wavelengths set to their respective absorption maxima determined in the same solvent and concentrations.

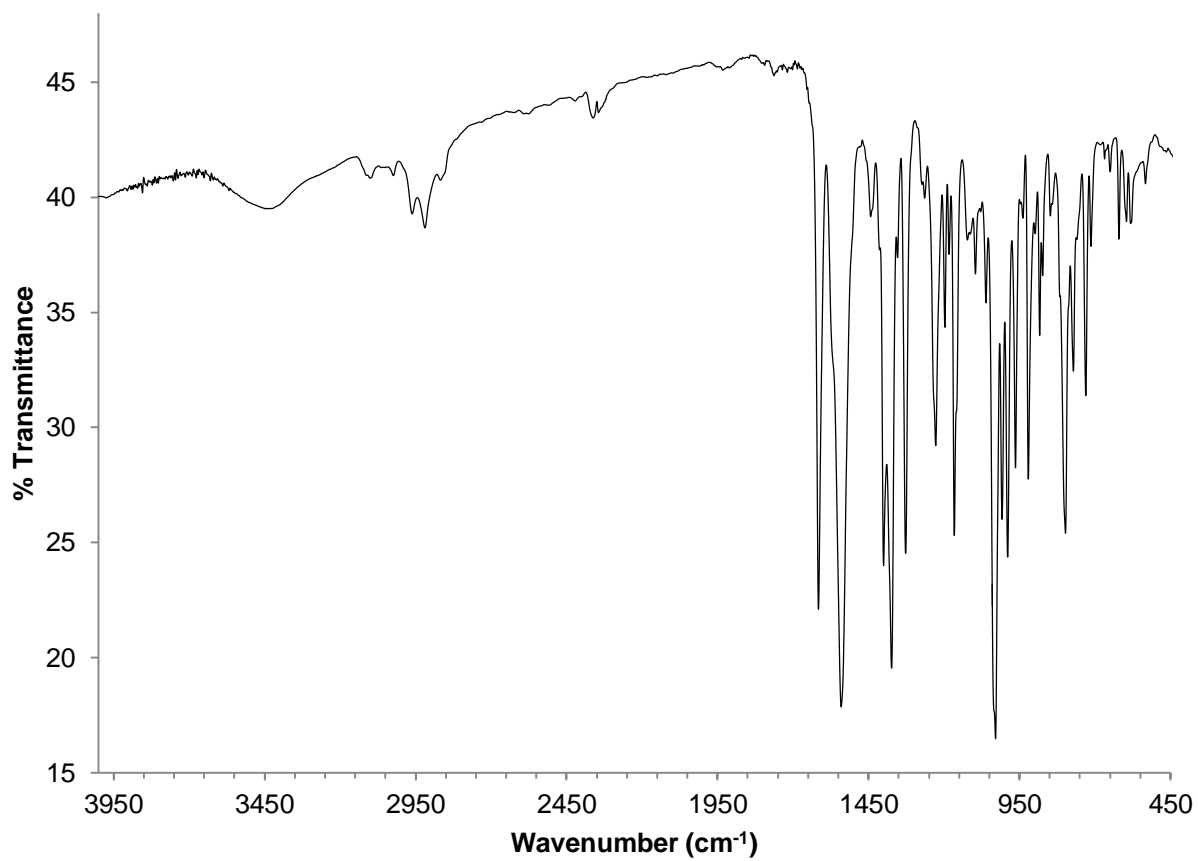

**Figure S64.** IR spectrum (KBr pellet) of **4<sup>tol</sup>-DMAP**.

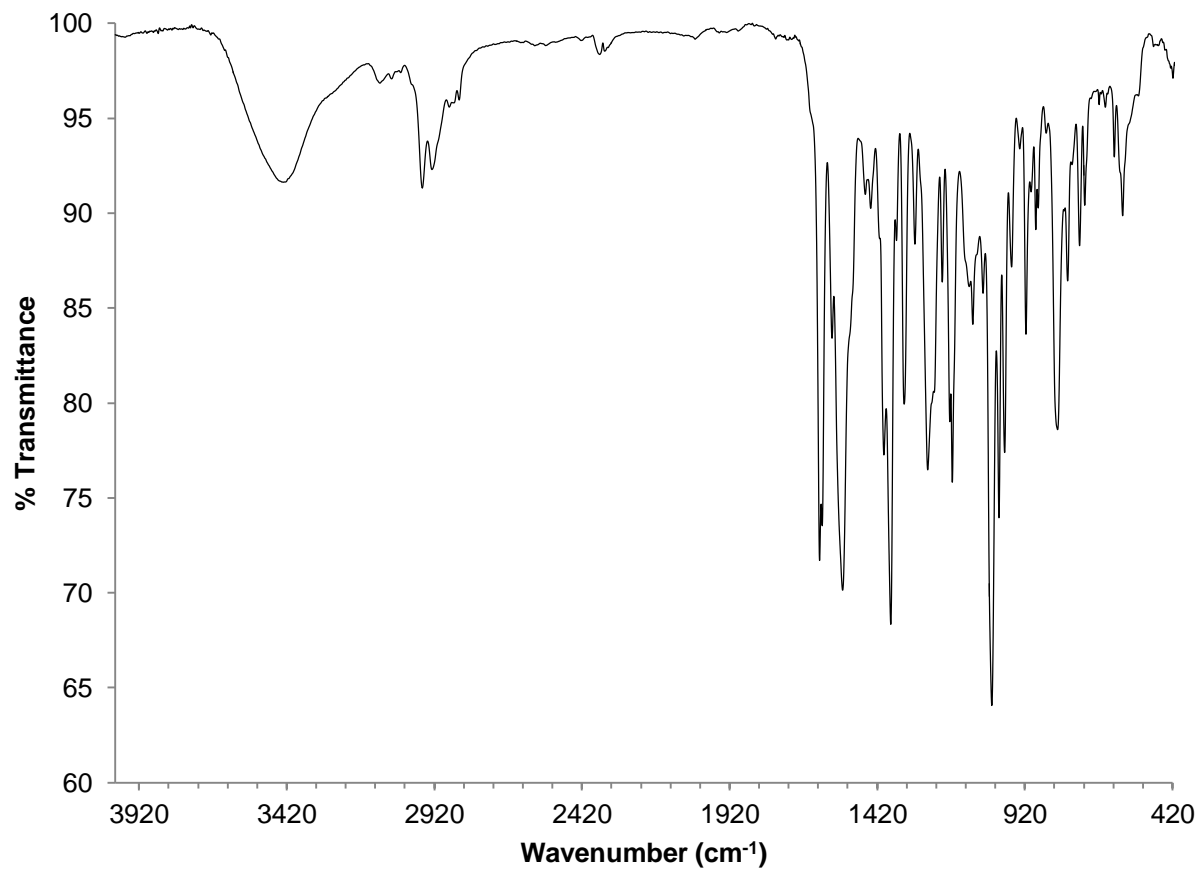

**Figure S65.** IR spectrum (KBr pellet) of 4<sup>anis</sup>-DMAP.

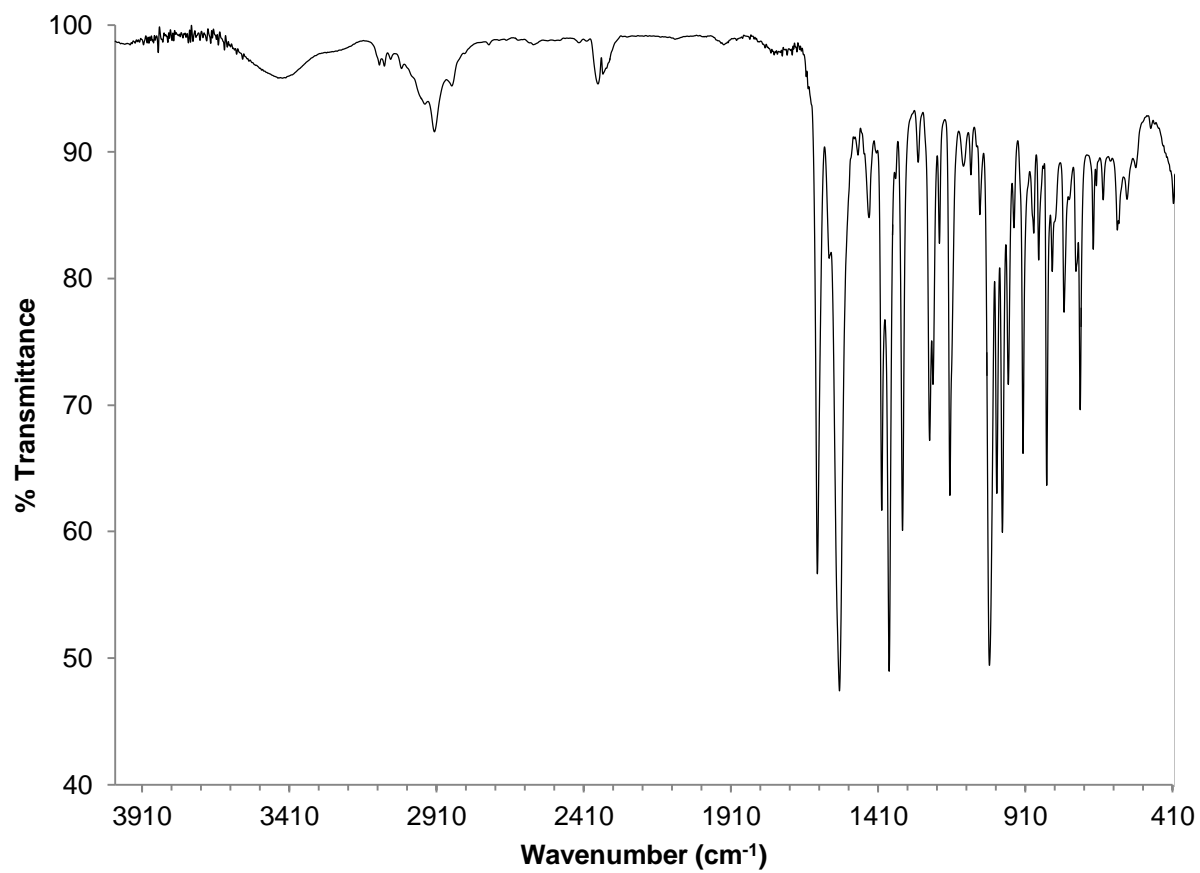

**Figure S66.** IR spectrum (KBr pellet) of 4<sup>mes</sup>-DMAP.



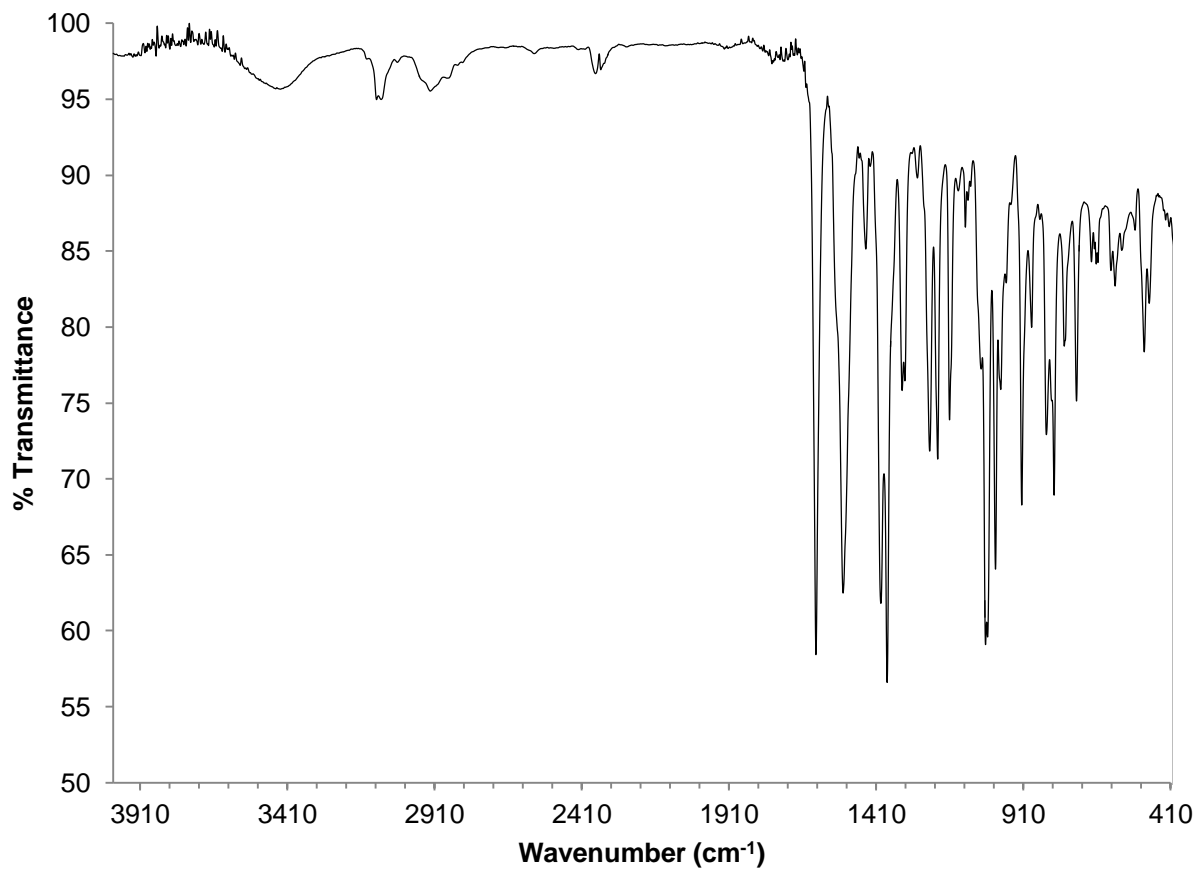

**Figure S67.** IR spectrum (KBr pellet) of **4<sup>Fc</sup>-DMAP**.

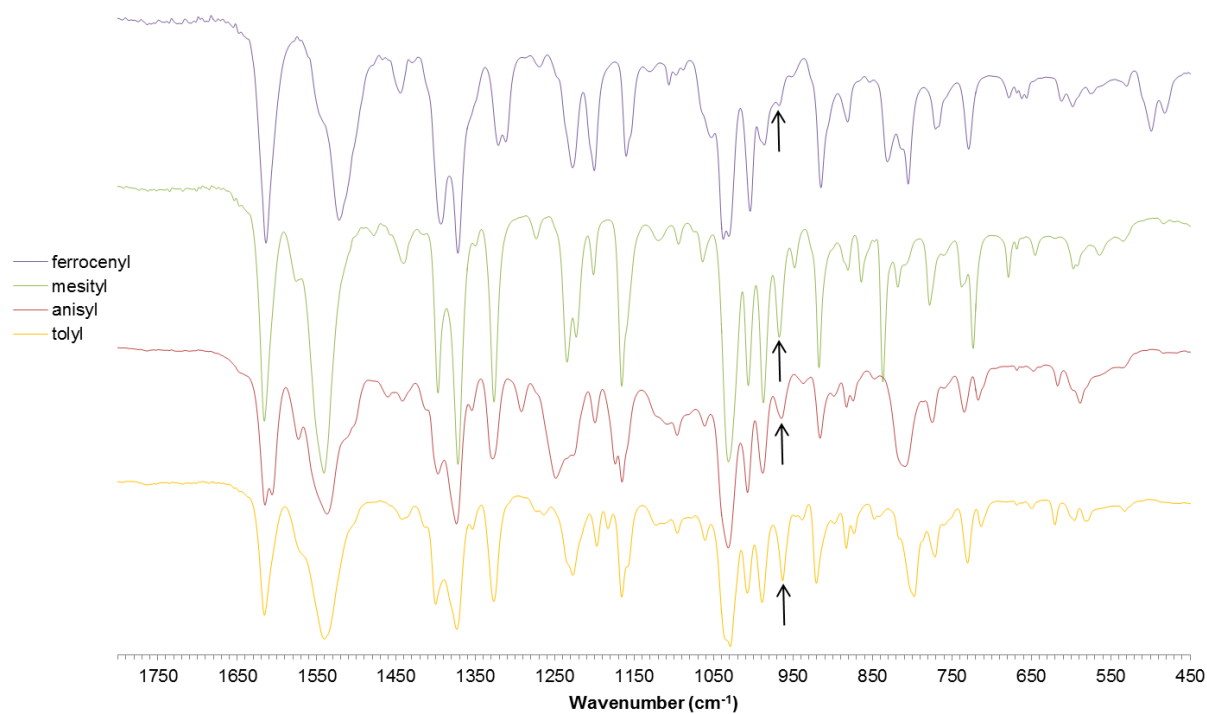

**Figure S68.** IR spectra (KBr pellet) of uranyl bis(dipyrrin) complexes. The arrows indicate the asymmetric  $\nu_3$  U-O stretch of uranyl at  $963\text{ cm}^{-1}$ .
